# Supplementary material for: OATargets: a knowledge base of genes associated with osteoarthritis joint damage in animals
Source: Ann Rheum Dis. 2020 Oct 19;80(3):376–83. doi: 10.1136/annrheumdis-2020-218344 (PMC7892386; doi:10.1136/annrheumdis-2020-218344)
Supplement: Supplementary data [file annrheumdis-2020-218344supp002.xlsx]

## Sheet: Legend
Supplementary Table 1: observations of genetic or exogenous interventions in animal models of OA
Full data:	Full curated data – kept up to date at http://skeletalvis.ncl.ac.uk/DOOM/
Promising:	Data filtered to keep genes with consistent effects in multiple studies with exogenous and genetic evidence
Column descriptions
PMID	The pubmed ID of the paper with describing the observation
Gene	The human gene symbol of the gene modulated in the study
Effect on gene product	The effect of the gene modulation on the gene product
Model	The type of OA model where the gene has been modulated
Susceptibility observed	Is there a increase (detrimental) or decrease (protective) in the OA severity observed upon gene modulation
Inferred gene effect	Given the observed effect of the gene modulation (protective or detrimental) and the effect on the gene product (increase or decrease in protein activity), is the gene likely to be protective or detrimental in OA?
Delivery	The tissue specificity of the gene modulation.
Species	The species under study
pub_date	The date of publication (epub)
LastAuthor	The last author of the publication
Type	Genetic or exogenous modulation?
Intervention	For the exogenous modulations what was the method of gene modulation?
simpleModel	The broad type of OA model where the gene has been modulated
effectConsensus	For all the observations where that gene has been modulated what is the consensus inferred gene effect? If there is any discrepancies in the inferred effect then ambiguous is given.
NumStudies	The number of publications studying each gene

## Sheet: All Data
PMID	Gene	Effect on gene product	Model	Susceptibility observed	Inferred gene effect	Delivery	Species	pub_date	LastAuthor	Type	Intervention	simpleModel	effectConsensus	NumStudies
24578232	A2M	exogenous	Surgical - ACLT	Protective	Protective	Articular cavity	Rat	2014-07-01	Wei L	Exogenous	Protein	Surgical	Protective	2
28743292	A2M	exogenous	Surgical - ACLT	Protective	Protective	Articular cavity	Rat	2017-07-25	Wei L	Exogenous	Protein	Surgical	Protective	2
31534049	ABAT	Overexpression	Surgical - MLI	Detrimental	Detrimental	Articular cavity	Mouse	2019-09-19	O'Keefe RJ	Exogenous	Viral	Surgical	Detrimental	3
31534049	ABAT	Knockdown	Surgical - MLI	Protective	Detrimental	Articular cavity	Mouse	2019-09-19	O'Keefe RJ	Exogenous	siRNA	Surgical	Detrimental	3
31534049	ABAT	Inhibition	Surgical - MLI	Protective	Detrimental	systemic	Mouse	2019-09-19	O'Keefe RJ	Exogenous	Vigabatrin	Surgical	Detrimental	3
30813547	ACAN	Misexpression	Spontaneous	Detrimental	Protective	Cartilage	Mouse	2019-02-26	Aszodi A	Genetic		Ageing	Protective	2
17510707	ACAN	Protect	Surgical - DMM	Protective	Protective	Global	Mouse	2007-05-17	Fosang AJ	Genetic		Surgical	Protective	2
15818704	ADAM15	Removal	Spontaneous	Detrimental	Protective	Global	Mouse	2005-04-01	Burkhardt H	Genetic		Ageing	Protective	1
29618652	ADAMTS12	Removal	Spontaneous	No effect	No effect	Global	Mouse	2018-04-05	Apte SS	Genetic		Ageing	No effect	1
15334469	ADAMTS4	Removal	Surgical - DMM	No effect	No effect	Global	Mouse	2004-08-01	Morris EA	Genetic		Surgical	No effect	1
21337391	ADAMTS5	Removal	Surgical - DMM	Protective	Detrimental	Global	Mouse	2010-10-26	Plaas A	Genetic		Surgical	Detrimental	8
21337391	ADAMTS5	Removal	TGFB and Treadmill	Protective	Detrimental	Global	Mouse	2010-10-26	Plaas A	Genetic		Exercise	Detrimental	8
19010693	ADAMTS5	Removal	Surgical - DMM	Protective	Detrimental	Global	Mouse	2008-10-17	van Osch GJ	Genetic		Surgical	Detrimental	8
17968948	ADAMTS5	Removal	Surgical - DMM	Protective	Detrimental	Global	Mouse	2007-11-01	Glasson SS	Genetic		Surgical	Detrimental	8
15800624	ADAMTS5	Removal	Surgical - DMM	Protective	Detrimental	Global	Mouse	2005-03-31	Morris EA	Genetic		Surgical	Detrimental	8
23954517	ADAMTS5	Inhibition	STR/ort	Protective	Detrimental	Articular cavity	Mouse	2013-08-15	Visintin M	Exogenous	Antibody	Surgical	Detrimental	8
26410555	ADAMTS5	Inhibition	Surgical - DMM	Protective	Detrimental	systemic	Mouse	2015-09-26	Malfait AM	Exogenous	Antibody	Surgical	Detrimental	8
28120109	ADAMTS5	Knockdown	Surgical - DMM	Protective	Detrimental	Articular cavity	Mouse	2017-01-24	Sasho T	Exogenous	siRNA	Surgical	Detrimental	8
23928557	ADAMTS7	Overexpression	Spontaneous	Detrimental	Detrimental	Cartilage	Mouse	2013-08-08	Liu CJ	Genetic		Ageing	Ambiguous	4
23928557	ADAMTS7	Overexpression	Surgical - DMM	Detrimental	Detrimental	Cartilage	Mouse	2013-08-08	Liu CJ	Genetic		Surgical	Ambiguous	4
23928557	ADAMTS7	Removal	Surgical - DMM	Protective	Detrimental	Global	Mouse	2013-08-08	Liu CJ	Genetic		Surgical	Ambiguous	4
29618652	ADAMTS7	Removal	Spontaneous	No effect	No effect	Global	Mouse	2018-04-05	Apte SS	Genetic		Ageing	Ambiguous	4
28492224	ADORA2A	Removal	Spontaneous	Detrimental	Protective	Global	Mouse	2017-05-11	Cronstein BN	Genetic		Ageing	Protective	1
30088034	ADORA3	Removal	Spontaneous	Detrimental	Protective	Global	Mouse	2018-08-07	Evseenko D	Genetic		Ageing	Protective	1
31926929	ADRB2	Removal	Surgical - TMJ	Protective	Detrimental	MSC	Mouse	2020-01-09	Jiao K	Genetic		Surgical	Detrimental	1
29667227	AGER	Removal	Impact	No effect	No effect	Global	Mouse	2018-05-24	Martin JA	Genetic		Surgical	Ambiguous	4
27236646	AGER	Removal	Surgical - TMJ	Protective	Detrimental	Global	Mouse	2016-05-14	Kooyman DL	Genetic		Surgical	Ambiguous	4
23755017	AGER	Removal	Surgical - DMM	Protective	Detrimental	Global	Mouse	2013-05-28	Kooyman DL	Genetic		Surgical	Ambiguous	4
19342682	AGER	Removal	Surgical - ACLT	No effect	No effect	Global	Mouse	2009-04-15	Terkeltaub R	Genetic		Surgical	Ambiguous	4
30610922	AGTR1	Inhibition	Col11a1 haploinsufficient	Protective	Detrimental	systemic	Mouse	2019-01-03	Seegmiller RE	Exogenous	losartan	Genetic	Detrimental	1
31209645	AHSG	Overexpression	Surgical - ACLT	No effect	No effect	Articular cavity	Rat	2019-06-17	Nikolaou VS	Exogenous	Exogenous	Surgical	No effect	1
20187155	AKT1	Removal	Surgical - DMM + MM	Protective	Detrimental	Global	Mouse	2010-03-01	Kawaguchi H	Genetic		Surgical	Detrimental	1
28694081	ALOX15	Removal	Spontaneous	Detrimental	Protective	Global	Mouse	2017-07-08	Fahmi H	Genetic		Ageing	Protective	2
28694081	ALOX15	Removal	Surgical - DMM	Detrimental	Protective	Global	Mouse	2017-07-08	Fahmi H	Genetic		Surgical	Protective	2
30209244	ANP32A	Removal	Surgical - DMM	Protective	Detrimental	Global	Mouse	2018-09-12	Lories RJ	Genetic		Surgical	Detrimental	4
30209244	ANP32A	Removal	Collagenase	Protective	Detrimental	Global	Mouse	2018-09-12	Lories RJ	Genetic		Protease	Detrimental	4
30209244	ANP32A	Removal	papain	Protective	Detrimental	Global	Mouse	2018-09-12	Lories RJ	Genetic		Protease	Detrimental	4
30209244	ANP32A	Removal	Spontaneous	Protective	Detrimental	Global	Mouse	2018-09-12	Lories RJ	Genetic		Ageing	Detrimental	4
24022118	ANXA6	Removal	Surgical - DMM + MM	Protective	Detrimental	Global	Mouse	2013-12-01	Kirsch T	Genetic		Surgical	Detrimental	1
23151457	APOA1	Removal	High Fat Diet	Detrimental	Protective	Global	Mouse	2012-11-11	Papachristou DJ	Genetic		High Fat Diet	Protective	1
29074298	APOE	Removal	High Fat Diet	Detrimental	Protective	Global	Mouse	2017-10-24	Stoop R	Genetic		High Fat Diet	Protective	2
26687826	APOE	Removal	Collagenase	Detrimental	Protective	Global	Mouse	2015-12-12	van Lent PL	Genetic		Protease	Protective	2
30610061	ARG2	Removal	Surgical - DMM	Protective	Detrimental	Global	Mouse	2019-01-04	Chun JS	Genetic		Surgical	Detrimental	1
31961823	ARPC2	Removal	Spontaneous	Detrimental	Protective	Cartilage	Mouse	2020-02-27	Risbud MV	Genetic		Ageing	Protective	1
22909215	ASIC3	Inhibition	MIA	Protective	Detrimental	Articular cavity	Rat	2012-08-21	Tani T	Exogenous	APETx2	MIA	Detrimental	1
27159257	ATF3	Removal	Surgical - DMM + MCL	Protective	Detrimental	Cartilage	Mouse	2016-06-14	Hinoi E	Genetic		Surgical	Detrimental	1
31511053	ATF6	Removal	Surgical - DMM	No effect	No effect	Global	Mouse	2019-09-11	Boot-Handford RP	Genetic		Surgical	No effect	1
26438374	ATG5	Removal	Spontaneous	Detrimental	Protective	Cartilage	Mouse	2015-10-05	Chagin AS	Genetic		Ageing	Protective	1
24386478	ATRX	Removal	Spontaneous	No effect	No effect	Forelimb	Mouse	2013-12-30	Beier F	Genetic		Ageing	No effect	1
31357086	AURKA	Knockdown	Surgical - DMM	Protective	Detrimental	Articular cavity	Mouse	2019-07-26	Li X	Exogenous	siRNA	Surgical	Detrimental	1
30070692	AXIN1	Removal	Spontaneous	Detrimental	Protective	Cartilage Inducible	Mouse	2018-08-02	Chen D	Genetic		Ageing	Protective	1
29415892	AXIN2	Inhibition	Surgical - DMM	Protective	Detrimental	Articular cavity	Mouse	2018-02-08	Young PP	Exogenous	XAV-939	Surgical	Detrimental	1
30471358	B4GALNT1	Removal	Spontaneous	Detrimental	Protective	Global	Mouse	2018-11-22	Iwasaki N	Genetic		Ageing	Protective	1
26458773	BACH1	Removal	Spontaneous	Protective	Detrimental	Global	Mouse	2015-10-13	Ochi M	Genetic		Ageing	Detrimental	2
26458773	BACH1	Removal	Surgical - DMM + MCL	Protective	Detrimental	Global	Mouse	2015-10-13	Ochi M	Genetic		Surgical	Detrimental	2
27147707	BATF	Removal	Surgical - DMM	Protective	Detrimental	Global	Mouse	2016-05-04	Chun JS	Genetic		Surgical	Detrimental	3
27147707	BATF	Overexpression	Surgical - DMM	Detrimental	Detrimental	Cartilage	Mouse	2016-05-04	Chun JS	Genetic		Surgical	Detrimental	3
27147707	BATF	Overexpression	Surgical - DMM	Detrimental	Detrimental	Articular cavity	Mouse	2016-05-04	Chun JS	Exogenous	Viral	Surgical	Detrimental	3
29971011	BBS1	Removal	Spontaneous	Detrimental	Protective	Global	Mouse	2018-06-19	Kooyman DL	Genetic		Ageing	Protective	1
32611834	BCL2	Inhibition	Surgical - DMM + Mesical tear	Protective	Detrimental	Articular cavity	Rat	2020-07-01	Yang L	Exogenous	ABT263	Surgical	Detrimental	1
32683043	BECN1	Activation	Surgical - DMM	Detrimental	Detrimental	Articular cavity	Mouse	2020-07-17	Kapoor M	Exogenous	TAT-Beclin-1	Surgical	Detrimental	1
19932218	BGN	Removal	Spontaneous	Detrimental	Protective	Global	Mouse	2009-11-18	Höök M	Genetic		Ageing	Protective	3
16006154	BGN	Removal	Spontaneous	Detrimental	Protective	Global	Mouse	2005-09-01	Ameye LG	Genetic		Ageing	Protective	3
11978731	BGN	Removal	Spontaneous	Detrimental	Protective	Global	Mouse	2002-05-01	Young MF	Genetic		Ageing	Protective	3
24448347	BMP2	Overexpression	Surgical - DMM	Detrimental	Detrimental	Cartilage Inducible	Mouse	2014-01-21	van der Kraan PM	Genetic		Surgical	Ambiguous	2
17590359	BMP2	exogenous	Collagenase	Protective	Protective	Articular cavity	Rat	2007-06-22	Han B	Exogenous	Protein	Protease	Ambiguous	2
25889639	BMP7	Removal	Spontaneous	Detrimental	Protective	Forelimb	Mouse	2015-04-15	Tsuji K	Genetic		Ageing	Protective	5
17977753	BMP7	exogenous	Surgical - ACLT	Protective	Protective	Articular cavity	Rabbit	2007-10-31	Amiel D	Exogenous	Protein	Surgical	Protective	5
18941854	BMP7	exogenous	Surgical - ACLT	Protective	Protective	Articular cavity	Rabbit	2008-10-22	Amiel D	Exogenous	Protein	Surgical	Protective	5
19170094	BMP7	exogenous	Exercise	Protective	Protective	Articular cavity	Rat	2009-08-01	Muneta T	Exogenous	Protein	Exercise	Protective	5
20872588	BMP7	exogenous	Surgical - ACLT	Protective	Protective	Articular cavity	Rabbit	2010-11-01	Sekiya I	Exogenous	Protein	Surgical	Protective	5
15492776	BMPR1A	Removal	Spontaneous	Detrimental	Protective	Developing Joints	Mouse	2004-10-19	Kingsley DM	Genetic		Ageing	Protective	2
28420447	BMPR1A	Activation	Surgical - DMM	Protective	Protective	Articular cavity	Mouse	2017-04-18	Nohe A	Exogenous	CK2.1	Surgical	Protective	2
28844955	BRD2	Inhibition	Surgical - ACLT	Protective	Detrimental	Articular cavity	Mouse	2017-08-24	Ma J	Exogenous	JQ1	Surgical	Detrimental	2
29784003	BRD2	Inhibition	Surgical - DMM	Protective	Detrimental	systemic	Mouse	2018-05-21	Jiang Q	Exogenous	I-BET151	Surgical	Detrimental	2
28844955	BRD3	Inhibition	Surgical - ACLT	Protective	Detrimental	Articular cavity	Mouse	2017-08-24	Ma J	Exogenous	JQ1	Surgical	Detrimental	2
29784003	BRD3	Inhibition	Surgical - DMM	Protective	Detrimental	Articular cavity	Mouse	2018-05-21	Jiang Q	Exogenous	I-BET151	Surgical	Detrimental	2
28844955	BRD4	Inhibition	Surgical - ACLT	Protective	Detrimental	Articular cavity	Mouse	2017-08-24	Ma J	Exogenous	JQ1	Surgical	Detrimental	2
29784003	BRD4	Inhibition	Surgical - DMM	Protective	Detrimental	Articular cavity	Mouse	2018-05-21	Jiang Q	Exogenous	I-BET151	Surgical	Detrimental	2
22057346	C3	Inhibition	Surgical - MM	Protective	Detrimental	systemic	Mouse	2011-11-06	Robinson WH	Exogenous	CR2-fH	Surgical	Detrimental	1
22057346	C5	Removal	Surgical - MM	Protective	Detrimental	Global	Mouse	2011-11-06	Robinson WH	Genetic		Surgical	Detrimental	3
22057346	C5	Inhibition	Surgical - MM	Protective	Detrimental	systemic	Mouse	2011-11-06	Robinson WH	Exogenous	Antibody	Surgical	Detrimental	3
22057346	C5	Inhibition	Surgical - MM	Protective	Detrimental	systemic	Mouse	2011-11-06	Robinson WH	Exogenous	CR2-fH	Surgical	Detrimental	3
22057346	C6	Removal	Surgical - MM	Protective	Detrimental	Global	Mouse	2011-11-06	Robinson WH	Genetic		Surgical	Detrimental	1
26011709	CACNA1G	Removal	Spontaneous	Protective	Detrimental	Global	Mouse	2015-05-26	Kirn-Safran CB	Genetic		Ageing	Detrimental	1
22122987	CALCA	Overexpression	Surgical - DMM	Protective	Protective	Global	Mouse	2011-11-13	Karsdal MA	Genetic		Surgical	Ambiguous	4
31926346	CALCA	Removal	Surgical - DMM	Detrimental	Protective	Global	Mouse	2020-01-08	Grässel S	Genetic		Surgical	Ambiguous	4
26686833	CALCA	Inhibition	Surgical - DMM	Protective	Detrimental	systemic	Mouse	2016-01-12	Ochi M	Exogenous	BIBN4096	Surgical	Ambiguous	4
27345362	CALCA	exogenous	Surgical - ACLT	Protective	Protective	systemic	Rat	2016-06-27	Jean YH	Exogenous	Protein	Surgical	Ambiguous	4
14673996	CASP1	Removal	Surgical - DMM + MM	Detrimental	Protective	Global	Mouse	2003-12-01	Mason RM	Genetic		Surgical	Ambiguous	3
13129693	CASP1	Inhibition	Collagenase	Protective	Detrimental	systemic	Mouse	2003-10-01	van den Berg W	Exogenous	pralnacasan	Protease	Ambiguous	3
13129693	CASP1	Inhibition	STR/ort	Protective	Detrimental	systemic	Mouse	2003-10-01	van den Berg W	Exogenous	pralnacasan	Surgical	Ambiguous	3
30496623	CASR	Removal	Surgical - UAC	Protective	Detrimental	Cartilage Inducible	Mouse	2019-01-07	Wang M	Genetic		Surgical	Detrimental	2
30496623	CASR	Inhibition	Surgical - UAC	Protective	Detrimental	Articular cavity	Mouse	2019-01-07	Wang M	Exogenous	NPS2143	Surgical	Detrimental	2
30917318	CBX4	Overexpression	Surgical - ACLT	Protective	Protective	Articular cavity	Mouse	2019-03-26	Liu GH	Exogenous	Viral	Surgical	Protective	1
29622035	CCL17	Removal	Collagenase	Protective	Detrimental	Global	Mouse	2018-04-05	Cook AD	Genetic		Protease	Detrimental	3
29622035	CCL17	Inhibition	Collagenase	Protective	Detrimental	systemic	Mouse	2018-04-05	Cook AD	Exogenous	Antibody	Protease	Detrimental	3
32028021	CCL17	Inhibition	Collagenase	Protective	Detrimental	Articular cavity	Mouse	2020-02-03	Cook AD	Exogenous	Antibody	Protease	Detrimental	3
27965260	CCL2	Removal	Surgical - DMM	Protective	Detrimental	Global	Mouse	2016-12-13	Robinson WH	Genetic		Surgical	Ambiguous	7
31424112	CCL2	Removal	Surgical -ACLT	Protective	Detrimental	Global	Mouse	2019-08-30	Krawetz RJ	Genetic		Surgical	Ambiguous	7
31424112	CCL2	Removal	Spontaneous	No effect	No effect	Global	Mouse	2019-08-30	Krawetz RJ	Genetic		Ageing	Ambiguous	7
31424112	CCL2	Removal	Surgical - Cartilage Injury	No effect	No effect	Global	Mouse	2019-08-30	Krawetz RJ	Genetic		Surgical	Ambiguous	7
27746376	CCL2	Removal	Surgical - DMM	No effect	No effect	Global	Mouse	2016-10-13	Vincent TL	Genetic		Surgical	Ambiguous	7
27965260	CCL2	Inhibition	Surgical - DMM	Protective	Detrimental	systemic	Mouse	2016-12-13	Robinson WH	Exogenous	bindarit	Surgical	Ambiguous	7
32006659	CCL2	Inhibition	Collagenase	Protective	Detrimental	Articular cavity	Mouse	2020-01-29	Meng F	Exogenous	Antibody	Protease	Ambiguous	7
30977553	CCL25	exogenous	Spontaneous	Protective	Protective	Articular cavity	Guinea pig	2019-04-29	Sittinger M	Exogenous	Protein	Ageing	Protective	1
32006659	CCL3	Inhibition	Collagenase	Protective	Detrimental	Articular cavity	Mouse	2020-01-29	Meng F	Exogenous	Antibody	Protease	Detrimental	1
27965260	CCL5	Removal	Surgical - DMM	No effect	No effect	Global	Mouse	2016-12-13	Robinson WH	Genetic		Surgical	No effect	1
29925506	CCN2	Removal	Surgical - DMM	Protective	Detrimental	Inducible	Mouse	2018-06-20	Vincent TL	Genetic		Surgical	Ambiguous	6
23951098	CCN2	Overexpression	Spontaneous	Protective	Protective	Cartilage	Mouse	2013-08-12	Takigawa M	Genetic		Ageing	Ambiguous	6
32616521	CCN2	Removal	Surgical – DMM	No effect	No effect	Cartilage Inducible	Mouse	2020-07-02	Poulet B	Genetic		Surgical	Ambiguous	6
32616521	CCN2	Removal	Cyclic loading	No effect	No effect	Cartilage Inducible	Mouse	2020-07-02	Poulet B	Genetic		Surgical	Ambiguous	6
15231019	CCN2	exogenous	MIA	Protective	Protective	Articular cavity	Rat	2004-03-29	Takigawa M	Exogenous	Protein	MIA	Ambiguous	6
16646035	CCN2	Overexpression	Spontaneous	Detrimental	Detrimental	Articular cavity	Mouse	2006-05-01	van der Kraan PM	Exogenous	Viral	Ageing	Ambiguous	6
25541297	CCN3	Removal	Spontaneous	Detrimental	Protective	Global	Mouse	2014-12-22	Boulter CA	Genetic		Ageing	Protective	1
28735021	CCN4	Removal	Surgical - DMM	Protective	Detrimental	Global	Mouse	2017-07-19	Young MF	Genetic		Surgical	Ambiguous	6
28735021	CCN4	Removal	Spontaneous	No effect	No effect	Global	Mouse	2017-07-19	Young MF	Genetic		Ageing	Ambiguous	6
28735021	CCN4	Removal	Surgical - ACLT	Protective	Detrimental	Global	Mouse	2017-07-19	Young MF	Genetic		Surgical	Ambiguous	6
28735021	CCN4	Removal	Collagenase	Protective	Detrimental	Global	Mouse	2017-07-19	Young MF	Genetic		Protease	Ambiguous	6
19180479	CCN4	Overexpression	Surgical - DMM	Detrimental	Detrimental	Articular cavity	Mouse	2009-02-01	van den Berg WB	Exogenous	Viral	Surgical	Ambiguous	6
25976248	CCN4	Overexpression	Spontaneous	Detrimental	Detrimental	Articular cavity	Mouse	2015-05-12	van der Kraan PM	Exogenous	Viral	Ageing	Ambiguous	6
32006659	CCR1	Inhibition	Collagenase	Protective	Detrimental	systemic	Mouse	2020-01-29	Meng F	Exogenous	BX471	Protease	Detrimental	1
27965260	CCR2	Removal	Surgical - DMM	Protective	Detrimental	Global	Mouse	2016-12-13	Robinson WH	Genetic		Surgical	Ambiguous	10
31424112	CCR2	Removal	Surgical -ACLT	Protective	Detrimental	Global	Mouse	2019-08-30	Krawetz RJ	Genetic		Surgical	Ambiguous	10
31424112	CCR2	Removal	Spontaneous	No effect	No effect	Global	Mouse	2019-08-30	Krawetz RJ	Genetic		Ageing	Ambiguous	10
31424112	CCR2	Removal	Surgical - Cartilage Injury	Protective	Detrimental	Global	Mouse	2019-08-30	Krawetz RJ	Genetic		Surgical	Ambiguous	10
27746376	CCR2	Removal	Surgical - DMM	Protective	Detrimental	Global	Mouse	2016-10-13	Vincent TL	Genetic		Surgical	Ambiguous	10
23185004	CCR2	Removal	Surgical - DMM	No effect	No effect	Global	Mouse	2012-11-26	Malfait AM	Genetic		Surgical	Ambiguous	10
26138996	CCR2	inhibitor	Surgical - ACLT+MM	Protective	Detrimental	systemic	Rat	2015-10-01	Beier F	Exogenous	RS504393	Surgical	Ambiguous	10
27856294	CCR2	Inhibition	Surgical - DMM	Protective	Detrimental	systemic	Mouse	2016-11-14	Spagnoli A	Exogenous	RS504393	Surgical	Ambiguous	10
27965260	CCR2	Inhibition	Surgical - DMM	Protective	Detrimental	systemic	Mouse	2016-12-13	Robinson WH	Exogenous	RS-504393	Surgical	Ambiguous	10
32006659	CCR2	Inhibition	Collagenase	Protective	Detrimental	systemic	Mouse	2020-01-29	Meng F	Exogenous	RS504393	Protease	Ambiguous	10
29622035	CCR4	Removal	Collagenase	Protective	Detrimental	Global	Mouse	2018-04-05	Cook AD	Genetic		Protease	Detrimental	1
27965260	CCR5	Removal	Surgical - DMM	No effect	No effect	Global	Mouse	2016-12-13	Robinson WH	Genetic		Surgical	Ambiguous	2
25498590	CCR5	Removal	Surgical - DMM	Protective	Detrimental	Global	Mouse	2014-12-09	Sandell LJ	Genetic		Surgical	Ambiguous	2
28767178	CCR7	Removal	Surgical - DMM	Protective	Detrimental	Global	Mouse	2017-08-29	Scanzello CR	Genetic		Surgical	Detrimental	1
30485272	CD14	Removal	Surgical - DMM	Protective	Detrimental	Global	Mouse	2018-11-28	Scanzello CR	Genetic		Surgical	Detrimental	1
30791745	CD274	Inhibition	Collagenase	Detrimental	Protective	systemic	Mouse	2019-01-01	Gao C	Exogenous	Antibody	Protease	Protective	2
30791745	CD274	Inhibition	Surgical - ACLT	Detrimental	Protective	systemic	Mouse	2019-01-01	Gao C	Exogenous	Antibody	Surgical	Protective	2
31534047	CD47	Removal	Surgical - DMM	Protective	Detrimental	Global	Mouse	2019-09-19	Robinson WH	Genetic		Surgical	Detrimental	2
31534047	CD47	Inhibition	Surgical - DMM	Protective	Detrimental	systemic	Mouse	2019-09-19	Robinson WH	Exogenous	Antibody	Surgical	Detrimental	2
22057346	CD59	Removal	Surgical - DMM	Detrimental	Protective	Global	Mouse	2011-11-06	Robinson WH	Genetic		Surgical	Protective	2
22057346	CD59	Removal	Surgical - MM	Detrimental	Protective	Global	Mouse	2011-11-06	Robinson WH	Genetic		Surgical	Protective	2
27784871	CD9	Removal	Surgical - MML+MCL	No effect	No effect	Global	Mouse	2016-01-01	Ochi M	Genetic		Surgical	Ambiguous	2
27784871	CD9	Removal	Spontaneous	Protective	Detrimental	Global	Mouse	2016-01-01	Ochi M	Genetic		Ageing	Ambiguous	2
29314205	CDC42	Removal	Surgical - DMM	Protective	Detrimental	Global	Mouse	2018-02-15	Wu X	Genetic		Surgical	Detrimental	2
29314205	CDC42	Inhibition	Surgical - DMM	Protective	Detrimental	Articular cavity	Mouse	2018-02-15	Wu X	Exogenous	ZCL278	Surgical	Detrimental	2
31307784	CDK9	Inhibition	Surgical - ACLT	Protective	Detrimental	Articular cavity	Mouse	2019-07-13	Ma J	Exogenous	CDK9	Surgical	Detrimental	1
28128866	CDKN1A	Removal	Surgical - DMM	Detrimental	Protective	Global	Mouse	2017-01-27	Kuroda R	Genetic		Surgical	Protective	2
26546411	CDKN1A	Removal	Surgical - DMM	Detrimental	Protective	Global	Mouse	2015-11-07	Kuroda R	Genetic		Surgical	Protective	2
29744983	CDKN2A	Removal	Surgical - DMM	No effect	No effect	Cartilage Inducible	Mouse	2018-05-09	Sharpless NE	Genetic		Surgical	Ambiguous	3
29744983	CDKN2A	Removal	Spontaneous	No effect	No effect	Cartilage Inducible	Mouse	2018-05-09	Sharpless NE	Genetic		Ageing	Ambiguous	3
31644429	CDKN2A	Removal	Collagenase	Protective	Detrimental	Global	Mouse	2019-10-22	Brondello JM	Genetic		Protease	Ambiguous	3
22095691	CEBPB	Haploinsufficiency	Surgical - DMM	Protective	Detrimental	Global	Mouse	2011-11-17	Kawaguchi H	Genetic		Surgical	Detrimental	2
22095691	CEBPB	Haploinsufficiency	Spontaneous	Protective	Detrimental	Global	Mouse	2011-11-17	Kawaguchi H	Genetic		Ageing	Detrimental	2
29074298	CETP	Removal	High Fat Diet	Detrimental	Protective	Global	Mouse	2017-10-24	Stoop R	Genetic		High Fat Diet	Protective	1
29982662	CFD	Removal	Surgical - DMM	Protective	Detrimental	Global	Mouse	2018-10-01	Martel-Pelletier J	Genetic		Surgical	Detrimental	2
32012117	CFD	Removal	Spontaneous	Protective	Detrimental	Global	Mouse	2020-02-01	Martel-Pelletier J	Genetic		Ageing	Detrimental	2
30728500	CH25H	Removal	High Fat Diet	Protective	Detrimental	Global	Mouse	2019-02-06	Chun JS	Genetic		High Fat Diet	Detrimental	3
30728500	CH25H	Removal	Surgical - DMM	Protective	Detrimental	Global	Mouse	2019-02-06	Chun JS	Genetic		Surgical	Detrimental	3
30728500	CH25H	Overexpression	Surgical - DMM	Detrimental	Detrimental	Articular cavity	Mouse	2019-02-06	Chun JS	Exogenous	Viral	Surgical	Detrimental	3
32638534	CHRNA7	Removal	Surgical – MM	Detrimental	Protective	Global	Mouse	2020-07-08	Sellam J	Genetic		Surgical	Protective	1
31222033	CHUK	Removal	Surgical - DMM	Protective	Detrimental	Cartilage Inducible	Mouse	2019-06-20	Otero M	Genetic		Surgical	Detrimental	2
30405206	CHUK	Inhibition	Surgical - DMM + MM	Protective	Detrimental	Articular cavity	Mouse	2018-11-07	Saito T	Exogenous	BMS-345541	Surgical	Detrimental	2
31132406	CLK2	Inhibition	MIA	Protective	Detrimental	Articular cavity	Rat	2019-05-25	Yazici Y	Exogenous	Lorecivivint	MIA	Detrimental	1
30716535	CLOCK	Inhibition	Spontaneous	Detrimental	Protective	Global	Mouse	2019-02-02	Qian R	Genetic		Ageing	Ambiguous	2
25655021	CLOCK	Mutation	Spontaneous	No effect	No effect	Global	Mouse	2015-09-01	Im HJ	Genetic		Ageing	Ambiguous	2
25937028	CNR2	Removal	Surgical - DMM	Detrimental	Protective	Global	Mouse	2015-04-30	Ralston SH	Genetic		Surgical	Protective	3
25937028	CNR2	Removal	Spontaneous	Detrimental	Protective	Global	Mouse	2015-04-30	Ralston SH	Genetic		Ageing	Protective	3
25937028	CNR2	Activation	Surgical - DMM	Protective	Protective	systemic	Mouse	2015-04-30	Ralston SH	Exogenous	HU308	Surgical	Protective	3
28898438	COL11A1	Mutation	Cyclic	Detrimental	Protective	Global	Mouse	2017-10-31	van der Meulen MCH	Genetic		Surgical	Protective	4
27031305	COL11A1	Mutation	Surgical - TMJ	Detrimental	Protective	Global	Mouse	2016-03-16	Seegmiller R	Genetic		Surgical	Protective	4
15023383	COL11A1	Mutation	Spontaneous	Detrimental	Protective	Global	Mouse	2004-04-01	Bridgewater LC	Genetic		Ageing	Protective	4
13130470	COL11A1	Mutation	Spontaneous	Detrimental	Protective	Global	Mouse	2003-09-01	Li Y	Genetic		Ageing	Protective	4
11668593	COL11A2	Removal	Spontaneous	No effect	No effect	Global	Mouse	2001-10-01	Mayne R	Genetic		Ageing	No effect	1
18383364	COL1A1	Mutation	Spontaneous	Detrimental	Protective	Global	Mouse	2008-04-01	Lipsky PE	Genetic		Ageing	Protective	1
27031305	COL2A1	Mutation	Surgical - TMJ	Detrimental	Protective	Global	Mouse	2016-03-16	Seegmiller R	Genetic		Surgical	Protective	11
23939426	COL2A1	Mutation	Spontaneous	Detrimental	Protective	Global	Mouse	2013-08-09	Seegmiller RE	Genetic		Ageing	Protective	11
23518238	COL2A1	Mutation	Spontaneous	Detrimental	Protective	Global	Mouse	2013-03-19	Seegmiller RE	Genetic		Ageing	Protective	11
22155431	COL2A1	Mutation	Spontaneous	Detrimental	Protective	Global	Mouse	2011-11-26	Seegmiller RE	Genetic		Ageing	Protective	11
22028304	COL2A1	Mutation	Spontaneous	Detrimental	Protective	Global	Mouse	2012-02-01	Thakker RV	Genetic		Ageing	Protective	11
16431140	COL2A1	Mutation	Spontaneous	Detrimental	Protective	Global	Mouse	2006-01-20	Seegmiller RE	Genetic		Ageing	Protective	11
15476249	COL2A1	Mutation	Spontaneous	Detrimental	Protective	Global	Mouse	2004-10-01	Lammi MJ	Genetic		Ageing	Protective	11
10943864	COL2A1	Mutation	Spontaneous	Detrimental	Protective	Global	Mouse	2000-08-01	Vuorio E	Genetic		Ageing	Protective	11
10903878	COL2A1	Mutation	Spontaneous	Detrimental	Protective	Global	Mouse	2000-07-01	Metsäranta MP	Genetic		Ageing	Protective	11
11171689	COL2A1	Deficiency	Spontaneous	Detrimental	Protective	Global	Mouse	2001-03-01	Helminen HJ	Genetic		Ageing	Protective	11
31958497	COL2A1	Mutation	Spontaneous	Detrimental	Protective	Global	Mouse	2020-01-17	Oheim R	Genetic		Ageing	Protective	11
25797646	COL5A1	Removal	Spontaneous	Detrimental	Protective	Tendons	Mouse	2015-03-20	Birk DE	Genetic		Ageing	Protective	1
22448243	COL6A1	Removal	Spontaneous	Detrimental	Protective	Global	Mouse	2012-03-20	Guilak F	Genetic		Ageing	Protective	1
20360435	COL9A1	Removal	Spontaneous	Detrimental	Protective	Global	Mouse	2010-04-01	Griffin TM	Genetic		Ageing	Protective	3
18163498	COL9A1	Removal	Spontaneous	Detrimental	Protective	Global	Mouse	2008-01-01	Setton LA	Genetic		Ageing	Protective	3
16947423	COL9A1	Removal	Spontaneous	Detrimental	Protective	Global	Mouse	2006-09-01	Li Y	Genetic		Ageing	Protective	3
17588960	COMP	Mutation	Spontaneous	Detrimental	Protective	Global	Mouse	2007-06-22	Briggs MD	Genetic		Ageing	Protective	1
30826358	CORT	Removal	Spontaneous	Detrimental	Protective	Global	Mouse	2019-02-28	Li W	Genetic		Ageing	Protective	3
30826358	CORT	Removal	Surgical - DMM	Detrimental	Protective	Global	Mouse	2019-02-28	Li W	Genetic		Surgical	Protective	3
30826358	CORT	exogenous	Surgical - DMM	Protective	Protective	Articular cavity	Mouse	2019-02-28	Li W	Exogenous	corstatin	Surgical	Protective	3
24449579	CPB2	Removal	Surgical - DMM	Detrimental	Protective	Global	Mouse	2014-01-01	Robinson WH	Genetic		Surgical	Protective	1
29074298	CRP	Overexpression	High Fat Diet	Detrimental	Detrimental	Global	Mouse	2017-10-24	Stoop R	Genetic		High Fat Diet	Detrimental	2
30248505	CRP	Overexpression	High Fat Diet	Detrimental	Detrimental	Global	Mouse	2018-09-22	Stoop R	Genetic		High Fat Diet	Detrimental	2
27415616	CRTAC1	Removal	Surgical - DMM	Protective	Detrimental	Global	Mouse	2016-07-14	Aliprantis AO	Genetic		Surgical	Detrimental	1
32339698	CRY1	Removal	Surgical – DMM	No effect	No effect	Global	Mouse	2020-04-24	Lotz M	Genetic		Surgical	No effect	1
32339698	CRY2	Removal	Surgical – DMM	Detrimental	Protective	Global	Mouse	2020-04-24	Lotz M	Genetic		Surgical	Protective	1
22995428	CSF2	Removal	Collagenase	Protective	Detrimental	Global	Mouse	2012-09-20	Hamilton JA	Genetic		Protease	Detrimental	2
32028021	CSF2	Inhibition	Collagenase	Protective	Detrimental	Articular cavity	Mouse	2020-02-03	Cook AD	Exogenous	Antibody	Protease	Detrimental	2
25655021	CSNK1E	Mutation	Spontaneous	No effect	No effect	Global	Mouse	2015-09-01	Im HJ	Genetic		Ageing	Ambiguous	2
32175635	CSNK1E	Inhibition	Surgical - ACLT	Protective	Detrimental	systemic	Mouse	2020-03-16	Rong L	Exogenous	PF4800567	Surgical	Ambiguous	2
25592743	CST3	Overexpression	Surgical - ACLT	No effect	No effect	Articular cavity	Rabbit	2015-01-16	Matthews GL	Exogenous	Viral	Surgical	No effect	1
30912140	CTNNB1	Activated	Spontaneous	Detrimental	Detrimental	Cartilage	Mouse	2019-03-25	Jin H	Genetic		Ageing	Ambiguous	6
29686224	CTNNB1	Activated	Spontaneous	Detrimental	Detrimental	Cartilage Inducible	Mouse	2018-04-23	Chen D	Genetic		Ageing	Ambiguous	6
27018594	CTNNB1	Activated	Surgical - DMM	Protective	Protective	Cartilage Inducible	Mouse	2016-03-28	Alman BA	Genetic		Surgical	Ambiguous	6
25340802	CTNNB1	Removal	Spontaneous	Detrimental	Protective	Cartilage Inducible	Mouse	2014-10-23	Chen D	Genetic		Ageing	Ambiguous	6
18767925	CTNNB1	Activated	Spontaneous	Detrimental	Detrimental	Cartilage Inducible	Mouse	2009-01-01	Chen D	Genetic		Ageing	Ambiguous	6
18576323	CTNNB1	Inhibition	Spontaneous	Detrimental	Protective	Cartilage	Mouse	2008-07-01	Chen D	Genetic		Ageing	Ambiguous	6
29781506	CTSK	Removal	Surgical - DMM	Protective	Detrimental	Global	Mouse	2018-05-21	Drissi H	Genetic		Surgical	Ambiguous	7
22484689	CTSK	Removal	Surgical - ACLT	Protective	Detrimental	Cartilage	Mouse	2012-03-30	Duong LT	Genetic		Surgical	Ambiguous	7
21968827	CTSK	Removal	Surgical - DMM + MM+ACL	Protective	Detrimental	Global	Mouse	2012-02-01	Ishiguro N	Genetic		Surgical	Ambiguous	7
19644873	CTSK	Knockdown	Surgical - ACLT	Detrimental	Protective	Articular cavity	Rabbit	2009-08-01	Uede T	Exogenous	sirna	Surgical	Ambiguous	7
22484689	CTSK	Inhibition	Surgical - ACLT	Protective	Detrimental	systemic	Rabbit	2012-03-30	Duong LT	Exogenous	L-006235	Surgical	Ambiguous	7
29523155	CTSK	Inhibition	Surgical - ACLT	Protective	Detrimental	Articular cavity	Rabbit	2018-03-09	Grabowska U	Exogenous	MIV-711	Surgical	Ambiguous	7
29523155	CTSK	Inhibition	Surgical - MM	Protective	Detrimental	Articular cavity	Dog	2018-03-09	Grabowska U	Exogenous	MIV-711	Surgical	Ambiguous	7
25135253	CXCR2	Removal	Surgical - DMM	Detrimental	Protective	Global	Mouse	2014-08-18	Dell'Accio F	Genetic		Surgical	Protective	1
28108560	CXCR3	Removal	Collagenase	Protective	Detrimental	Global	Mouse	2017-01-20	Bernardini G	Genetic		Protease	Detrimental	1
25732515	CXCR4	Inhibition	Surgical - DMM	Protective	Detrimental	systemic	Mouse	2015-04-24	Wei L	Exogenous	AMD3100	Surgical	Detrimental	5
26851314	CXCR4	Inhibition	MIA	Protective	Detrimental	Articular cavity	Rat	2016-01-07	Ji P	Exogenous	AMD3100	MIA	Detrimental	5
27322244	CXCR4	Inhibition	Surgical - ACLT	Protective	Detrimental	systemic	Mouse	2016-06-16	Chen A	Exogenous	AMD3100	Surgical	Detrimental	5
27690009	CXCR4	Inhibition	Surgical - DMM	Protective	Detrimental	systemic	Rat	2016-09-29	Chen A	Exogenous	AMD3100	Surgical	Detrimental	5
31108241	CXCR4	Inhibition	Surgical - ACLT	Protective	Detrimental	systemic	Mouse	2019-05-17	Cui Z	Exogenous	AMD3100	Surgical	Detrimental	5
30728500	CYP7B1	Overexpression	Surgical - DMM	Detrimental	Detrimental	Articular cavity	Mouse	2019-02-06	Chun JS	Exogenous	Viral	Surgical	Detrimental	2
30728500	CYP7B1	Knockdown	Surgical - DMM	Protective	Detrimental	Articular cavity	Mouse	2019-02-06	Chun JS	Exogenous	siRNA	Surgical	Detrimental	2
21652695	CYTL1	Removal	Surgical - DMM	Detrimental	Protective	Global	Mouse	2011-06-07	Chun JS	Genetic		Surgical	Protective	1
27377816	DCN	Removal	Treadmill	Protective	Detrimental	Global	Mouse	2016-07-04	Dreier R	Genetic		Exercise	Ambiguous	3
32162789	DCN	Removal	Surgical - DMM	Detrimental	Protective	Global	Mouse	2020-03-12	Han L	Genetic		Surgical	Ambiguous	3
32162789	DCN	Removal	Surgical - DMM	Detrimental	Protective	Global Inducible	Mouse	2020-03-12	Han L	Genetic		Surgical	Ambiguous	3
24795271	DDIT3	Removal	Surgical - DMM + MM	Protective	Detrimental	Global	Mouse	2014-05-02	Mizuta H	Genetic		Surgical	Detrimental	1
28334504	DDIT4	Removal	Surgical - DMM	Detrimental	Protective	Global	Mouse	2017-06-02	Lotz MK	Genetic		Surgical	Protective	1
23912900	DDR1	Removal	Spontaneous	Detrimental	Protective	Global	Mouse	2013-08-04	Miosge N	Genetic		Ageing	Protective	1
29073363	DDR2	Removal	Spontaneous	No effect	No effect	Global	Mouse	2017-10-26	Franceschi RT	Genetic		Ageing	Ambiguous	6
27640147	DDR2	Removal	Surgical - DMM	Protective	Detrimental	Cartilage Inducible	Mouse	2016-09-16	Xu L	Genetic		Surgical	Ambiguous	6
24822272	DDR2	Deficiency	Col11a1 haploinsufficient	Protective	Detrimental	Global	Mouse	2014-04-01	Xu L	Genetic		Genetic	Ambiguous	6
21855682	DDR2	Deficiency	Surgical - DMM	Protective	Detrimental	Cartilage Inducible	Mouse	2011-09-01	Li Y	Genetic		Surgical	Ambiguous	6
20518074	DDR2	Haploinsufficiency	Surgical - DMM	Protective	Detrimental	Global	Mouse	2010-09-01	Li Y	Genetic		Surgical	Ambiguous	6
20518074	DDR2	Haploinsufficiency	Col11a1 haploinsufficient	Protective	Detrimental	Global	Mouse	2010-09-01	Li Y	Genetic		Genetic	Ambiguous	6
31350386	DGCR8	Overexpression	Surgical - ACLT	Protective	Protective	Articular cavity	Mouse	2019-07-26	Liu GH	Exogenous	Viral	Surgical	Protective	2
31350386	DGCR8	Overexpression	Spontaneous	Protective	Protective	Articular cavity	Mouse	2019-07-26	Liu GH	Exogenous	Viral	Ageing	Protective	2
25549200	DIO1	Removal	Spontaneous	No effect	No effect	Global	Mouse	2015-02-03	Williams GR	Genetic		Ageing	No effect	1
25550340	DIO2	Removal	Treadmill	Protective	Detrimental	Global	Mouse	2014-12-30	Lories RJ	Genetic		Exercise	Ambiguous	2
25549200	DIO2	Removal	Spontaneous	No effect	No effect	Global	Mouse	2015-02-03	Williams GR	Genetic		Ageing	Ambiguous	2
25080367	DKK1	Overexpression	Surgical - MM	Protective	Protective	Bone	Mouse	2014-11-01	Cohen-Solal M	Genetic		Surgical	Ambiguous	5
22488261	DKK1	Overexpression	Surgical - DMM	Protective	Protective	Cartilage	Mouse	2012-08-01	Chun JS	Genetic		Surgical	Ambiguous	5
20131282	DKK1	Knockdown	Surgical - ACLT	Protective	Detrimental	systemic	Mouse	2010-05-01	Wang FS	Exogenous	shRNA	Surgical	Ambiguous	5
20131282	DKK1	Knockdown	Collagenase	Protective	Detrimental	systemic	Mouse	2010-05-01	Wang FS	Exogenous	shRNA	Protease	Ambiguous	5
22488261	DKK1	Overexpression	Surgical - DMM	Protective	Protective	Articular cavity	Mouse	2012-08-01	Chun JS	Exogenous	Viral	Surgical	Ambiguous	5
22488261	DKK2	Overexpression	Surgical - DMM	No effect	No effect	Cartilage	Mouse	2012-08-01	Chun JS	Genetic		Surgical	No effect	1
27315306	DLX2	Overexpression	Spontaneous	Detrimental	Detrimental	Neural crest cells	Mouse	2016-06-17	Shen G	Genetic		Ageing	Detrimental	1
28759313	DMP1	Mutation	Spontaneous	Detrimental	Protective	Global	Mouse	2017-07-31	Sun Y	Genetic		Ageing	Protective	2
27766035	DMP1	Removal	Spontaneous	Detrimental	Protective	Cartilage	Mouse	2016-09-15	Feng JQ	Genetic		Ageing	Protective	2
25368604	DNAJC3	Removal	Spontaneous	Detrimental	Protective	Global	Mouse	2014-10-17	Mason DJ	Genetic		Ageing	Protective	1
30972197	DNMT3B	Removal	Surgical - TMJ	Detrimental	Protective	Cartilage Inducible	Mouse	2019-03-15	Mao JJ	Genetic		Surgical	Protective	4
28614801	DNMT3B	Loss of function	Spontaneous	Detrimental	Protective	Cartilage Inducible	Mouse	2017-06-15	O'Keefe RJ	Genetic		Ageing	Protective	4
28614801	DNMT3B	Gain of function	Surgical - DMM	Protective	Protective	Cartilage Inducible	Mouse	2017-06-15	O'Keefe RJ	Genetic		Surgical	Protective	4
30972197	DNMT3B	Overexpression	MIA	Protective	Protective	Articular cavity	Mouse	2019-03-15	Mao JJ	Exogenous	Viral	MIA	Protective	4
30513362	DOT1L	Removal	Spontaneous	Detrimental	Protective	Cartilage Inducible	Mouse	2018-12-01	Monteagudo S	Genetic		Ageing	Protective	3
30513362	DOT1L	Removal	Surgical - DMM	Detrimental	Protective	Cartilage Inducible	Mouse	2018-12-01	Monteagudo S	Genetic		Surgical	Protective	3
28627522	DOT1L	Inhibition	Spontaneous	Detrimental	Protective	Articular cavity	Mouse	2017-06-19	Lories RJ	Exogenous	EPZ-5676	Ageing	Protective	3
25707934	DROSHA	Removal	Spontaneous	Detrimental	Protective	Cartilage Inducible	Mouse	2015-02-21	Chong MW	Genetic		Ageing	Protective	1
26562438	DUSP1	Removal	Spontaneous	No effect	No effect	Global	Mouse	2015-11-12	Beier F	Genetic		Ageing	No effect	1
31132406	DYRK1A	Inhibition	MIA	Protective	Detrimental	Articular cavity	Rat	2019-05-25	Yazici Y	Exogenous	Lorecivivint	MIA	Detrimental	1
27505251	EDIL3	Removal	Surgical - DMM	Detrimental	Protective	Global	Mouse	2016-08-09	Yang GP	Genetic		Surgical	Protective	1
27780308	EFEMP1	Removal	Spontaneous	Detrimental	Protective	Global	Mouse	2017-03-01	Lotz MK	Genetic		Ageing	Protective	2
27780308	EFEMP1	Removal	Surgical - MML+MCL	Detrimental	Protective	Global	Mouse	2017-03-01	Lotz MK	Genetic		Surgical	Protective	2
26980243	EFNB2	Removal	Spontaneous	Detrimental	Protective	Cartilage	Mouse	2016-03-15	Martel-Pelletier J	Genetic		Ageing	Protective	1
29898872	EGFR	Removal	Surgical - DMM	Protective	Detrimental	Cartilage Inducible	Mouse	2018-06-11	Ouyang H	Genetic		Surgical	Ambiguous	11
29024567	EGFR	Removal	Surgical - DMM	Detrimental	Protective	Cartilage	Mouse	2017-12-29	Qin L	Genetic		Surgical	Ambiguous	11
29024567	EGFR	Removal	Spontaneous	Detrimental	Protective	Cartilage	Mouse	2017-12-29	Qin L	Genetic		Ageing	Ambiguous	11
29024567	EGFR	Removal	Surgical - DMM + MM	Detrimental	Protective	Cartilage	Mouse	2017-12-29	Qin L	Genetic		Surgical	Ambiguous	11
27911782	EGFR	Removal	Spontaneous	Detrimental	Protective	Cartilage	Mouse	2016-11-28	Qin L	Genetic		Ageing	Ambiguous	11
27911782	EGFR	Removal	Surgical - DMM	Detrimental	Protective	Cartilage	Mouse	2016-11-28	Qin L	Genetic		Surgical	Ambiguous	11
26120493	EGFR	Inhibition	Surgical - DMM	Detrimental	Protective	Global	Mouse	2014-08-05	Qin L	Genetic		Surgical	Ambiguous	11
26120493	EGFR	Inhibition	Surgical - DMM	Detrimental	Protective	systemic	Mouse	2014-08-05	Qin L	Exogenous	gefitinib	Surgical	Ambiguous	11
26138996	EGFR	inhibitor	Surgical - ACLT+MM	Protective	Detrimental	systemic	Rat	2015-10-01	Beier F	Exogenous	AG1478	Surgical	Ambiguous	11
28757192	EGFR	Inhibition	Surgical - DMM	Protective	Detrimental	Articular cavity	Rabbit	2017-07-28	Ouyang H	Exogenous	gefitinib	Surgical	Ambiguous	11
29898872	EGFR	Inhibition	Surgical - DMM	Protective	Detrimental	Articular cavity	Mouse	2018-06-11	Ouyang H	Exogenous	Gefitinib	Surgical	Ambiguous	11
28349987	EGLN1	Removal	Spontaneous	Detrimental	Protective	Cartilage	Mouse	2017-03-28	Mohan S	Genetic		Ageing	Protective	1
29691435	ELF3	Overexpression	Surgical - DMM	Detrimental	Detrimental	Cartilage Inducible	Mouse	2018-04-24	Otero M	Genetic		Surgical	Detrimental	2
29691435	ELF3	Removal	Surgical - DMM	Protective	Detrimental	Cartilage	Mouse	2018-04-24	Otero M	Genetic		Surgical	Detrimental	2
29488175	ENG	Removal	Surgical - DMM	No effect	No effect	Global	Mouse	2018-02-27	Philip A	Genetic		Surgical	No effect	1
30111653	ENPP1	Removal	Spontaneous	Detrimental	Protective	Global	Mouse	2018-09-20	Yang Y	Genetic		Ageing	Protective	3
22510396	ENPP1	Mutation	Spontaneous	Detrimental	Protective	Global	Mouse	2012-04-17	Pap T	Genetic		Ageing	Protective	3
32371389	ENPP1	Mutation	Spontaneous	Detrimental	Protective	Global	Mouse	2020-05-05	Pap T	Genetic		Ageing	Protective	3
24347567	EPAS1	Removal	Surgical - DMM	Protective	Detrimental	Cartilage	Mouse	2013-12-17	Chun JS	Genetic		Surgical	Detrimental	9
21869830	EPAS1	Removal	Surgical - DMM	Protective	Detrimental	Cartilage	Mouse	2011-08-26	Chun JS	Genetic		Surgical	Detrimental	9
20495569	EPAS1	Overexpression	Spontaneous	Detrimental	Detrimental	Cartilage	Mouse	2010-05-23	Chun JS	Genetic		Ageing	Detrimental	9
20495569	EPAS1	Haploinsufficiency	Collagenase	Protective	Detrimental	Global	Mouse	2010-05-23	Chun JS	Genetic		Protease	Detrimental	9
20495569	EPAS1	Haploinsufficiency	Surgical - DMM	Protective	Detrimental	Global	Mouse	2010-05-23	Chun JS	Genetic		Surgical	Detrimental	9
20495569	EPAS1	Overexpression	Spontaneous	Detrimental	Detrimental	Articular cavity	Mouse	2010-05-23	Chun JS	Exogenous	Viral	Ageing	Detrimental	9
21869830	EPAS1	Overexpression	Surgical - DMM	Detrimental	Detrimental	Articular cavity	Mouse	2011-08-26	Chun JS	Exogenous	Viral	Surgical	Detrimental	9
26241779	EPAS1	Overexpression	Spontaneous	Detrimental	Detrimental	Articular cavity	Mouse	2015-08-01	Chun JS	Exogenous	Viral	Ageing	Detrimental	9
31357086	EPAS1	Knockdown	Surgical - DMM	Protective	Detrimental	Articular cavity	Mouse	2019-07-26	Li X	Exogenous	siRNA	Surgical	Detrimental	9
25453723	EPHB4	Overexpression	Surgical - DMM	Protective	Protective	Bone	Mouse	2014-11-29	Martel-Pelletier J	Genetic		Surgical	Protective	3
25453723	EPHB4	Overexpression	Spontaneous	Protective	Protective	Bone	Mouse	2014-11-29	Martel-Pelletier J	Genetic		Ageing	Protective	3
22833446	EPHB4	Overexpression	Surgical - DMM	Protective	Protective	Bone	Mouse	2012-11-01	Martel-Pelletier J	Genetic		Surgical	Protective	3
19932218	EPYC	Removal	Spontaneous	Detrimental	Protective	Global	Mouse	2009-11-18	Höök M	Genetic		Ageing	Protective	1
26097038	ERG	Removal	Surgical - DMM + MM	Detrimental	Protective	Joints	Mouse	2015-10-01	Iwamoto M	Genetic		Surgical	Protective	2
26097038	ERG	Removal	Spontaneous	Detrimental	Protective	Joints	Mouse	2015-10-01	Iwamoto M	Genetic		Ageing	Protective	2
24966136	ERRFI1	Removal	Spontaneous	Detrimental	Protective	Cartilage	Mouse	2014-10-01	Beier F	Genetic		Ageing	Ambiguous	6
24670222	ERRFI1	Removal	Surgical - DMM +MM	Detrimental	Protective	Global	Mouse	2014-03-27	Williams BO	Genetic		Surgical	Ambiguous	6
24550287	ERRFI1	Removal	Spontaneous	Detrimental	Protective	Cartilage	Mouse	2014-02-03	Zhang YW	Genetic		Ageing	Ambiguous	6
23705804	ERRFI1	Removal	Spontaneous	Detrimental	Protective	Forelimb	Mouse	2013-01-01	Dealy CN	Genetic		Ageing	Ambiguous	6
16087873	ERRFI1	Removal	Spontaneous	Detrimental	Protective	Global	Mouse	2005-08-08	Vande Woude GF	Genetic		Ageing	Ambiguous	6
32430054	ERRFI1	Overexpression	Spontaneous	Detrimental	Detrimental	Cartilage	Mouse	2020-05-19	Beier F	Genetic		Ageing	Ambiguous	6
19410028	ESR1	Removal	Spontaneous	No effect	No effect	Global	Mouse	2009-04-17	Weinans H	Genetic		Ageing	No effect	1
19410028	ESR2	Removal	Spontaneous	No effect	No effect	Global	Mouse	2009-04-17	Weinans H	Genetic		Ageing	No effect	1
29247173	ESRRG	Overexpression	Surgical - DMM	Detrimental	Detrimental	Cartilage	Mouse	2017-12-15	Chun JS	Genetic		Surgical	Detrimental	5
29247173	ESRRG	Removal	Surgical - DMM	Protective	Detrimental	Global	Mouse	2017-12-15	Chun JS	Genetic		Surgical	Detrimental	5
29247173	ESRRG	Overexpression	Spontaneous	Detrimental	Detrimental	Articular cavity	Mouse	2017-12-15	Chun JS	Exogenous	Viral	Ageing	Detrimental	5
29247173	ESRRG	Knockdown	Surgical - DMM	Protective	Detrimental	Articular cavity	Mouse	2017-12-15	Chun JS	Exogenous	siRNA	Surgical	Detrimental	5
29247173	ESRRG	Inhibition	Surgical - DMM	Protective	Detrimental	systemic	Mouse	2017-12-15	Chun JS	Exogenous	GSK5182	Surgical	Detrimental	5
32612184	EVC	Removal	Surgical - DMM	No effect	No effect	Inducible	Mouse	2020-07-01	Herrero-Beaumont G	Genetic		Surgical	No effect	1
32315715	EXT1	Removal	Spontaneous	Protective	Detrimental	Cartilage Inducible	Mouse	2020-04-18	Vortkamp A	Genetic		Ageing	Detrimental	2
32315715	EXT1	Removal	Surgical – ACLT	Protective	Detrimental	Cartilage Inducible	Mouse	2020-04-18	Vortkamp A	Genetic		Surgical	Detrimental	2
30327434	EZH2	Removal	Spontaneous	No effect	No effect	Cartilage	Mouse	2018-10-16	van Wijnen AJ	Genetic		Ageing	Ambiguous	3
31910305	EZH2	Removal	Surgical - MM	Detrimental	Protective	Cartilage Inducible	Mouse	2020-01-07	Ouyang H	Genetic		Surgical	Ambiguous	3
27539752	EZH2	Inhibition	Surgical - ACLT	Protective	Detrimental	Articular cavity	Mouse	2016-08-19	Li F	Exogenous	EPZ005687	Surgical	Ambiguous	3
25200274	F2R	Removal	Surgical - DMM	No effect	No effect	Global	Mouse	2014-12-01	Little CB	Genetic		Surgical	No effect	1
26698846	F2RL1	Removal	Surgical - DMM	Protective	Detrimental	Global	Mouse	2015-12-23	Ferrell WR	Genetic		Surgical	Detrimental	10
25200274	F2RL1	Removal	Surgical - DMM	Protective	Detrimental	Global	Mouse	2014-12-01	Little CB	Genetic		Surgical	Detrimental	10
21285164	F2RL1	Removal	Surgical - DMM	Protective	Detrimental	Global	Mouse	2011-02-01	Boileau C	Genetic		Surgical	Detrimental	10
20584806	F2RL1	Removal	Surgical - DMM	Protective	Detrimental	Global	Mouse	2010-06-28	McInnes IB	Genetic		Surgical	Detrimental	10
20584806	F2RL1	Removal	Surgical - ACLT	Protective	Detrimental	Global	Mouse	2010-06-28	McInnes IB	Genetic		Surgical	Detrimental	10
20584806	F2RL1	Inhibition	Surgical - DMM	Protective	Detrimental	systemic	Mouse	2010-06-28	McInnes IB	Exogenous	Antibody	Surgical	Detrimental	10
20584806	F2RL1	Inhibition	Surgical - DMM	Protective	Detrimental	systemic	Mouse	2010-06-28	McInnes IB	Exogenous	p520	Surgical	Detrimental	10
31841119	F2RL1	Inhibition	Surgical - ACLT	Protective	Detrimental	Articular cavity	Rat	2019-12-16	You H	Exogenous	AZ3451	Surgical	Detrimental	10
32134473	F2RL1	Activation	Surgical - ACLT + MM	Detrimental	Detrimental	Articular cavity	Rat	2020-03-27	Chen H	Exogenous	SLIGRL-NH2	Surgical	Detrimental	10
32134473	F2RL1	Inhibition	Surgical - ACLT + MM	Protective	Detrimental	Articular cavity	Rat	2020-03-27	Chen H	Exogenous	FSLLRY-NH2	Surgical	Detrimental	10
29549054	FABP4	Removal	High Fat Diet	Protective	Detrimental	Global	Mouse	2018-03-13	Yan CH	Genetic		High Fat Diet	Detrimental	2
29549054	FABP4	Inhibition	High Fat Diet	Protective	Detrimental	systemic	Mouse	2018-03-13	Yan CH	Exogenous	BMS309403	High Fat Diet	Detrimental	2
27480933	FBXO32	Removal	Surgical - DMM	No effect	No effect	Global	Mouse	2016-07-30	Chun JS	Genetic		Surgical	No effect	2
27480933	FBXO32	Overexpression	Surgical - DMM	No effect	No effect	Articular cavity	Mouse	2016-07-30	Chun JS	Exogenous	Viral	Surgical	No effect	2
32409323	FBXO6	Removal	Surgical – ACLT	Detrimental	Protective	Global	Mouse	2020-05-14	Fan S	Genetic		Surgical	Protective	3
32409323	FBXO6	Removal	Surgical – ACLT	Detrimental	Protective	Cartilage Inducible	Mouse	2020-05-14	Fan S	Genetic		Surgical	Protective	3
32409323	FBXO6	Overexpression	Surgical - ACLT	Protective	Protective	Articular cavity	Mouse	2020-05-14	Fan S	Exogenous	Viral	Surgical	Protective	3
31084709	FCER1A	Removal	Surgical - DMM	Protective	Detrimental	Global	Mouse	2019-05-14	Robinson WH	Genetic		Surgical	Detrimental	1
25748082	FCER1G	Removal	Surgical - DMM	No effect	No effect	Global	Mouse	2015-03-04	Schett G	Genetic		Surgical	No effect	1
25748082	FCGR2B	Removal	Surgical - DMM	No effect	No effect	Global	Mouse	2015-03-04	Schett G	Genetic		Surgical	No effect	1
25585625	FFAR1	Removal	Surgical - DMM + MM	Detrimental	Protective	Global	Mouse	2015-01-13	Wittrant Y	Genetic		Surgical	Protective	1
30075737	FFAR4	Removal	Surgical - ACLT	Detrimental	Protective	Global	Mouse	2018-08-03	Leung PS	Genetic		Surgical	Protective	1
20733349	FGF1	Overexpression	Surgical - ACLT	Protective	Protective	Articular cavity	Rabbit	2010-10-31	Chen L	Exogenous	Viral	Surgical	Protective	1
15896984	FGF18	Exogenous	Surgical - DMM + Mesical tear	Protective	Protective	Articular cavity	Rat	2005-07-13	Ellsworth JL	Exogenous	Protein	Surgical	Protective	2
24577103	FGF18	Exogenous	Surgical - DMM + Mesical tear	Protective	Protective	Articular cavity	Rat	2014-02-27	Kawaguchi H	Exogenous	Protein	Surgical	Protective	2
27732085	FGF2	Overexpression	Spontaneous	Detrimental	Detrimental	Global	Mouse	2016-10-12	Hurley MM	Genetic		Ageing	Ambiguous	4
19565481	FGF2	Removal	Spontaneous	Detrimental	Protective	Global	Mouse	2009-07-01	Vincent T	Genetic		Ageing	Ambiguous	4
19565481	FGF2	Removal	Surgical - DMM	Detrimental	Protective	Global	Mouse	2009-07-01	Vincent T	Genetic		Surgical	Ambiguous	4
31901095	FGF2	Overexpression	Spontaneous	Detrimental	Detrimental	Global	Mouse	2020-01-01	Hurley MM	Genetic		Ageing	Ambiguous	4
29718273	FGF23	Inhibition	HMWTg	Protective	Detrimental	systemic	Mouse	2018-06-01	Hurley MM	Exogenous	Antibody	Genetic	Detrimental	1
29691281	FGFR1	Removal	Spontaneous	Protective	Detrimental	Cartilage Inducible	Mouse	2018-04-24	Chen L	Genetic		Ageing	Detrimental	6
29691281	FGFR1	Removal	Surgical - UAC	Protective	Detrimental	Cartilage Inducible	Mouse	2018-04-24	Chen L	Genetic		Surgical	Detrimental	6
22833219	FGFR1	Removal	Spontaneous	Protective	Detrimental	Cartilage Inducible	Mouse	2012-12-01	Chen L	Genetic		Ageing	Detrimental	6
22833219	FGFR1	Removal	Surgical - DMM	Protective	Detrimental	Cartilage Inducible	Mouse	2012-12-01	Chen L	Genetic		Surgical	Detrimental	6
27041213	FGFR1	Inhibition	Surgical - DMM	Protective	Detrimental	Articular cavity	Mouse	2016-04-04	Chen L	Exogenous	G141	Surgical	Detrimental	6
30201491	FGFR1	Inhibition	Surgical - DMM	Protective	Detrimental	Articular cavity	Mouse	2018-09-08	Chen L	Exogenous	peptide	Surgical	Detrimental	6
28520086	FGFR3	Activated	Surgical - DMM	Protective	Protective	Cartilage	Mouse	2017-06-06	Kitoh H	Genetic		Surgical	Ambiguous	9
28520086	FGFR3	Activated	Spontaneous	No effect	No effect	Cartilage	Mouse	2017-06-06	Kitoh H	Genetic		Ageing	Ambiguous	9
27159076	FGFR3	Removal	Surgical - DMM	Detrimental	Protective	Cartilage Inducible	Mouse	2016-10-01	Chen L	Genetic		Surgical	Ambiguous	9
27159076	FGFR3	Activated	Surgical - DMM	Protective	Protective	Cartilage Inducible	Mouse	2016-10-01	Chen L	Genetic		Surgical	Ambiguous	9
27159076	FGFR3	Activated	Spontaneous	Protective	Protective	Cartilage Inducible	Mouse	2016-10-01	Chen L	Genetic		Ageing	Ambiguous	9
27041063	FGFR3	Removal	Spontaneous	Detrimental	Protective	Cartilage Inducible	Mouse	2016-04-04	Chen L	Genetic		Ageing	Ambiguous	9
31662319	FGFR3	Removal	Surgical - DMM	Detrimental	Protective	Myeloid Inducible	Mouse	2019-10-29	Chen L	Genetic		Surgical	Ambiguous	9
31662319	FGFR3	Removal	Spontaneous	Detrimental	Protective	Myeloid Inducible	Mouse	2019-10-29	Chen L	Genetic		Ageing	Ambiguous	9
16624844	FGFR3	Removal	Spontaneous	Detrimental	Protective	Global	Mouse	2006-04-19	Henderson JE	Genetic		Ageing	Ambiguous	9
30144298	FLT4	Inhibition	Surgical - DMM	Detrimental	Protective	Articular cavity	Mouse	2019-01-05	Xing L	Exogenous	Antibody	Surgical	Protective	1
16006154	FMOD	Removal	Spontaneous	Detrimental	Protective	Global	Mouse	2005-09-01	Ameye LG	Genetic		Ageing	Protective	3
12089156	FMOD	Removal	Spontaneous	Detrimental	Protective	Global	Mouse	2002-06-27	Chakravarti S	Genetic		Ageing	Protective	3
11978731	FMOD	Removal	Spontaneous	Detrimental	Protective	Global	Mouse	2002-05-01	Young MF	Genetic		Ageing	Protective	3
29870552	FN1	Mutation	Surgical - MM+Forced Exercise	Detrimental	Protective	Cartilage	Mouse	2018-06-05	Costell M	Genetic		Surgical	Protective	1
31837247	FOXC1	Inhibition	Surgical - DMM	Protective	Detrimental	Articular cavity	Mouse	2019-12-14	Yin Z	Exogenous	siRNA	Surgical	Detrimental	1
30933975	FOXD1	Overexpression	Surgical - ACLT	Protective	Protective	Articular cavity	Mouse	2019-04-01	Liu GH	Exogenous	Viral	Surgical	Protective	1
29444976	FOXO1	Removal	Treadmill	Detrimental	Protective	Cartilage	Mouse	2018-02-14	Lotz MK	Genetic		Exercise	Protective	6
29444976	FOXO1	Removal	Surgical - DMM	Detrimental	Protective	Cartilage	Mouse	2018-02-14	Lotz MK	Genetic		Surgical	Protective	6
29444976	FOXO1	Removal	Spontaneous	Detrimental	Protective	Cartilage	Mouse	2018-02-14	Lotz MK	Genetic		Ageing	Protective	6
31980519	FOXO1	Removal	Spontaneous	Detrimental	Protective	Cartilage	Mouse	2020-01-24	Lotz MK	Genetic		Ageing	Protective	6
31980519	FOXO1	Removal	Spontaneous	Detrimental	Protective	Cartilage Inducible	Mouse	2020-01-24	Lotz MK	Genetic		Ageing	Protective	6
31980519	FOXO1	Removal	Treadmill	Detrimental	Protective	Cartilage Inducible	Mouse	2020-01-24	Lotz MK	Genetic		Exercise	Protective	6
29444976	FOXO3	Removal	Treadmill	Detrimental	Protective	Cartilage	Mouse	2018-02-14	Lotz MK	Genetic		Exercise	Protective	6
29444976	FOXO3	Removal	Surgical - DMM	Detrimental	Protective	Cartilage	Mouse	2018-02-14	Lotz MK	Genetic		Surgical	Protective	6
29444976	FOXO3	Removal	Spontaneous	Detrimental	Protective	Cartilage	Mouse	2018-02-14	Lotz MK	Genetic		Ageing	Protective	6
31980519	FOXO3	Removal	Spontaneous	Detrimental	Protective	Cartilage	Mouse	2020-01-24	Lotz MK	Genetic		Ageing	Protective	6
31980519	FOXO3	Removal	Spontaneous	Detrimental	Protective	Cartilage Inducible	Mouse	2020-01-24	Lotz MK	Genetic		Ageing	Protective	6
31980519	FOXO3	Removal	Treadmill	Detrimental	Protective	Cartilage Inducible	Mouse	2020-01-24	Lotz MK	Genetic		Exercise	Protective	6
29444976	FOXO4	Removal	Treadmill	Detrimental	Protective	Cartilage	Mouse	2018-02-14	Lotz MK	Genetic		Exercise	Protective	6
29444976	FOXO4	Removal	Surgical - DMM	Detrimental	Protective	Cartilage	Mouse	2018-02-14	Lotz MK	Genetic		Surgical	Protective	6
29444976	FOXO4	Removal	Spontaneous	Detrimental	Protective	Cartilage	Mouse	2018-02-14	Lotz MK	Genetic		Ageing	Protective	6
31980519	FOXO4	Removal	Spontaneous	Detrimental	Protective	Cartilage	Mouse	2020-01-24	Lotz MK	Genetic		Ageing	Protective	6
31980519	FOXO4	Removal	Spontaneous	Detrimental	Protective	Cartilage Inducible	Mouse	2020-01-24	Lotz MK	Genetic		Ageing	Protective	6
31980519	FOXO4	Removal	Treadmill	Detrimental	Protective	Cartilage Inducible	Mouse	2020-01-24	Lotz MK	Genetic		Exercise	Protective	6
30104377	FOXP2	Removal	Spontaneous	Detrimental	Protective	Bone	Mouse	2018-08-13	Guo X	Genetic		Ageing	Protective	2
30104377	FOXP2	Removal	Spontaneous	Detrimental	Protective	Cartilage	Mouse	2018-08-13	Guo X	Genetic		Ageing	Protective	2
25450854	FRZB	Removal	Surgical - DMM	Detrimental	Protective	Global	Mouse	2014-10-30	Lories RJ	Genetic		Surgical	Protective	1
29555825	FYN	Removal	Spontaneous	Protective	Detrimental	Global	Mouse	2018-03-19	Bai X	Genetic		Ageing	Detrimental	5
29555825	FYN	Removal	Surgical - DMM	Protective	Detrimental	Global	Mouse	2018-03-19	Bai X	Genetic		Surgical	Detrimental	5
31534047	FYN	Removal	Surgical - DMM	Protective	Detrimental	Global	Mouse	2019-09-19	Robinson WH	Genetic		Surgical	Detrimental	5
29555825	FYN	Inhibition	Surgical - DMM	Protective	Detrimental	systemic	Mouse	2018-03-19	Bai X	Exogenous	PP1	Surgical	Detrimental	5
29555825	FYN	Inhibition	Surgical - DMM	Protective	Detrimental	systemic	Mouse	2018-03-19	Bai X	Exogenous	AZD0530	Surgical	Detrimental	5
31020644	GABARAP	exogenous	Surgical - ACLT	Protective	Protective	Articular cavity	Rat	2019-04-24	Zhao J	Exogenous	Protein	Surgical	Protective	1
32067417	GDF11	Exogenous	Spontaneous	Protective	Protective	systemic	Mouse	2020-05-21	Wei L	Exogenous	Protein	Ageing	Protective	1
20805298	GDF5	Haploinsufficiency	Surgical - DMM	No effect	No effect	Global	Mouse	2010-08-30	Lories RJ	Genetic		Surgical	Ambiguous	5
20805298	GDF5	Haploinsufficiency	Collagenase	Detrimental	Protective	Global	Mouse	2010-08-30	Lories RJ	Genetic		Protease	Ambiguous	5
20805298	GDF5	Haploinsufficiency	Treadmill	Detrimental	Protective	Global	Mouse	2010-08-30	Lories RJ	Genetic		Exercise	Ambiguous	5
17656374	GDF5	Inhibition	Spontaneous	Detrimental	Protective	Global	Mouse	2007-07-26	Ikegawa S	Genetic		Ageing	Ambiguous	5
27851984	GDF5	exogenous	Surgical - DMM	Protective	Protective	Articular cavity	Rat	2016-11-13	Story B	Exogenous	Protein	Surgical	Ambiguous	5
29257344	GGCX	Overexpression	Surgical - ACLT	Protective	Protective	Articular cavity	Rabbit	2017-12-18	Yin M	Exogenous	Viral	Surgical	Protective	1
15219569	GH1	Overexpression	Spontaneous	Detrimental	Detrimental	Global	Mouse	2004-07-01	Delgado-Baeza E	Genetic		Ageing	Ambiguous	3
26275694	GH1	Activation	Collagenase	Protective	Protective	Articular cavity	Rabbit	2015-01-01	Park GY	Exogenous	AOD9604	Protease	Ambiguous	3
30871292	GH1	exogenous	Collagenase	Protective	Protective	Articular cavity	Mouse	2019-03-01	Marsetio AF	Exogenous	Protein	Protease	Ambiguous	3
29070587	GHRL	exogenous	Surgical - DMM	Protective	Protective	Articular cavity	Mouse	2018-01-03	Zhao Y	Exogenous	Protein	Surgical	Protective	1
27682878	GJA1	Deficiency	Spontaneous	Detrimental	Protective	Cartilage	Mouse	2016-11-08	Mayan MD	Genetic		Ageing	Protective	1
19915594	GLI2	Overexpression	Spontaneous	Detrimental	Detrimental	Cartilage	Mouse	2009-11-15	Alman BA	Genetic		Ageing	Detrimental	1
30926814	GREM1	Removal	Surgical - DMM + MM	Protective	Detrimental	Cartilage Inducible	Mouse	2019-03-29	Saito T	Genetic		Surgical	Ambiguous	4
30926814	GREM1	Inhibition	Surgical - DMM + MM	Protective	Detrimental	Articular cavity	Mouse	2019-03-29	Saito T	Exogenous	Antibody	Surgical	Ambiguous	4
30926814	GREM1	recombinant	Surgical - DMM + MM	Detrimental	Detrimental	Articular cavity	Mouse	2019-03-29	Saito T	Exogenous	Exogenous	Surgical	Ambiguous	4
32186934	GREM1	Knockdown	Surgical - DMM + ACLT + MM	Detrimental	Protective	Articular cavity	Mouse	2020-03-18	Qian J	Exogenous	siRNA	Surgical	Ambiguous	4
32544091	GRIA1	Inhibition	Surgical - ACLT	Protective	Detrimental	Articular cavity	Mouse	2020-07-09	Mason DJ	Exogenous	NBQX	Surgical	Detrimental	1
32544091	GRIA2	Inhibition	Surgical - ACLT	Protective	Detrimental	Articular cavity	Mouse	2020-07-09	Mason DJ	Exogenous	NBQX	Surgical	Detrimental	1
32544091	GRIA3	Inhibition	Surgical - ACLT	Protective	Detrimental	Articular cavity	Mouse	2020-07-09	Mason DJ	Exogenous	NBQX	Surgical	Detrimental	1
32544091	GRIA4	Inhibition	Surgical - ACLT	Protective	Detrimental	Articular cavity	Mouse	2020-07-09	Mason DJ	Exogenous	NBQX	Surgical	Detrimental	1
31696655	GRK5	Removal	Surgical - DMM	Protective	Detrimental	Global	Mouse	2019-11-06	Nakashima Y	Genetic		Surgical	Detrimental	2
31696655	GRK5	Inhibition	Surgical - DMM	Protective	Detrimental	Articular cavity	Mouse	2019-11-06	Nakashima Y	Exogenous	Amlexanox	Surgical	Detrimental	2
25169730	GRN	Removal	Spontaneous	Detrimental	Protective	Global	Mouse	2014-08-28	Liu CJ	Genetic		Ageing	Protective	3
25169730	GRN	Removal	Surgical - DMM	Detrimental	Protective	Global	Mouse	2014-08-28	Liu CJ	Genetic		Surgical	Protective	3
25169730	GRN	Overexpression	Surgical - ACLT	Protective	Protective	Articular cavity	Mouse	2014-08-28	Liu CJ	Exogenous	Exogenous	Surgical	Protective	3
21911068	GSK3B	Inhibition	Spontaneous	Detrimental	Protective	Articular cavity	Mouse	2011-08-27	Karperien M	Exogenous	GIN	Ageing	Protective	2
24757033	GSK3B	Inhibition	Surgical - DMM	Detrimental	Protective	Articular cavity	Mouse	2014-08-01	Rowan AD	Exogenous	GSK3B-i	Surgical	Protective	2
28646530	HAS1	Removal	Surgical - Cartilage Injury	Detrimental	Protective	Global	Mouse	2017-07-21	Plaas A	Genetic		Surgical	Protective	2
26521733	HAS1	Removal	Surgical - Cartilage Injury	Detrimental	Protective	Global	Mouse	2015-11-01	Plaas A	Genetic		Surgical	Protective	2
31310910	HDAC4	Overexpression	Surgical - ACLT	Protective	Protective	Articular cavity	Rat	2019-07-13	Wei XC	Exogenous	Viral	Surgical	Protective	1
25733872	HES1	Removal	Spontaneous	Protective	Detrimental	Cartilage Inducible	Mouse	2015-03-02	Saito T	Genetic		Ageing	Detrimental	1
26403062	HFE	Removal	Surgical - DMM + MM	Detrimental	Protective	Global	Mouse	2015-09-25	Cancela ML	Genetic		Surgical	Ambiguous	2
31132316	HFE	Removal	Spontaneous	No effect	No effect	Global	Mouse	2019-05-27	Cancela ML	Genetic		Ageing	Ambiguous	2
32214220	HIF1A	Removal	Surgical – MCL + MM	Detrimental	Protective	Cartilage Inducible	Mouse	2020-03-25	Saito T	Genetic		Surgical	Protective	2
32587244	HIF1A	Activation	Surgical - DMM	Protective	Protective	Articular cavity	Mouse	2020-06-25	Xiao J	Exogenous	DMOG	Surgical	Protective	2
31982563	HMGB1	Inhibition	Surgical - DMM	Protective	Detrimental	Articular cavity	Mouse	2020-01-23	Erlandsson Harris H	Exogenous	Antibody	Surgical	Detrimental	1
19139395	HMGB2	Removal	Spontaneous	Detrimental	Protective	Global	Mouse	2009-01-12	Lotz M	Genetic		Ageing	Protective	1
23151456	HMOX1	Overexpression	STR/ort	No effect	No effect	Articular cavity	Mouse	2012-11-11	Armentano D	Exogenous	Viral	Surgical	No effect	1
32315726	HOTAIR	Knockdown	Surgical - DMM	Protective	Detrimental	systemic	Mouse	2020-04-18	Ding L	Exogenous	siRNA	Surgical	Detrimental	1
31176016	HSD11B1	Overexpression	Surgical - DMM	Protective	Protective	Cartilage	Mouse	2019-06-05	Zhou H	Genetic		Surgical	Protective	1
23666904	HSP90AB1	Inhibition	Exercise	Protective	Detrimental	systemic	Mouse	2013-08-01	Weinans H	Exogenous	BIIB021	Exercise	Detrimental	1
30622281	HSPA1A	Overexpression	Surgical - DMM	Protective	Protective	Articular cavity	Mouse	2019-01-08	Chun JS	Exogenous	Viral	Surgical	Protective	1
16394269	HSPA2	Overexpression	MIA	Protective	Protective	Articular cavity	Rat	2006-01-01	Gillet P	Exogenous	Viral	MIA	Protective	1
27118120	HSPD1	Overexpression	Collagenase	Protective	Protective	Global	Mouse	2016-04-27	Wang FS	Genetic		Protease	Protective	1
26636652	HSPG2	Removal	Surgical - DMM	Protective	Detrimental	Global	Mouse	2016-04-01	Melrose J	Genetic		Surgical	Detrimental	2
23339896	HSPG2	Removal	Surgical - DMM + MM	Protective	Detrimental	Cartilage	Mouse	2013-01-20	Arikawa-Hirasawa E	Genetic		Surgical	Detrimental	2
31051168	HTRA1	Removal	Col11a1 haploinsufficient	Protective	Detrimental	Global	Mouse	2019-04-30	Xu L	Genetic		Genetic	Detrimental	3
31051168	HTRA1	Removal	Surgical - DMM	Protective	Detrimental	Global	Mouse	2019-04-30	Xu L	Genetic		Surgical	Detrimental	3
31051168	HTRA1	Removal	Surgical - PDE	Protective	Detrimental	Global	Mouse	2019-04-30	Xu L	Genetic		Surgical	Detrimental	3
18344557	HYAL1	Haploinsufficiency	Spontaneous	Detrimental	Protective	Global	Mouse	2008-03-15	Triggs-Raine BL	Genetic		Ageing	Protective	1
28765635	HYAL2	Removal	Surgical - DMM	Detrimental	Protective	Cartilage	Mouse	2017-08-01	Ishiguro N	Genetic		Surgical	Protective	1
22173325	IFT88	Removal	Spontaneous	Detrimental	Protective	Cartilage	Mouse	2011-11-27	Serra R	Genetic		Ageing	Protective	1
31638855	IGF1	Removal	Surgical - DMM	Protective	Detrimental	Liver	Mouse	2019-10-22	Svensson J	Genetic		Surgical	Ambiguous	3
31638855	IGF1	Removal	Spontaneous	No effect	No effect	Liver	Mouse	2019-10-22	Svensson J	Genetic		Ageing	Ambiguous	3
20733349	IGF1	Overexpression	Surgical - ACLT	Protective	Protective	Articular cavity	Rabbit	2010-10-31	Chen L	Exogenous	Viral	Surgical	Ambiguous	3
26015264	IGF2	Overexpression	Surgical - DMM	Protective	Protective	Articular cavity	Mouse	2015-12-01	Zeng L	Exogenous	Viral	Surgical	Protective	1
24428864	IHH	Removal	Spontaneous	Protective	Detrimental	Cartilage Inducible	Mouse	2014-01-15	Wei L	Genetic		Ageing	Detrimental	2
29440889	IHH	Inhibition	Surgical - ACLT	Protective	Detrimental	Articular cavity	Rat	2018-01-31	Wei L	Exogenous	siRNA	Surgical	Detrimental	2
26256766	IKBKG	Inhibition	Surgical - UAC	Protective	Detrimental	systemic	Mouse	2015-08-06	Wang MQ	Exogenous	NBD peptide	Surgical	Detrimental	1
32647171	IKK2	Overexpression	Spontaneous	Detrimental	Detrimental	Cartilage Inducible	Mouse	2020-07-09	Abu-Amer Y	Genetic		Ageing	Detrimental	1
32431699	IL17A	Removal	MIA	Protective	Detrimental	Global	Mouse	2020-05-05	Cho ML	Genetic		MIA	Detrimental	2
32431699	IL17A	Removal	Surgical – DMM	Protective	Detrimental	Global	Mouse	2020-05-05	Cho ML	Genetic		Surgical	Detrimental	2
21310253	IL17RA	Inhibition	Surgical - MM	Protective	Detrimental	systemic	Mouse	2011-02-22	Liu SQ	Exogenous	DNA aptamers	Surgical	Detrimental	1
15331419	IL18	Overexpression	Spontaneous	Detrimental	Detrimental	Articular cavity	Mouse	2020-01-29	van den Berg WB	Exogenous	Viral	Ageing	Detrimental	1
27654963	IL1A	Removal	Collagenase	No effect	No effect	Global	Mouse	2016-09-18	van Lent PL	Genetic		Protease	No effect	1
27654963	IL1B	Removal	Collagenase	No effect	No effect	Global	Mouse	2016-09-18	van Lent PL	Genetic		Protease	Ambiguous	4
14673996	IL1B	Removal	Surgical - DMM + MM	Detrimental	Protective	Global	Mouse	2003-12-01	Mason RM	Genetic		Surgical	Ambiguous	4
26108147	IL1B	Knockdown	Surgical - DMM + ACL + MM	Protective	Detrimental	Articular cavity	Rabbit	2015-07-20	Liao Q	Exogenous	siRNA	Surgical	Ambiguous	4
30842121	IL1B	Removal	Surgical - DMM	Protective	Detrimental	Articular cavity	Mouse	2019-03-06	Chen D	Exogenous	CRISPR	Surgical	Ambiguous	4
32431699	IL1RN	Removal	MIA	Detrimental	Protective	Global	Mouse	2020-05-05	Cho ML	Genetic		MIA	Protective	4
20733349	IL1RN	Overexpression	Surgical - ACLT	Protective	Protective	Articular cavity	Rabbit	2010-10-31	Chen L	Exogenous	Viral	Surgical	Protective	4
25219670	IL1RN	exogenous	Surgical - ACLT	Protective	Protective	Articular cavity	Rat	2014-09-16	Jay GD	Exogenous	Protein	Surgical	Protective	4
27539076	IL1RN	exogenous	Surgical - ACLT	Protective	Protective	Articular cavity	Rat	2016-08-19	D'Souza G	Exogenous	Protein	Surgical	Protective	4
28426699	IL20	Inhibition	Surgical - DMM	Protective	Detrimental	Articular cavity	Mouse	2017-04-20	Chang MS	Exogenous	Antibody	Surgical	Detrimental	1
32636527	IL22	Inhibition	Surgical - DMM	Protective	Detrimental	Articular cavity	Mouse	2020-07-07	Sacitharan PK	Exogenous	antibody	Surgical	Detrimental	1
32636527	IL22RA1	Removal	Surgical – DMM	Protective	Detrimental	Cartilage Inducible	Mouse	2020-07-07	Sacitharan PK	Genetic		Surgical	Detrimental	2
32636527	IL22RA1	Inhibition	Surgical - DMM	Protective	Detrimental	Articular cavity	Mouse	2020-07-07	Sacitharan PK	Exogenous	antibody	Surgical	Detrimental	2
27183574	IL3	exogenous	Surgical - ACLT	Protective	Protective	Articular cavity	Mouse	2016-05-13	Wani MR	Exogenous	Protein	Surgical	Protective	1
31068441	IL36A	exogenous	Surgical - DMM	Detrimental	Detrimental	Articular cavity	Mouse	2019-05-08	Spagnoli A	Exogenous	Protein	Surgical	Detrimental	1
31068441	IL36RN	exogenous	Surgical - DMM	Protective	Protective	Articular cavity	Mouse	2019-05-08	Spagnoli A	Exogenous	Protein	Surgical	Protective	1
18182309	IL4	exogenous	Surgical - DMM + ACL + MM	Protective	Protective	Articular cavity	Rat	2008-01-07	Ozaki T	Exogenous	Protein	Surgical	Protective	2
30891766	IL4	recombinant	Surgical - DMM	Protective	Protective	Articular cavity	Mouse	2019-03-19	Sun HB	Exogenous	Exogenous	Surgical	Protective	2
21590680	IL6	Removal	Surgical - DMM	Protective	Detrimental	Global	Mouse	2011-09-01	Chun JS	Genetic		Surgical	Ambiguous	4
15639639	IL6	Removal	Spontaneous	Detrimental	Protective	Global	Mouse	2005-01-01	van den Berg WB	Genetic		Ageing	Ambiguous	4
15639639	IL6	Removal	Collagenase	No effect	No effect	Global	Mouse	2005-01-01	van den Berg WB	Genetic		Protease	Ambiguous	4
21590680	IL6	exogenous	Spontaneous	Detrimental	Detrimental	Articular cavity	Mouse	2011-09-01	Chun JS	Exogenous	Protein	Ageing	Ambiguous	4
27789465	IL6R	Inhibition	Surgical - DMM	Protective	Detrimental	systemic	Mouse	2016-10-27	Richette P	Exogenous	Antibody	Surgical	Detrimental	1
29436471	IL6ST	Activation	Surgical - MM	Protective	Protective	Articular cavity	Mouse	2018-02-07	Evseenko D	Exogenous	RCGD 423	Surgical	Protective	1
29622035	IRF4	Removal	Collagenase	Protective	Detrimental	Global	Mouse	2018-04-05	Cook AD	Genetic		Protease	Detrimental	1
14558093	ITGA1	Removal	Spontaneous	Detrimental	Protective	Global	Mouse	2003-10-01	Lotz M	Genetic		Ageing	Protective	3
27211864	ITGA1	Removal	Surgical - DMM	Detrimental	Protective	Global	Mouse	2016-05-20	Clark AL	Genetic		Surgical	Protective	3
24018042	ITGA1	Overexpression	Surgical - DMM	Protective	Protective	Articular cavity	Mouse	2013-09-07	Jin EJ	Exogenous	Viral	Surgical	Protective	3
27280771	ITGA5	Removal	Surgical - DMM + MCL	Protective	Detrimental	Cartilage	Mouse	2016-06-09	Enomoto-Iwamoto M	Genetic		Surgical	Detrimental	1
31534047	ITGB3	Removal	Surgical - DMM	Protective	Detrimental	Global	Mouse	2019-09-19	Robinson WH	Genetic		Surgical	Detrimental	2
31534047	ITGB3	Inhibition	Surgical - DMM	Protective	Detrimental	systemic	Mouse	2019-09-19	Robinson WH	Exogenous	P11	Surgical	Detrimental	2
30305454	ITGBL1	Overexpression	Surgical - DMM	Protective	Protective	Articular cavity	Mouse	2018-10-10	Park TJ	Exogenous	Viral	Surgical	Protective	2
30305454	ITGBL1	Knockdown	Spontaneous	Detrimental	Protective	Articular cavity	Mouse	2018-10-10	Park TJ	Exogenous	siRNA	Ageing	Protective	2
27147707	JUN	Knockdown	Surgical - DMM	Protective	Detrimental	Articular cavity	Mouse	2016-05-04	Chun JS	Exogenous	siRNA	Surgical	Detrimental	2
29476740	JUN	Inhibition	Surgical - DMM	Protective	Detrimental	systemic	Mouse	2018-02-21	Kimura T	Exogenous	T-5224	Surgical	Detrimental	2
31735552	KAT2B	Inhibition	Surgical - DMM	Protective	Detrimental	systemic	Mouse	2019-11-14	Pan X	Exogenous	Salidroside	Surgical	Detrimental	1
28314754	KDM6B	Removal	Surgical - DMM	Detrimental	Protective	Cartilage Inducible	Mouse	2017-03-17	Ouyang H	Genetic		Surgical	Ambiguous	4
28314754	KDM6B	Knockdown	Surgical - DMM	Detrimental	Protective	Articular cavity	Mouse	2017-03-17	Ouyang H	Exogenous	Viral	Surgical	Ambiguous	4
29622035	KDM6B	Inhibition	Collagenase	Protective	Detrimental	Articular cavity	Mouse	2018-04-05	Cook AD	Exogenous	Antibody	Protease	Ambiguous	4
32394143	KDM6B	Inhibition	Surgical - DMM	Protective	Detrimental	Articular cavity	Mouse	2020-05-11	Jiangan T	Exogenous	GSK-J4	Surgical	Ambiguous	4
29026147	KDR	Inhibition	Surgical - DMM	Protective	Detrimental	Articular cavity	Mouse	2017-10-12	Olsen BR	Exogenous	vandetanib	Surgical	Detrimental	1
29920476	KL	exogenous	Collagenase	Protective	Protective	Articular cavity	Mouse	2018-06-19	Brondello JM	Exogenous	Protein	Protease	Protective	1
31827706	KLF2	Overexpression	MIA	Protective	Protective	Articular cavity	Rat	2019-11-19	Li X	Exogenous	Viral	MIA	Protective	1
23151457	LCAT	Removal	High Fat Diet	Detrimental	Protective	Global	Mouse	2012-11-11	Papachristou DJ	Genetic		High Fat Diet	Protective	1
27477830	LCN2	Removal	Surgical - DMM	No effect	No effect	Global	Mouse	2016-07-29	Chun JS	Genetic		Surgical	No effect	2
27477830	LCN2	Overexpression	Surgical - DMM	No effect	No effect	Articular cavity	Mouse	2016-07-29	Chun JS	Exogenous	Viral	Surgical	No effect	2
32647171	LDHA	Removal	Surgical – MM	Protective	Detrimental	Cartilage	Mouse	2020-07-09	Abu-Amer Y	Genetic		Surgical	Detrimental	1
29074298	LDLR	Removal	High Fat Diet	Detrimental	Protective	Global	Mouse	2017-10-24	Stoop R	Genetic		High Fat Diet	Protective	2
24286458	LDLR	Removal	Collagenase	Detrimental	Protective	Global	Mouse	2013-11-04	van Lent PL	Genetic		Protease	Protective	2
27390029	LEPR	Mutation	Surgical - DMM + MCL	Detrimental	Protective	Global	Mouse	2016-07-05	Caramés B	Genetic		Surgical	Ambiguous	2
28823646	LEPR	Knockdown	Surgical - ACLT	Protective	Detrimental	Articular cavity	Rat	2017-08-18	Li J	Exogenous	shRNA	Surgical	Ambiguous	2
17545192	LGALS3	Removal	Spontaneous	Detrimental	Protective	Global	Mouse	2007-06-01	Reboul P	Genetic		Ageing	Ambiguous	5
17545192	LGALS3	Removal	MIA	Detrimental	Protective	Global	Mouse	2007-06-01	Reboul P	Genetic		MIA	Ambiguous	5
32098291	LGALS3	Removal	Surgical - MM	Detrimental	Protective	Global	Mouse	2020-02-22	Ea HK	Genetic		Surgical	Ambiguous	5
32098291	LGALS3	Removal	Spontaneous	Detrimental	Protective	Global	Mouse	2020-02-22	Ea HK	Genetic		Ageing	Ambiguous	5
17326835	LGALS3	exogenous	Spontaneous	Detrimental	Detrimental	Articular cavity	Mouse	2007-01-01	Reboul P	Exogenous	Protein	Ageing	Ambiguous	5
31569601	LOXL2	Overexpression	MIA	Protective	Protective	Global	Mouse	2019-09-27	Bais MV	Genetic		MIA	Protective	1
24479426	LRP5	Removal	Surgical - DMM	Protective	Detrimental	Cartilage	Mouse	2014-01-31	Ryu JH	Genetic		Surgical	Detrimental	2
24479426	LRP5	Removal	Spontaneous	Protective	Detrimental	Global	Mouse	2014-01-31	Ryu JH	Genetic		Ageing	Detrimental	2
23756208	LRP6	Deficiency	Surgical - DMM + ACL+MM	Detrimental	Protective	Global	Mouse	2013-06-10	Williams BO	Genetic		Surgical	Protective	1
11790802	LTBP3	Removal	Spontaneous	Detrimental	Protective	Global	Mouse	2002-01-14	Rifkin DB	Genetic		Ageing	Protective	1
12089156	LUM	Removal	Spontaneous	Detrimental	Protective	Global	Mouse	2002-06-27	Chakravarti S	Genetic		Ageing	Protective	1
12794826	MAP2K1	Inhibition	Surgical - ACLT	Protective	Detrimental	systemic	Rabbit	2003-06-01	Martel-Pelletier J	Exogenous	PD 198306	Surgical	Detrimental	1
12794826	MAP2K2	Inhibition	Surgical - ACLT	Protective	Detrimental	systemic	Rabbit	2003-06-01	Martel-Pelletier J	Exogenous	PD 198306	Surgical	Detrimental	1
26405834	MAP3K5	Removal	Spontaneous	Protective	Detrimental	Global	Mouse	2015-09-29	Freeman TA	Genetic		Ageing	Detrimental	2
26405834	MAP3K5	Removal	Surgical - DMM	Protective	Detrimental	Global	Mouse	2015-09-29	Freeman TA	Genetic		Surgical	Detrimental	2
18975318	MAPK14	Inhibition	Spontaneous	Detrimental	Protective	Global	Mouse	2008-11-01	Chen Q	Genetic		Ageing	Ambiguous	2
29524442	MAPK14	Inhibition	Surgical - DMM	Protective	Detrimental	Articular cavity	Mouse	2018-03-07	All?mann E	Exogenous	PH-797804	Surgical	Ambiguous	2
32418287	MAPK8	Removal	Spontaneous	Detrimental	Protective	Global	Mouse	2020-05-17	Carlson CS	Genetic		Ageing	Ambiguous	2
32418287	MAPK8	Removal	Surgical – DMM	No effect	No effect	Global	Mouse	2020-05-17	Carlson CS	Genetic		Surgical	Ambiguous	2
26663140	MAPK9	Removal	Surgical - DMM	Protective	Detrimental	Global	Mouse	2016-05-01	Saklatvala J	Genetic		Surgical	Ambiguous	3
32418287	MAPK9	Removal	Spontaneous	Detrimental	Protective	Global	Mouse	2020-05-17	Carlson CS	Genetic		Ageing	Ambiguous	3
32418287	MAPK9	Removal	Surgical – DMM	No effect	No effect	Global	Mouse	2020-05-17	Carlson CS	Genetic		Surgical	Ambiguous	3
27270603	MATN1	Removal	Surgical - DMM	Detrimental	Protective	Global	Mouse	2016-06-07	Chen Q	Genetic		Surgical	Protective	2
31963938	MATN1	Removal	Spontaneous	Detrimental	Protective	Global	Mouse	2020-01-19	Aszodi A	Genetic		Ageing	Protective	2
31963938	MATN2	Removal	Spontaneous	Detrimental	Protective	Global	Mouse	2020-01-19	Aszodi A	Genetic		Ageing	Protective	1
16877353	MATN3	Removal	Spontaneous	Detrimental	Protective	Global	Mouse	2006-08-01	Chen Q	Genetic		Ageing	Protective	2
31963938	MATN3	Removal	Spontaneous	Detrimental	Protective	Global	Mouse	2020-01-19	Aszodi A	Genetic		Ageing	Protective	2
31963938	MATN4	Removal	Spontaneous	Detrimental	Protective	Global	Mouse	2020-01-19	Aszodi A	Genetic		Ageing	Protective	1
25191747	MC1R	Removal	Surgical - DMM	Detrimental	Protective	Global	Mouse	2014-09-05	Grässel S	Genetic		Surgical	Protective	1
26797130	MCAT	Overexpression	Spontaneous	Protective	Protective	Global	Mouse	2016-01-21	Loeser RF	Genetic		Ageing	Protective	1
31084709	MCL1	Removal	Surgical - DMM	Protective	Detrimental	Mast cells	Mouse	2019-05-14	Robinson WH	Genetic		Surgical	Detrimental	1
25366485	MDK	exogenous	Surgical - DMM	Protective	Protective	systemic	Mouse	2014-01-01	Yu Y	Exogenous	Protein	Surgical	Protective	1
26103880	MECP2	Overexpression	Surgical - DMM	Detrimental	Detrimental	Articular cavity	Mouse	2015-06-24	Jin EJ	Exogenous	Viral	Surgical	Detrimental	2
26103880	MECP2	Knockdown	Surgical - DMM	Protective	Detrimental	Articular cavity	Mouse	2015-06-24	Jin EJ	Exogenous	siRNA	Surgical	Detrimental	2
32416221	MFN2	Overexpression	Surgical - DMM	Detrimental	Detrimental	Articular cavity	Rat	2020-05-19	Wu L	Exogenous	Viral	Surgical	Detrimental	2
32416221	MFN2	Knockdown	Surgical - DMM	Protective	Detrimental	Articular cavity	Rat	2020-05-19	Wu L	Exogenous	Viral	Surgical	Detrimental	2
21368873	MIA	Removal	Surgical - DMM + MM	Protective	Detrimental	Global	Mouse	2010-11-11	Bosserhoff AK	Genetic		Surgical	Detrimental	1
27564840	MIF	Removal	Spontaneous	Protective	Detrimental	Global	Mouse	2017-02-01	Loeser RF	Genetic		Ageing	Ambiguous	2
27564840	MIF	Removal	Surgical - DMM	No effect	No effect	Global	Mouse	2017-02-01	Loeser RF	Genetic		Surgical	Ambiguous	2
31647983	MINK1	Removal	Spontaneous	Protective	Detrimental	Global	Mouse	2019-10-21	Ouyang H	Genetic		Ageing	Ambiguous	2
31647983	MINK1	Removal	Surgical - DMM	Detrimental	Protective	Global	Mouse	2019-10-21	Ouyang H	Genetic		Surgical	Ambiguous	2
32626917	mir-1	Overexpression	Surgical – ACLT	Protective	Protective	Cartilage	Mouse	2020-05-12	Li P	Genetic		Surgical	Protective	1
24018042	mir-101	Overexpression	Surgical - DMM	Protective	Protective	Articular cavity	Mouse	2013-09-07	Jin EJ	Exogenous	Viral	Surgical	Ambiguous	3
25921548	mir-101	Overexpression	MIA	Detrimental	Detrimental	Articular cavity	Rat	2015-04-29	Ao Y	Exogenous	Viral	MIA	Ambiguous	3
25921548	mir-101	Knockdown	MIA	Protective	Detrimental	Articular cavity	Rat	2015-04-29	Ao Y	Exogenous	siRNA	MIA	Ambiguous	3
29858052	mir-106a-5p	Overexpression	Surgical - ACLT	Protective	Protective	Articular cavity	Mouse	2018-02-08	Wang Y	Exogenous	agomir	Surgical	Protective	1
30731321	mir-10a-5p	Inhibition	Surgical - ACLT	Protective	Detrimental	Articular cavity	Mouse	2018-12-25	Zhang J	Exogenous	Antagomir	Surgical	Detrimental	2
30731321	mir-10a-5p	Overexpression	Surgical - ACLT	Detrimental	Detrimental	Articular cavity	Mouse	2018-12-25	Zhang J	Exogenous	agomir	Surgical	Detrimental	2
30206206	mir-128a	Overexpression	Spontaneous	Detrimental	Detrimental	Articular cavity	Rat	2018-09-11	Wang FS	Exogenous	Viral	Ageing	Detrimental	2
30206206	mir-128a	Inhibition	Surgical - ACLT	Protective	Detrimental	Articular cavity	Rat	2018-09-11	Wang FS	Exogenous	Antagomir	Surgical	Detrimental	2
31160553	mir-140	Removal	Spontaneous	Detrimental	Protective	Global	Mouse	2019-06-03	Asahara H	Genetic		Ageing	Protective	5
20466812	mir-140	Removal	Spontaneous	Detrimental	Protective	Cartilage	Mouse	2010-05-13	Asahara H	Genetic		Ageing	Protective	5
20466812	mir-140	Removal	Surgical - DMM	Detrimental	Protective	Cartilage	Mouse	2010-05-13	Asahara H	Genetic		Surgical	Protective	5
28647469	mir-140	Overexpression	Surgical - ACLT+ MM	Protective	Protective	Articular cavity	Rat	2017-06-21	Shen B	Exogenous	agomir	Surgical	Protective	5
31790972	mir-140	Overexpression	Surgical - DMM + ACLT	Protective	Protective	Articular cavity	Rat	2019-11-09	Shen B	Exogenous	agomir	Surgical	Protective	5
27447821	mir-142-3p	Overexpression	Surgical - DMM	Protective	Protective	Articular cavity	Mouse	2016-10-01	Yu H	Exogenous	Viral	Surgical	Protective	1
29575548	mir-146a	Overexpression	Surgical - DMM	Protective	Protective	Cartilage	Mouse	2018-03-24	Chen Q	Genetic		Surgical	Ambiguous	6
29575548	mir-146a	Removal	Surgical - DMM	Detrimental	Protective	Global	Mouse	2018-03-24	Chen Q	Genetic		Surgical	Ambiguous	6
29575548	mir-146a	Overexpression	Spontaneous	Protective	Protective	Cartilage	Mouse	2018-03-24	Chen Q	Genetic		Ageing	Ambiguous	6
29575548	mir-146a	Removal	Spontaneous	Detrimental	Protective	Global	Mouse	2018-03-24	Chen Q	Genetic		Ageing	Ambiguous	6
28383548	mir-146a	Removal	Spontaneous	Protective	Detrimental	Global	Mouse	2017-04-06	Zhang X	Genetic		Ageing	Ambiguous	6
28383548	mir-146a	Removal	Surgical - DMM	Protective	Detrimental	Global	Mouse	2017-04-06	Zhang X	Genetic		Surgical	Ambiguous	6
31422941	mir-146b	Inhibition	Surgical - DMM	Protective	Detrimental	Articular cavity	Mouse	2019-08-17	Cai D	Exogenous	Antagomir	Surgical	Detrimental	1
30287418	mir-181a-5p	Knockdown	Surgical - Cartilage Injury	Protective	Detrimental	Articular cavity	Mouse	2018-10-04	Kapoor M	Exogenous	ASO	Surgical	Detrimental	1
23313477	mir-181b	Overexpression	Surgical - DMM	Protective	Protective	Articular cavity	Mouse	2013-01-09	Jin EJ	Exogenous	Viral	Surgical	Protective	1
31253842	mir-204	Removal	Spontaneous	Detrimental	Protective	Global	Mouse	2019-06-28	Chen D	Genetic		Ageing	Ambiguous	6
31253842	mir-204	Removal	Spontaneous	Detrimental	Protective	Forelimb	Mouse	2019-06-28	Chen D	Genetic		Ageing	Ambiguous	6
30944169	mir-204	exogenous	Spontaneous	Detrimental	Detrimental	Articular cavity	Mouse	2019-04-03	Kim JH	Exogenous	Mimic	Ageing	Ambiguous	6
30944169	mir-204	exogenous	Surgical - DMM	Detrimental	Detrimental	Articular cavity	Mouse	2019-04-03	Kim JH	Exogenous	Mimic	Surgical	Ambiguous	6
30944169	mir-204	Inhibition	Surgical - DMM	Protective	Detrimental	Articular cavity	Mouse	2019-04-03	Kim JH	Exogenous	anti mir-204	Surgical	Ambiguous	6
31253842	mir-204	Overexpression	Surgical - DMM	Protective	Protective	Articular cavity	Mouse	2019-06-28	Chen D	Exogenous	Viral	Surgical	Ambiguous	6
30106092	mir-204-5p	Overexpression	Surgical - DMM + ACL + MM	Protective	Protective	Articular cavity	Rat	2018-08-07	Li X	Exogenous	agomir	Surgical	Protective	1
25196583	mir-21	Overexpression	Surgical - DMM	Detrimental	Detrimental	Articular cavity	Mouse	2014-09-05	Jin EJ	Exogenous	Viral	Surgical	Detrimental	2
25196583	mir-21	Knockdown	Surgical - DMM	Protective	Detrimental	Articular cavity	Mouse	2014-09-05	Jin EJ	Exogenous	siRNA	Surgical	Detrimental	2
30932160	mir-21-5p	Removal	Spontaneous	Protective	Detrimental	Cartilage Inducible	Mouse	2019-04-01	Zheng X	Genetic		Ageing	Detrimental	4
30932160	mir-21-5p	Removal	Surgical - DMM	Protective	Detrimental	Cartilage Inducible	Mouse	2019-04-01	Zheng X	Genetic		Surgical	Detrimental	4
32357909	mir-21-5p	Removal	Surgical – UAC	Protective	Detrimental	Global	Mouse	2020-05-01	Zhao H	Genetic		Surgical	Detrimental	4
30932160	mir-21-5p	Removal	Surgical - DMM	Protective	Detrimental	Articular cavity	Mouse	2019-04-01	Zheng X	Exogenous	Antagomir	Surgical	Detrimental	4
31253842	mir-211	Removal	Spontaneous	Detrimental	Protective	Global	Mouse	2019-06-28	Chen D	Genetic		Ageing	Protective	2
31253842	mir-211	Removal	Spontaneous	Detrimental	Protective	Forelimb	Mouse	2019-06-28	Chen D	Genetic		Ageing	Protective	2
28919376	mir-218-5p	Inhibition	Surgical - DMM	Protective	Detrimental	Articular cavity	Mouse	2017-08-19	Im HJ	Exogenous	inhibitor	Surgical	Detrimental	1
26673737	mir-222	Knockdown	Surgical - DMM	Detrimental	Protective	Articular cavity	Mouse	2014-12-09	Jin EJ	Exogenous	siRNA	Surgical	Protective	1
32186934	mir-23a	Inhibition	Surgical - DMM + ACLT + MM	Protective	Detrimental	Articular cavity	Mouse	2020-03-18	Qian J	Exogenous	Antagomir	Surgical	Detrimental	1
32186934	mir-23b	Inhibition	Surgical - DMM + ACLT + MM	Protective	Detrimental	Articular cavity	Mouse	2020-03-18	Qian J	Exogenous	Antagomir	Surgical	Detrimental	1
28620193	mir-29a	Overexpression	Collagenase	Protective	Protective	Articular cavity	Mouse	2017-06-15	Wang FS	Exogenous	Injection	Protease	Protective	1
28620193	miR-29a	Overexpression	Collagenase	Protective	Protective	Global	Mouse	2017-06-15	Wang FS	Genetic		Protease	Protective	1
32693649	mir-29b	Inhibition	Surgical - UAC	Detrimental	Protective	Articular cavity	Mouse	2020-07-21	Jiao K	Exogenous	Antagomir	Surgical	Protective	2
32693649	mir-29b	Overexpression	Surgical - UAC	Protective	Protective	Articular cavity	Mouse	2020-07-21	Jiao K	Exogenous	agomir	Surgical	Protective	2
31075235	mir-320-3p	Inhibition	Collagenase	Protective	Protective	Articular cavity	Mouse	2019-05-08	Zhang Z	Exogenous	agomir	Protease	Protective	1
26103880	mir-370	Knockdown	Surgical - DMM	Detrimental	Protective	Articular cavity	Mouse	2015-06-24	Jin EJ	Exogenous	siRNA	Surgical	Protective	2
26103880	mir-370	Overexpression	Surgical - DMM	Protective	Protective	Articular cavity	Mouse	2015-06-24	Jin EJ	Exogenous	Viral	Surgical	Protective	2
26103880	mir-373	Knockdown	Surgical - DMM	Detrimental	Protective	Articular cavity	Mouse	2015-06-24	Jin EJ	Exogenous	siRNA	Surgical	Protective	2
26103880	mir-373	Overexpression	Surgical - DMM	Protective	Protective	Articular cavity	Mouse	2015-06-24	Jin EJ	Exogenous	Viral	Surgical	Protective	2
32335541	mir-375	Inhibition	Surgical - DMM	Protective	Detrimental	Articular cavity	Mouse	2020-04-26	Mao X	Exogenous	Antagomir	Surgical	Detrimental	2
32045921	mir-375	Inhibition	Surgical - ACLT + MM	Protective	Detrimental	Articular cavity	Mouse	2020-02-11	Guo WC	Exogenous	Antagomir	Surgical	Detrimental	2
31586040	mir-455-3p	Removal	Spontaneous	Detrimental	Protective	Global	Mouse	2019-10-04	Zhang Z	Genetic		Ageing	Protective	1
30145794	mir-483-5p	Overexpression	Spontaneous	Detrimental	Detrimental	Inducible	Mouse	2018-08-26	Bai X	Genetic		Ageing	Detrimental	4
28139355	mir-483-5p	Overexpression	Surgical - DMM	Detrimental	Detrimental	Inducible	Mouse	2017-01-27	Bai X	Genetic		Surgical	Detrimental	4
28139355	mir-483-5p	Overexpression	Spontaneous	Detrimental	Detrimental	Articular cavity	Mouse	2017-01-27	Bai X	Exogenous	Viral	Ageing	Detrimental	4
30145794	mir-483-5p	Overexpression	Surgical - DMM	Detrimental	Detrimental	Articular cavity	Mouse	2018-08-26	Bai X	Exogenous	Viral	Surgical	Detrimental	4
31085006	mir-671	Overexpression	Surgical - DMM	Protective	Protective	systemic	Mouse	2019-04-28	Zhu Y	Exogenous	Mimics	Surgical	Protective	1
32584470	miR-877-5p	Overexpression	Surgical - ACLT	Protective	Protective	Articular cavity	Mouse	2020-06-25	Nie Z	Exogenous	agomir	Surgical	Protective	1
31169312	mir-9-5p	Overexpression	Surgical - tibial plateau fracture	Protective	Protective	Articular cavity	Mouse	2019-06-06	Tan Z	Exogenous	Viral	Surgical	Protective	1
32377874	miR-9-5p	Overexpression	Surgical - DMM + ACLT	Protective	Protective	Articular cavity	Rat	2020-05-06	Qi S	Exogenous	agomir	Surgical	Protective	2
32377874	miR-9-5p	Inhibition	Surgical - DMM + ACLT	Detrimental	Protective	Articular cavity	Rat	2020-05-06	Qi S	Exogenous	Antagomir	Surgical	Protective	2
23298463	MMP13	Removal	Surgical - DMM + MM	Protective	Detrimental	Cartilage Inducible	Mouse	2013-01-08	Chen D	Genetic		Surgical	Detrimental	10
19950295	MMP13	Removal	Spontaneous	Protective	Detrimental	Global	Mouse	2009-12-01	Thompson EW	Genetic		Ageing	Detrimental	10
19950295	MMP13	Removal	Surgical - DMM	Protective	Detrimental	Global	Mouse	2009-12-01	Thompson EW	Genetic		Surgical	Detrimental	10
11134178	MMP13	Overexpression	Spontaneous	Detrimental	Detrimental	Global	Mouse	2001-01-01	DeGennaro LJ	Genetic		Ageing	Detrimental	10
17623656	MMP13	Inhibition	Surgical - DMM	Protective	Detrimental	systemic	Rabbit	2007-07-10	Dyer RD	Exogenous	MMP13 inhibitor	Surgical	Detrimental	10
23298463	MMP13	Inhibition	Surgical - MMTL	Protective	Detrimental	systemic	Mouse	2013-01-08	Chen D	Exogenous	CL82198	Surgical	Detrimental	10
24848439	MMP13	Knockdown	Surgical - DMM	Protective	Detrimental	Articular cavity	Mouse	2014-05-22	Takahashi K	Exogenous	siRNA	Surgical	Detrimental	10
28120109	MMP13	Knockdown	Surgical - DMM	Protective	Detrimental	Articular cavity	Mouse	2017-01-24	Sasho T	Exogenous	siRNA	Surgical	Detrimental	10
30345823	MMP13	Knockdown	Surgical - DMM	Protective	Detrimental	Articular cavity	Mouse	2018-10-26	Sasho T	Exogenous	siRNA	Surgical	Detrimental	10
30842121	MMP13	Removal	Surgical - DMM	Protective	Detrimental	Articular cavity	Mouse	2019-03-06	Chen D	Exogenous	CRISPR	Surgical	Detrimental	10
21216815	MMP17	Removal	Surgical - DMM	No effect	No effect	Global	Mouse	2011-01-07	Newham P	Genetic		Surgical	No effect	1
17195217	MMP3	Removal	Spontaneous	Protective	Detrimental	Global	Mouse	2007-01-01	van den Berg WB	Genetic		Ageing	Ambiguous	2
14673996	MMP3	Removal	Surgical - DMM + MM	Detrimental	Protective	Global	Mouse	2003-12-01	Mason RM	Genetic		Surgical	Ambiguous	2
32183900	MPST	Removal	Surgical – MM	Detrimental	Protective	Global	Mouse	2020-03-17	Busso N	Genetic		Surgical	Protective	1
27766031	MSR1	Removal	Surgical - ACLT	Protective	Detrimental	Global	Mouse	2016-08-26	Chen Q	Genetic		Surgical	Detrimental	1
26903440	MT1A	Removal	Surgical - DMM	Detrimental	Protective	Cartilage	Mouse	2016-02-22	Chun JS	Genetic		Surgical	Ambiguous	2
26903440	MT1A	Overexpression	Surgical - DMM	No effect	No effect	Articular cavity	Mouse	2016-02-22	Chun JS	Exogenous	Viral	Surgical	Ambiguous	2
26903440	MT2A	Removal	Surgical - DMM	Detrimental	Protective	Cartilage	Mouse	2016-02-22	Chun JS	Genetic		Surgical	Ambiguous	2
26903440	MT2A	Overexpression	Surgical - DMM	Detrimental	Detrimental	Articular cavity	Mouse	2016-02-22	Chun JS	Exogenous	Viral	Surgical	Ambiguous	2
24529376	MTF1	Removal	Surgical - DMM	Protective	Detrimental	Cartilage	Mouse	2014-02-13	Chun JS	Genetic		Surgical	Detrimental	2
26241779	MTF1	Overexpression	Spontaneous	Detrimental	Detrimental	Articular cavity	Mouse	2015-08-01	Chun JS	Exogenous	Viral	Ageing	Detrimental	2
24651621	MTOR	Removal	Surgical - DMM	Protective	Detrimental	Cartilage Inducible	Mouse	2014-03-20	Kapoor M	Genetic		Surgical	Detrimental	6
31007149	MTOR	Removal	Surgical - UAC	Protective	Detrimental	Cartilage Inducible	Mouse	2019-04-21	Wang M	Genetic		Surgical	Detrimental	6
27052304	MTOR	Inhibition	Collagenase	Protective	Detrimental	Articular cavity	Rabbit	2016-04-06	Meng H	Exogenous	Torin 1	Protease	Detrimental	6
27301478	MTOR	Inhibition	Collagenase	Protective	Detrimental	Articular cavity	Rabbit	2016-06-01	Cui YP	Exogenous	Torin 1	Protease	Detrimental	6
30145794	MTOR	Inhibition	Surgical - DMM	Protective	Detrimental	systemic	Mouse	2018-08-26	Bai X	Exogenous	Rapamycin	Surgical	Detrimental	6
31407595	MTOR	Inhibition	Surgical - DMM	Protective	Detrimental	Articular cavity	Mouse	2019-08-13	Jin Q	Exogenous	Rapamycin	Surgical	Detrimental	6
24703622	MYD88	Removal	Surgical - DMM +MM	No effect	No effect	Global	Mouse	2014-04-02	Busso N	Genetic		Surgical	No effect	1
31063807	NAAA	Inhibition	MIA	Protective	Detrimental	Articular cavity	Mouse	2019-05-04	Li Y	Exogenous	N-Acylethanolamine acid amidase	MIA	Detrimental	1
24347567	NAMPT	Overexpression	Surgical - DMM	Detrimental	Detrimental	Cartilage	Mouse	2013-12-17	Chun JS	Genetic		Surgical	Detrimental	3
24347567	NAMPT	Inhibition	Spontaneous	Protective	Detrimental	Articular cavity	Mouse	2013-12-17	Chun JS	Exogenous	FK866	Ageing	Detrimental	3
24347567	NAMPT	Overexpression	Spontaneous	Detrimental	Detrimental	Articular cavity	Mouse	2013-12-17	Chun JS	Exogenous	Viral	Ageing	Detrimental	3
31742919	NCAM1	Removal	MIA	Detrimental	Protective	Global	Mouse	2019-11-19	Feng ZW	Genetic		MIA	Protective	1
30195046	NCF1	Removal	Collagenase	No effect	No effect	Global	Mouse	2018-09-05	van den Bosch MHJ	Genetic		Protease	Ambiguous	2
32069893	NCF1	Knockdown	MIA	Protective	Detrimental	Articular cavity	Rat	2020-02-13	Kim DW	Exogenous	siRNA	MIA	Ambiguous	2
30261507	NCOA3	Knockdown	Surgical - DMM	Detrimental	Protective	Articular cavity	Mouse	2018-09-27	Qi X	Exogenous	sirna	Surgical	Protective	1
32315715	NDST1	Haploinsufficiency	Surgical – ACLT	Protective	Detrimental	Global	Mouse	2020-04-18	Vortkamp A	Genetic		Surgical	Detrimental	2
32315715	NDST1	Removal	Surgical – ACLT	Protective	Detrimental	Cartilage	Mouse	2020-04-18	Vortkamp A	Genetic		Surgical	Detrimental	2
31357086	NEDD9	Knockdown	Surgical - DMM	Protective	Detrimental	Articular cavity	Mouse	2019-07-26	Li X	Exogenous	siRNA	Surgical	Detrimental	1
31634652	NELL1	Deficiency	Spontaneous	Detrimental	Protective	Global	Mouse	2019-10-12	Soo C	Genetic		Ageing	Protective	1
24248346	NFATC1	Removal	Spontaneous	Detrimental	Protective	Cartilage	Mouse	2013-11-18	Aliprantis AO	Genetic		Ageing	Protective	2
19526482	NFATC1	Removal	Spontaneous	Detrimental	Protective	Global	Mouse	2009-10-01	Anderson HC	Genetic		Ageing	Protective	2
30915215	NFATC2	Removal	Spontaneous	Detrimental	Protective	Global	Mouse	2019-03-02	Wang J	Genetic		Ageing	Protective	3
24248346	NFATC2	Removal	Spontaneous	Detrimental	Protective	Cartilage	Mouse	2013-11-18	Aliprantis AO	Genetic		Ageing	Protective	3
21452283	NFATC2	Removal	Spontaneous	Detrimental	Protective	Global	Mouse	2011-08-01	Wang J	Genetic		Ageing	Protective	3
26408027	NFE2L2	Removal	Surgical - DMM	Detrimental	Protective	Global	Mouse	2015-09-26	Cao W	Genetic		Surgical	Protective	3
26408027	NFE2L2	Removal	MIA	Detrimental	Protective	Global	Mouse	2015-09-26	Cao W	Genetic		MIA	Protective	3
32564468	NFE2L2	Activation	Surgical - DMM	Protective	Protective	systemic	Mouse	2020-06-21	Yang Y	Exogenous	Nomilin	Surgical	Protective	3
29604191	NFKBIZ	Overexpression	Spontaneous	Detrimental	Detrimental	Cartilage	Mouse	2018-07-25	Park Y	Genetic		Ageing	Detrimental	2
29604191	NFKBIZ	Removal	Surgical - DMM	Protective	Detrimental	Cartilage	Mouse	2018-07-25	Park Y	Genetic		Surgical	Detrimental	2
30842121	NGF	Removal	Surgical - DMM	Detrimental	Protective	Articular cavity	Mouse	2019-03-06	Chen D	Exogenous	CRISPR	Surgical	Protective	1
26683663	NID2	Removal	Spontaneous	Detrimental	Protective	Global	Mouse	2015-12-10	Miosge N	Genetic		Ageing	Protective	1
14673996	NOS2	Removal	Surgical - DMM + MM	Detrimental	Protective	Global	Mouse	2003-12-01	Mason RM	Genetic		Surgical	Protective	1
26851274	NOTCH1	Deficiency	Surgical - DMM	Detrimental	Protective	Global	Mouse	2016-02-05	Distler JH	Genetic		Surgical	Ambiguous	2
26198357	NOTCH1	Activated	Spontaneous	Detrimental	Detrimental	Cartilage Inducible	Mouse	2015-07-21	Hilton MJ	Genetic		Ageing	Ambiguous	2
29940267	NOTCH2	Activated	Surgical - DMM	Detrimental	Detrimental	Global	Mouse	2018-06-22	Canalis E	Genetic		Surgical	Detrimental	1
31304988	NOX4	Removal	Tibial Compression	Protective	Detrimental	Global	Mouse	2019-08-01	Haudenschild DR	Genetic		Surgical	Detrimental	1
32101625	NPY	Overexpression	Surgical - DMM	Detrimental	Detrimental	Articular cavity	Mouse	2020-02-26	Wu S	Exogenous	Exogenous	Surgical	Detrimental	3
32101625	NPY	Exogenous	Spontaneous	Detrimental	Detrimental	Articular cavity	Mouse	2020-03-12	Wu S	Exogenous	Protein	Ageing	Detrimental	3
32101625	NPY	Exogenous	Surgical - DMM	Detrimental	Detrimental	Articular cavity	Mouse	2020-03-12	Wu S	Exogenous	Protein	Surgical	Detrimental	3
29474860	NR1D1	Inhibition	Surgical - MM	Protective	Detrimental	systemic	Mouse	2018-02-20	Im HJ	Exogenous	SR9009	Surgical	Detrimental	1
25749104	NR1I2	Removal	Spontaneous	Detrimental	Protective	Global	Mouse	2015-03-06	Inoue S	Genetic		Ageing	Protective	1
32258036	NR4A1	Activation	Surgical - MM	Protective	Protective	Articular cavity	Rat	2020-03-17	Wu L	Exogenous	Cytosporone B	Surgical	Protective	1
28492224	NT5E	Removal	Spontaneous	Detrimental	Protective	Global	Mouse	2017-05-11	Cronstein BN	Genetic		Ageing	Protective	1
32003758	NUCB2	Exogenous	Surgical - MM	Protective	Protective	Articular cavity	Rat	2020-01-30	Xiong Y	Exogenous	Protein	Surgical	Protective	1
30143643	NUDT7	Removal	Surgical - DMM	Detrimental	Protective	Global	Mouse	2018-08-24	Jin EJ	Genetic		Surgical	Protective	1
25917196	OCRL	Overexpression	Surgical - ACLT	Protective	Protective	Articular cavity	Mouse	2015-05-01	Zhou Y	Exogenous	Viral	Surgical	Protective	1
28348422	OLR1	Removal	Spontaneous	Protective	Detrimental	Global	Mouse	2017-02-14	Akagi M	Genetic		Ageing	Detrimental	2
26901593	OLR1	Removal	Surgical - DMM	Protective	Detrimental	Global	Mouse	2016-02-22	Akagi M	Genetic		Surgical	Detrimental	2
28097228	OPRK1	Removal	Surgical - Cartilage Injury	Detrimental	Protective	Global	Mouse	2017-01-12	Evseenko D	Genetic		Surgical	Protective	2
32249508	OPRK1	Activation	Surgical - PMM	Protective	Protective	Articular cavity	Mouse	2020-04-05	Evseenko D	Exogenous	JT09	Surgical	Protective	2
29323130	OPTC	Removal	Surgical - DMM	Protective	Detrimental	Global	Mouse	2018-01-11	Martel-Pelletier J	Genetic		Surgical	Detrimental	1
14673992	OSM	exogenous	Spontaneous	Detrimental	Detrimental	Articular cavity	Mouse	2003-12-01	Cawston TE	Exogenous	Protein	Ageing	Detrimental	1
26138248	PANX3	Removal	Surgical - DMM	Protective	Detrimental	Cartilage	Mouse	2015-07-04	Beier F	Genetic		Surgical	Detrimental	1
15882565	PAPSS2	Inhibition	Spontaneous	Detrimental	Protective	Global	Mouse	2005-05-01	Jirik FR	Genetic		Ageing	Protective	1
30659184	PBXIP1	Removal	Surgical - ACLT	Protective	Detrimental	Cartilage	Mouse	2019-01-18	Wang Y	Genetic		Surgical	Detrimental	2
30659184	PBXIP1	Knockdown	Surgical - ACLT	Protective	Detrimental	Articular cavity	Mouse	2019-01-18	Wang Y	Exogenous	siRNA	Surgical	Detrimental	2
31351471	PDPN	Removal	Loading	Protective	Detrimental	Bone	Mouse	2019-07-27	Farquharson C	Genetic		Surgical	Detrimental	1
30143643	PGAM1	Knockdown	Surgical - DMM	Protective	Detrimental	Articular cavity	Mouse	2018-08-24	Jin EJ	Exogenous	siRNA	Surgical	Detrimental	1
21643724	PHEX	Mutation	Spontaneous	Detrimental	Protective	Global	Mouse	2011-06-04	Macica CM	Genetic		Ageing	Protective	1
26746148	PHLPP1	Removal	Surgical - DMM	Protective	Detrimental	Global	Mouse	2015-12-31	Westendorf JJ	Genetic		Surgical	Detrimental	2
29068480	PHLPP1	Inhibition	Surgical - DMM	Protective	Detrimental	Articular cavity	Mouse	2017-11-28	Westendorf JJ	Exogenous	NSC117079	Surgical	Detrimental	2
29068480	PHLPP2	Inhibition	Surgical - DMM	Protective	Detrimental	Articular cavity	Mouse	2017-11-28	Westendorf JJ	Exogenous	NSC117079	Surgical	Detrimental	1
31684073	PINK1	Removal	MIA	Protective	Detrimental	Global	Mouse	2019-11-02	Beom J	Genetic		MIA	Detrimental	1
17549029	PITX1	Haploinsufficiency	Spontaneous	Detrimental	Protective	Global	Mouse	2007-09-01	Moreau A	Genetic		Ageing	Protective	1
25892493	PLAU	exogenous	Spontaneous	Detrimental	Detrimental	Articular cavity	Rat	2015-04-20	Tang JG	Exogenous	Protein	Ageing	Detrimental	1
21378032	POMC	Overexpression	Surgical - ACLT	Protective	Protective	Articular cavity	Rat	2011-03-04	Hsieh JL	Exogenous	adenoviral	Surgical	Protective	1
30729704	PPARA	Activation	Surgical - DMM	Protective	Protective	Articular cavity	Mouse	2019-02-07	Xia C	Exogenous	WY14643	Surgical	Protective	1
25331977	PPARD	Removal	Surgical - DMM	Protective	Detrimental	Cartilage	Mouse	2015-02-01	Beier F	Genetic		Surgical	Detrimental	1
25573665	PPARG	Removal	Surgical - DMM	Detrimental	Protective	Cartilage Inducible	Mouse	2015-01-08	Kapoor M	Genetic		Surgical	Protective	4
23375622	PPARG	Removal	Spontaneous	Detrimental	Protective	Cartilage	Mouse	2013-01-30	Kapoor M	Genetic		Ageing	Protective	4
31239244	PPARG	Removal	Surgical - DMM	Detrimental	Protective	Inducible	Mouse	2019-06-25	Cao W	Genetic		Surgical	Protective	4
15692987	PPARG	Activation	Surgical - MM	Protective	Protective	systemic	Guinea pig	2005-02-01	Pelletier JP	Exogenous	Pioglitazone	Surgical	Protective	4
17599750	PPP3CA	Inhibition	Surgical - DMM	Protective	Detrimental	Articular cavity	Mouse	2007-07-01	Kim WU	Exogenous	Cyclosporin A	Surgical	Detrimental	1
30629676	PRG4	Overexpression	Dominant-negative TGFBR2	Protective	Protective	Global	Mouse	2019-01-10	Serra R	Genetic		Genetic	Protective	9
24834922	PRG4	Removal	Spontaneous	Detrimental	Protective	Global	Mouse	2014-05-16	Nah HD	Genetic		Ageing	Protective	9
23530215	PRG4	Removal	Spontaneous	Detrimental	Protective	Global	Mouse	2013-03-25	Jay GD	Genetic		Ageing	Protective	9
23486780	PRG4	Overexpression	Spontaneous	Protective	Protective	Global	Mouse	2013-03-13	Lee BH	Genetic		Ageing	Protective	9
23486780	PRG4	Overexpression	Surgical - ACLT	Protective	Protective	Global	Mouse	2013-03-13	Lee BH	Genetic		Surgical	Protective	9
31119776	PRG4	Removal	Spontaneous	Detrimental	Protective	Global	Mouse	2019-06-26	Krawetz R	Genetic		Ageing	Protective	9
20506144	PRG4	exogenous	Surgical - ACLT	Protective	Protective	Articular cavity	Mouse	2010-08-01	Elsaid KA	Exogenous	Protein	Surgical	Protective	9
28129516	PRG4	exogenous	Surgical - DMM	Protective	Protective	Articular cavity	Rat	2017-01-27	Fleming BC	Exogenous	Protein	Surgical	Protective	9
30070147	PRG4	Overexpression	Surgical - DMM	Protective	Protective	Articular cavity	Mouse	2018-10-17	Lee BHL	Exogenous	Viral	Surgical	Protective	9
28225087	PRKAA1	Removal	Spontaneous	Detrimental	Protective	Cartilage Inducible	Mouse	2017-02-22	Jiang Q	Genetic		Ageing	Ambiguous	7
28225087	PRKAA1	Removal	Surgical - DMM	Detrimental	Protective	Cartilage Inducible	Mouse	2017-02-22	Jiang Q	Genetic		Surgical	Ambiguous	7
26741062	PRKAA1	Removal	Exercise	No effect	No effect	Cartilage	Mouse	2016-01-07	Jin D	Genetic		Exercise	Ambiguous	7
30031925	PRKAA1	Activation	Spontaneous	Protective	Protective	systemic	Mouse	2018-07-20	Liu-Bryan R	Exogenous	berberine	Ageing	Ambiguous	7
32087740	PRKAA1	Activation	Surgical - DMM	Protective	Protective	Articular cavity	Mouse	2020-02-22	Lei G	Exogenous	Metformin	Surgical	Ambiguous	7
32156705	PRKAA1	Activation	Surgical - DMM	Protective	Protective	systemic	Mouse	2020-03-10	Chen D	Exogenous	Metformin	Surgical	Ambiguous	7
31945013	PRKAA1	Activation	Surgical - DMM	Protective	Protective	systemic	Mouse	2020-01-16	Cai D	Exogenous	Metformin	Surgical	Ambiguous	7
28225087	PRKAA2	Removal	Spontaneous	Detrimental	Protective	Cartilage Inducible	Mouse	2017-02-22	Jiang Q	Genetic		Ageing	Protective	2
28225087	PRKAA2	Removal	Surgical - DMM	Detrimental	Protective	Cartilage Inducible	Mouse	2017-02-22	Jiang Q	Genetic		Surgical	Protective	2
26783110	PRKCD	Removal	Surgical - DMM	Protective	Detrimental	Global	Mouse	2016-01-18	Im HJ	Genetic		Surgical	Detrimental	1
30111653	PTCH1	Removal	Spontaneous	Detrimental	Protective	Global	Mouse	2018-09-20	Yang Y	Genetic		Ageing	Protective	3
19915594	PTCH1	Deficiency	Spontaneous	Detrimental	Protective	Global	Mouse	2009-11-15	Alman BA	Genetic		Ageing	Protective	3
31482846	PTCH1	Removal	Spontaneous	Detrimental	Protective	Forelimb	Mouse	2019-09-04	Li B	Genetic		Ageing	Protective	3
31646013	PTEN	Removal	Spontaneous	Detrimental	Protective	Cartilage	Mouse	2019-08-05	Yang X	Genetic		Ageing	Protective	2
31646013	PTEN	Removal	Spontaneous	Detrimental	Protective	Cartilage Inducible	Mouse	2019-08-05	Yang X	Genetic		Ageing	Protective	2
28544596	PTGDR	Removal	Surgical - DMM	Detrimental	Protective	Global	Mouse	2017-08-01	Fahmi H	Genetic		Surgical	Protective	4
28544596	PTGDR	Removal	Spontaneous	Detrimental	Protective	Global	Mouse	2017-08-01	Fahmi H	Genetic		Ageing	Protective	4
28544596	PTGDR	Removal	Surgical - DMM	Detrimental	Protective	systemic	Mouse	2017-08-01	Fahmi H	Genetic		Surgical	Protective	4
28544596	PTGDR	Activation	Surgical - DMM	Protective	Protective	systemic	Mouse	2017-08-01	Fahmi H	Exogenous	BW245C	Surgical	Protective	4
32336048	PTGDS	Removal	Surgical – DMM	Detrimental	Protective	Global	Mouse	2020-04-26	Fahmi H	Genetic		Surgical	Protective	2
32336048	PTGDS	Overexpression	Surgical - DMM	Protective	Protective	Articular cavity	Mouse	2020-04-26	Fahmi H	Exogenous	Virus	Surgical	Protective	2
31889132	PTGER4	Activation	Surgical - DMM + MM	Protective	Protective	systemic	Mouse	2019-12-30	Saito T	Exogenous	KAG-308	Surgical	Protective	1
18163499	PTGES	Removal	Surgical - DMM + MM	No effect	No effect	Global	Mouse	2008-01-01	Kawaguchi H	Genetic		Surgical	No effect	1
21905007	PTGS2	Removal	Surgical - DMM + MM	No effect	No effect	Global	Mouse	2012-01-01	Kawaguchi H	Genetic		Surgical	Ambiguous	7
32441256	PTGS2	Removal	Surgical – DMM	No effect	No effect	Osteoblasts	Mouse	2020-05-22	Cao X	Genetic		Surgical	Ambiguous	7
21905007	PTGS2	Inhibition	Surgical - DMM + MM	No effect	No effect	systemic	Mouse	2012-01-01	Kawaguchi H	Exogenous	celecoxib	Surgical	Ambiguous	7
29205898	PTGS2	Inhibition	Surgical - ACLT	Protective	Detrimental	systemic	Rabbit	2017-12-05	Jeong KS	Exogenous	celecoxib	Surgical	Ambiguous	7
29622035	PTGS2	Inhibition	Collagenase	No effect	No effect	systemic	Mouse	2018-04-05	Cook AD	Exogenous	SC58128	Protease	Ambiguous	7
31495059	PTGS2	Inhibition	Surgical - ACLT	Protective	Detrimental	systemic	Rat	2019-10-13	Hsuan Jean Y	Exogenous	Etoricoxib	Surgical	Ambiguous	7
31666999	PTGS2	Inhibition	STR/ort	Protective	Detrimental	systemic	Mouse	2019-09-11	Cao X	Exogenous	celecoxib	Surgical	Ambiguous	7
32154622	PTH	Exogenous	Spontaneous	Protective	Protective	systemic	Mouse	2020-03-10	Zhou X	Exogenous	Protein	Ageing	Protective	1
31534047	PTK2	Inhibition	Surgical - DMM	Protective	Detrimental	systemic	Mouse	2019-09-19	Robinson WH	Exogenous	PF-573228	Surgical	Detrimental	3
32518750	PTK2	Inhibition	Surgical - ACLT	Protective	Detrimental	systemic	Mouse	2020-05-19	Cui Z	Exogenous	Defactinib	Surgical	Detrimental	3
32324278	PTK2	Inhibition	Surgical - ACLT	Protective	Detrimental	Subchondral bone	Rat	2020-04-23	Cui Z	Exogenous	Y15	Surgical	Detrimental	3
24257023	RAC1	Overexpression	Surgical - DMM	Detrimental	Detrimental	Articular cavity	Mouse	2013-11-20	Ouyang HW	Exogenous	Viral	Surgical	Detrimental	2
24257023	RAC1	Inhibition	Surgical - ACLT	Protective	Detrimental	Articular cavity	Mouse	2013-11-20	Ouyang HW	Exogenous	NSC23766	Surgical	Detrimental	2
26522700	RBPJ	Removal	Spontaneous	Detrimental	Protective	Cartilage Inducible	Mouse	2015-10-30	Hilton MJ	Genetic		Ageing	Ambiguous	4
23839930	RBPJ	Removal	Spontaneous	Detrimental	Protective	Forelimb	Mouse	2013-10-01	Hilton MJ	Genetic		Ageing	Ambiguous	4
23839930	RBPJ	Removal	Spontaneous	Detrimental	Protective	Cartilage	Mouse	2013-10-01	Hilton MJ	Genetic		Ageing	Ambiguous	4
23319657	RBPJ	Inhibition	Surgical - DMM	Protective	Detrimental	Cartilage Inducible	Mouse	2013-01-14	Kawaguchi H	Genetic		Surgical	Ambiguous	4
27830706	RELA	Removal	Surgical - DMM + MM	Detrimental	Protective	Cartilage Inducible	Mouse	2016-11-10	Saito T	Genetic		Surgical	Ambiguous	4
27830706	RELA	Removal	Spontaneous	Detrimental	Protective	Cartilage Inducible	Mouse	2016-11-10	Saito T	Genetic		Ageing	Ambiguous	4
31981416	RELA	Removal	Spontaneous	Detrimental	Protective	MSC	Mouse	2020-01-25	Deng Q	Genetic		Ageing	Ambiguous	4
27681622	RELA	Knockdown	Surgical - Injury	Protective	Detrimental	Articular cavity	Mouse	2016-09-28	Pham CT	Exogenous	sirna	Surgical	Ambiguous	4
29991473	RHEB	Removal	Collagenase	Protective	Detrimental	Macrophage	Mouse	2018-07-10	Bai X	Genetic		Protease	Ambiguous	2
31229684	RHEB	Overexpression	Surgical - DMM	Protective	Protective	Articular cavity	Mouse	2019-06-20	Lee SH	Exogenous	Viral	Surgical	Ambiguous	2
30542285	RIPK1	Inhibition	Surgical - DMM	Protective	Detrimental	Articular cavity	Mouse	2018-11-27	Chen AM	Exogenous	Necrostatin1	Surgical	Detrimental	1
21325780	ROCK1	Inhibition	MIA	Protective	Detrimental	Articular cavity	Rat	2011-02-16	Shimizu Y	Exogenous	AS1892802	MIA	Detrimental	1
21325780	ROCK2	Inhibition	MIA	Protective	Detrimental	Articular cavity	Rat	2011-02-16	Shimizu Y	Exogenous	AS1892802	MIA	Detrimental	1
30728500	RORA	Overexpression	Surgical - DMM	Detrimental	Detrimental	Cartilage	Mouse	2019-02-06	Chun JS	Genetic		Surgical	Detrimental	3
30728500	RORA	Inhibition	Surgical - DMM	Protective	Detrimental	Global	Mouse	2019-02-06	Chun JS	Genetic		Surgical	Detrimental	3
30728500	RORA	Overexpression	Surgical - DMM	Detrimental	Detrimental	Articular cavity	Mouse	2019-02-06	Chun JS	Exogenous	Viral	Surgical	Detrimental	3
30792936	RPTOR	Removal	Surgical - ACLT	Protective	Detrimental	Global	Mouse	2019-02-20	Bai X	Genetic		Surgical	Detrimental	1
32550912	RSK3	Removal	Surgical - DMM	Detrimental	Protective	Global	Mouse	2020-05-25	Zhou G	Genetic		Surgical	Protective	1
29991473	RSPO2	Inhibition	Collagenase	Protective	Detrimental	Articular cavity	Mouse	2018-07-10	Bai X	Exogenous	antibody	Protease	Detrimental	1
31113964	RUNX1	Removal	Surgical - MMTL+MCL	Detrimental	Protective	Cartilage	Mouse	2019-05-21	Chung UI	Genetic		Surgical	Protective	2
26728350	RUNX1	Overexpression	Surgical - DMM + MM	Protective	Protective	Articular cavity	Mouse	2016-01-05	Ohba S	Exogenous	mRNA	Surgical	Protective	2
28539595	RUNX2	Removal	Surgical - DMM	Protective	Detrimental	Cartilage Inducible	Mouse	2017-05-24	Chen D	Genetic		Surgical	Ambiguous	7
25628784	RUNX2	Overexpression	TGFB and Treadmill	Protective	Protective	Cartilage	Mouse	2014-11-22	Zheng Q	Genetic		Exercise	Ambiguous	7
22095691	RUNX2	Haploinsufficiency	Surgical - DMM	Protective	Detrimental	Global	Mouse	2011-11-17	Kawaguchi H	Genetic		Surgical	Ambiguous	7
22095691	RUNX2	Haploinsufficiency	Spontaneous	Protective	Detrimental	Global	Mouse	2011-11-17	Kawaguchi H	Genetic		Ageing	Ambiguous	7
20525838	RUNX2	Overexpression	Spontaneous	No effect	No effect	Global	Mouse	2010-06-04	Cohen-Solal ME	Genetic		Ageing	Ambiguous	7
16868966	RUNX2	Haploinsufficiency	Surgical - DMM + MM	Protective	Detrimental	Global	Mouse	2006-08-01	Kawaguchi H	Genetic		Surgical	Ambiguous	7
31189030	RUNX2	Overexpression	Surgical - MLI	Detrimental	Detrimental	Cartilage Inducible	Mouse	2019-06-12	Jonason JH	Genetic		Surgical	Ambiguous	7
25180294	S100A9	Removal	Surgical - DMM	No effect	No effect	Global	Mouse	2014-09-01	van Lent PL	Genetic		Surgical	Ambiguous	6
25180294	S100A9	Removal	Collagenase	Protective	Detrimental	Global	Mouse	2014-09-01	van Lent PL	Genetic		Protease	Ambiguous	6
22143922	S100A9	Removal	Collagenase	Protective	Detrimental	Global	Mouse	2012-05-01	van den Berg WB	Genetic		Protease	Ambiguous	6
22143922	S100A9	Removal	Surgical - DMM	No effect	No effect	Global	Mouse	2012-05-01	van den Berg WB	Genetic		Surgical	Ambiguous	6
25969431	S100A9	Inhibition	Surgical - DMM	Protective	Detrimental	systemic	Mouse	2015-05-12	van Lent PL	Exogenous	paquinimod	Surgical	Ambiguous	6
25969431	S100A9	Inhibition	Collagenase	Protective	Detrimental	systemic	Mouse	2015-05-12	van Lent PL	Exogenous	paquinimod	Protease	Ambiguous	6
19684582	SDC4	Removal	Surgical - DMM + MM	Protective	Detrimental	Global	Mouse	2009-08-16	Pap T	Genetic		Surgical	Detrimental	2
19684582	SDC4	Inhibition	Surgical - DMM + MM	Protective	Detrimental	Articular cavity	Mouse	2009-08-16	Pap T	Exogenous	Antibody	Surgical	Detrimental	2
28893232	SERPINE1	Removal	Surgical - DMM	Detrimental	Protective	Global	Mouse	2017-09-11	Kaji H	Genetic		Surgical	Protective	1
24056368	SETDB1	Removal	Spontaneous	Detrimental	Protective	Forelimb	Mouse	2013-09-20	Yang L	Genetic		Ageing	Protective	1
25450854	SFRP1	Removal	Surgical - DMM	Detrimental	Protective	Global	Mouse	2014-10-30	Lories RJ	Genetic		Surgical	Protective	1
32308389	SHC1	Knockdown	MIA	Protective	Detrimental	Articular cavity	Rat	2020-04-08	Kim DW	Exogenous	siRNA	MIA	Detrimental	1
26103880	SHMT2	Overexpression	Surgical - DMM	Detrimental	Detrimental	Articular cavity	Mouse	2015-06-24	Jin EJ	Exogenous	Viral	Surgical	Detrimental	2
26103880	SHMT2	Knockdown	Surgical - DMM	Protective	Detrimental	Articular cavity	Mouse	2015-06-24	Jin EJ	Exogenous	siRNA	Surgical	Detrimental	2
27009967	SIK3	Removal	Surgical - DMM	Protective	Detrimental	Cartilage Inducible	Mouse	2016-03-24	Tsumaki N	Genetic		Surgical	Detrimental	2
27009967	SIK3	Inhibition	Surgical - DMM	Protective	Detrimental	Articular cavity	Mouse	2016-03-24	Tsumaki N	Exogenous	pterosin B	Surgical	Detrimental	2
23723318	SIRT1	Removal	Surgical - DMM + MM	Detrimental	Protective	Cartilage	Mouse	2013-05-30	Kurosaka M	Genetic		Surgical	Protective	10
23723318	SIRT1	Removal	Spontaneous	Detrimental	Protective	Cartilage	Mouse	2013-05-30	Kurosaka M	Genetic		Ageing	Protective	10
23587642	SIRT1	Removal	Spontaneous	Detrimental	Protective	Global	Mouse	2013-04-13	McBurney MW	Genetic		Ageing	Protective	10
23124828	SIRT1	Inhibition	Spontaneous	Detrimental	Protective	Global	Mouse	2013-01-01	McBurney MW	Genetic		Ageing	Protective	10
22258484	SIRT1	Haploinsufficiency	Spontaneous	Detrimental	Protective	Global	Mouse	2012-01-17	Dvir-Ginzberg M	Genetic		Ageing	Protective	10
32665267	SIRT1	Removal	Surgical – DMM	Detrimental	Protective	Cartilage	Mouse	2020-07-14	Dvir-Ginzberg M	Genetic		Surgical	Protective	10
32499111	SIRT1	Removal	Spontaneous	Detrimental	Protective	Cartilage Inducible	Mouse	2020-06-01	Wu S	Genetic		Ageing	Protective	10
32499111	SIRT1	Removal	Surgical – DMM	Detrimental	Protective	Cartilage Inducible	Mouse	2020-06-01	Wu S	Genetic		Surgical	Protective	10
29922443	SIRT1	Activation	Surgical - DMM	Protective	Protective	systemic	Mouse	2018-05-05	Kuroda R	Exogenous	SRT1720	Surgical	Protective	10
31989845	SIRT1	Activation	Surgical - DMM	Protective	Protective	Articular cavity	Mouse	2020-01-28	Matsushita T	Exogenous	SRT2104	Surgical	Protective	10
26639398	SIRT6	Overexpression	Surgical - DMM	Protective	Protective	Articular cavity	Mouse	2015-12-07	Pan Z	Exogenous	Viral	Surgical	Protective	1
29402405	SIRT7	Removal	Spontaneous	Protective	Detrimental	Global	Mouse	2018-02-02	Yamagata K	Genetic		Ageing	Detrimental	2
29402405	SIRT7	Removal	Treadmill	Protective	Detrimental	Global	Mouse	2018-02-02	Yamagata K	Genetic		Exercise	Detrimental	2
24529376	SLC39A8	Overexpression	Surgical - DMM	Detrimental	Detrimental	Cartilage	Mouse	2014-02-13	Chun JS	Genetic		Surgical	Detrimental	4
24529376	SLC39A8	Removal	Surgical - DMM	Protective	Detrimental	Cartilage	Mouse	2014-02-13	Chun JS	Genetic		Surgical	Detrimental	4
24529376	SLC39A8	Overexpression	Spontaneous	Detrimental	Detrimental	Articular cavity	Mouse	2014-02-13	Chun JS	Exogenous	Viral	Ageing	Detrimental	4
26241779	SLC39A8	Overexpression	Spontaneous	Detrimental	Detrimental	Articular cavity	Mouse	2015-08-01	Chun JS	Exogenous	Viral	Ageing	Detrimental	4
20506210	SMAD3	Removal	Spontaneous	Detrimental	Protective	Global	Mouse	2010-08-01	O'Keefe RJ	Genetic		Ageing	Protective	4
11285272	SMAD3	Removal	Spontaneous	Detrimental	Protective	Global	Mouse	2001-04-02	Deng CX	Genetic		Ageing	Protective	4
26272361	SMAD3	Removal	Spontaneous	Detrimental	Protective	Global	Mouse	2015-08-10	Tanaka E	Genetic		Ageing	Protective	4
22674505	SMAD3	Removal	Spontaneous	Detrimental	Protective	Global	Mouse	2012-10-01	Alliston T	Genetic		Ageing	Protective	4
14673995	SMAD6	Overexpression	papain	Protective	Protective	Articular cavity	Mouse	2003-12-01	van den Berg WB	Exogenous	Viral	Protease	Protective	1
14673995	SMAD7	Overexpression	papain	Protective	Protective	Articular cavity	Mouse	2003-12-01	van den Berg WB	Exogenous	Viral	Protease	Protective	1
27018594	SMO	Activated	Surgical - DMM	Detrimental	Detrimental	Cartilage Inducible	Mouse	2016-03-28	Alman BA	Genetic		Surgical	Detrimental	5
19915594	SMO	Activated	Spontaneous	Detrimental	Detrimental	Cartilage	Mouse	2009-11-15	Alman BA	Genetic		Ageing	Detrimental	5
19915594	SMO	Removal	Surgical - MM	Protective	Detrimental	Cartilage Inducible	Mouse	2009-11-15	Alman BA	Genetic		Surgical	Detrimental	5
31608494	SMO	Removal	Surgical -ACLT	Protective	Detrimental	Inducible	Mouse	2019-10-24	Sakai A	Genetic		Surgical	Detrimental	5
31608494	SMO	Removal	Surgical - ACLT + Climbing	Protective	Detrimental	Cartilage Inducible	Mouse	2019-10-24	Sakai A	Genetic		Surgical	Detrimental	5
26815610	SMURF2	Removal	Surgical - DMM	Protective	Detrimental	Global	Mouse	2016-01-27	Song J	Genetic		Surgical	Ambiguous	3
26815610	SMURF2	Removal	Spontaneous	No effect	No effect	Global	Mouse	2016-01-27	Song J	Genetic		Ageing	Ambiguous	3
18821706	SMURF2	Overexpression	Spontaneous	Detrimental	Detrimental	Cartilage	Mouse	2008-10-01	Rosier RN	Genetic		Ageing	Ambiguous	3
26108578	SOD2	Removal	Spontaneous	Detrimental	Protective	Cartilage	Mouse	2015-06-25	Shimizu T	Genetic		Ageing	Protective	2
26108578	SOD2	Removal	Surgical - DMM	Detrimental	Protective	Cartilage	Mouse	2015-06-25	Shimizu T	Genetic		Surgical	Protective	2
25593283	SOD3	Inhibition	Treadmill	Detrimental	Protective	Global	Mouse	2015-01-15	Regan EA	Genetic		Exercise	Protective	1
29377313	SOST	Overexpression	Tibial compression	Protective	Protective	Global	Mouse	2018-04-02	Loots GG	Genetic		Surgical	Ambiguous	6
25656376	SOST	Removal	Surgical - DMM	Detrimental	Protective	Global	Mouse	2015-02-06	Cohen-Solal M	Genetic		Surgical	Ambiguous	6
23233270	SOST	Removal	Spontaneous	No effect	No effect	Global	Mouse	2013-03-01	Babij P	Genetic		Ageing	Ambiguous	6
31966426	SOST	Overexpression	Surgical - DMM	Detrimental	Detrimental	Global	Mouse	2017-11-01	Jiang Q	Genetic		Surgical	Ambiguous	6
31828128	SOST	Removal	Surgical – ACLT	Detrimental	Protective	Global	Mouse	2019-11-11	Bai D	Genetic		Surgical	Ambiguous	6
23233270	SOST	Inhibition	Surgical - Meniscus Tear	No effect	No effect	Articular cavity	Rat	2013-03-01	Babij P	Exogenous	Antibody	Surgical	Ambiguous	6
32269734	SOX9	Overexpression	Spontaneous	Detrimental	Detrimental	Hypertrophic cartilage	Mouse	2020-03-15	Zhou G	Genetic		Ageing	Ambiguous	2
31496660	SOX9	Overexpression	Surgical - DMM	Protective	Protective	Articular cavity	Mouse	2019-08-13	Li Y	Exogenous	Viral	Surgical	Ambiguous	2
21346391	SPHK2	Inhibition	MIA	Protective	Detrimental			2011-02-22	Smith CD	Exogenous	ABC294640	MIA	Detrimental	1
19644889	SPP1	Deficiency	Surgical - DMM + MM	Detrimental	Protective	Global	Mouse	2009-08-01	Uede T	Genetic		Surgical	Protective	2
19644889	SPP1	Deficiency	Spontaneous	Detrimental	Protective	Global	Mouse	2009-08-01	Uede T	Genetic		Ageing	Protective	2
28464560	ST14	Inhibition	Surgical - DMM	Protective	Detrimental	Articular cavity	Mouse	2017-07-05	Rowan AD	Exogenous	Compound 59	Surgical	Detrimental	2
28464560	ST14	Inhibition	Surgical - DMM	Protective	Detrimental	systemic	Mouse	2017-07-05	Rowan AD	Exogenous	Antibody	Surgical	Detrimental	2
28252046	ST3GAL5	Removal	Surgical - Injury	Protective	Detrimental	Global	Mouse	2017-03-02	Iwasaki N	Genetic		Surgical	Ambiguous	3
24333297	ST3GAL5	Removal	Surgical - DMM + MM	Detrimental	Protective	Global	Mouse	2013-12-12	Iwasaki N	Genetic		Surgical	Ambiguous	3
24333297	ST3GAL5	Removal	Spontaneous	Detrimental	Protective	Global	Mouse	2013-12-12	Iwasaki N	Genetic		Ageing	Ambiguous	3
30471358	ST8SIA1	Removal	Spontaneous	Detrimental	Protective	Global	Mouse	2018-11-22	Iwasaki N	Genetic		Ageing	Protective	1
30385786	STK3	Removal	Surgical - DMM	Protective	Detrimental	Cartilage	Mouse	2018-11-01	Mak KK	Genetic		Surgical	Detrimental	2
30385786	STK3	Removal	Surgical - ACLT	Protective	Detrimental	Cartilage	Mouse	2018-11-01	Mak KK	Genetic		Surgical	Detrimental	2
30385786	STK4	Removal	Surgical - DMM	Protective	Detrimental	Cartilage	Mouse	2018-11-01	Mak KK	Genetic		Surgical	Detrimental	2
30385786	STK4	Removal	Surgical - ACLT	Protective	Detrimental	Cartilage	Mouse	2018-11-01	Mak KK	Genetic		Surgical	Detrimental	2
20479257	SULF1	Removal	Spontaneous	Detrimental	Protective	Global	Mouse	2010-05-17	Lotz MK	Genetic		Ageing	Protective	3
20479257	SULF1	Removal	Surgical - DMM	Detrimental	Protective	Global	Mouse	2010-05-17	Lotz MK	Genetic		Surgical	Protective	3
27808352	SULF1	Overexpression	Surgical - DMM	Protective	Protective	Articular cavity	Mouse	2016-11-03	Neo M	Exogenous	Protein	Surgical	Protective	3
20479257	SULF2	Removal	Spontaneous	Detrimental	Protective	Global	Mouse	2010-05-17	Lotz MK	Genetic		Ageing	Protective	2
20479257	SULF2	Removal	Surgical - DMM	Detrimental	Protective	Global	Mouse	2010-05-17	Lotz MK	Genetic		Surgical	Protective	2
31926346	TAC1	Removal	Surgical - DMM	Detrimental	Protective	Global	Mouse	2020-01-08	Grässel S	Genetic		Surgical	Protective	1
32295898	TET1	Removal	Surgical – DMM	Protective	Detrimental	Global	Mouse	2020-04-15	Bhutani N	Genetic		Surgical	Detrimental	2
32295898	TET1	Inhibition	Surgical - DMM	Protective	Detrimental	Articular cavity	Mouse	2020-04-15	Bhutani N	Exogenous	2-HG	Surgical	Detrimental	2
25964075	TFAP2E	Removal	Surgical - DMM	Detrimental	Protective	Global	Mouse	2015-05-12	Bosserhoff AK	Genetic		Surgical	Protective	1
30154423	TFEB	Overexpression	Surgical - DMM	Protective	Protective	Articular cavity	Mouse	2018-08-28	Zhang X	Exogenous	Viral	Surgical	Protective	1
27457421	TGFA	Removal	Surgical - DMM	Protective	Detrimental	Global	Mouse	2016-07-26	Beier F	Genetic		Surgical	Ambiguous	2
27457421	TGFA	Removal	Spontaneous	No effect	No effect	Global	Mouse	2016-07-26	Beier F	Genetic		Ageing	Ambiguous	2
24309371	TGFB1	Activated	Spontaneous	Detrimental	Detrimental	Bone	Mouse	2013-12-05	Wang M	Genetic		Ageing	Ambiguous	7
23685840	TGFB1	Activated	Spontaneous	Detrimental	Detrimental	Global	Mouse	2013-05-19	Cao X	Genetic		Ageing	Ambiguous	7
11237660	TGFB1	Overexpression	Spontaneous	Detrimental	Detrimental	Articular cavity	Mouse	2001-02-01	van den Berg WB	Exogenous	Viral	Ageing	Ambiguous	7
12077282	TGFB1	Removal	papain	Protective	Detrimental	Articular cavity	Mouse	2002-07-01	van den Berg WB	Exogenous	soluble TGF-beta-RII	Protease	Ambiguous	7
14673995	TGFB1	Inhibition	papain	Detrimental	Protective	Articular cavity	Mouse	2003-12-01	van den Berg WB	Exogenous	MLAP-1	Protease	Ambiguous	7
14673995	TGFB1	Overexpression	papain	Protective	Protective	Articular cavity	Mouse	2003-12-01	van den Berg WB	Exogenous	Viral	Protease	Ambiguous	7
26837060	TGFB1	Inhibition	Surgical - ACLT	Protective	Detrimental	systemic	Mouse	2016-02-02	Cao X	Exogenous	Antibody	Surgical	Ambiguous	7
31673109	TGFB1I1	Removal	Surgical - DMM + MM	Protective	Detrimental	Global	Mouse	2019-10-31	Miyazaki A	Genetic		Surgical	Detrimental	1
30078186	TGFBR1	Removal	Spontaneous	Detrimental	Protective	Cartilage Inducible	Mouse	2018-08-05	Chen L	Genetic		Ageing	Ambiguous	4
28716756	TGFBR1	Removal	Spontaneous	Detrimental	Protective	Cartilage Inducible	Mouse	2017-07-14	Chen L	Genetic		Ageing	Ambiguous	4
23685840	TGFBR1	Inhibition	Surgical - ACLT	Protective	Detrimental	systemic	Rat	2013-05-19	Cao X	Exogenous	SB505124	Surgical	Ambiguous	4
23685840	TGFBR1	Inhibition	Surgical - ACLT	Protective	Detrimental	Bone	Rat	2013-05-19	Cao X	Exogenous	Antibody	Surgical	Ambiguous	4
26355014	TGFBR2	Removal	Spontaneous	No effect	No effect	Cartilage Inducible	Mouse	2015-09-04	Xu L	Genetic		Ageing	Ambiguous	7
26355014	TGFBR2	Removal	Surgical - DMM	Protective	Detrimental	Cartilage Inducible	Mouse	2015-09-04	Xu L	Genetic		Surgical	Ambiguous	7
23982761	TGFBR2	Removal	Spontaneous	Detrimental	Protective	Cartilage Inducible	Mouse	2013-12-01	Chen D	Genetic		Ageing	Ambiguous	7
23685840	TGFBR2	Removal	Surgical - ACLT	Protective	Detrimental	MSC	Mouse	2013-05-19	Cao X	Genetic		Surgical	Ambiguous	7
31068441	TGFBR2	Removal	Spontaneous	Detrimental	Protective	Forelimb Inducible	Mouse	2019-05-08	Spagnoli A	Genetic		Ageing	Ambiguous	7
31068441	TGFBR2	Removal	Surgical	Detrimental	Protective	Forelimb Inducible	Mouse	2019-05-08	Spagnoli A	Genetic		Surgical	Ambiguous	7
26355014	TGFBR2	Inhibition	Surgical - DMM	Protective	Detrimental	systemic	Mouse	2015-09-04	Xu L	Exogenous	losartan	Surgical	Ambiguous	7
20309955	THBS1	Overexpression	Surgical - ACLT	Protective	Protective	Articular cavity	Mouse	2010-10-01	Wu CL	Exogenous	Viral	Surgical	Protective	1
22664108	TIMP2	Removal	Surgical - DMM	Detrimental	Protective	Global	Mouse	2012-06-01	Xiao T	Genetic		Surgical	Protective	1
30379418	TIMP3	Overexpression	STR/ORT	Protective	Protective	Cartilage	Mouse	2019-02-14	Bou-Gharios G	Genetic		Genetic	Protective	3
17328064	TIMP3	Removal	Spontaneous	Detrimental	Protective	Global	Mouse	2007-03-01	Mort JS	Genetic		Ageing	Protective	3
32518385	TIMP3	Overexpression	Surgical – DMM	Protective	Protective	Cartilage	Mouse	2020-06-09	Bou-Gharios G	Genetic		Surgical	Protective	3
24703622	TLR1	Removal	Surgical - DMM +MM	No effect	No effect	Global	Mouse	2014-04-02	Busso N	Genetic		Surgical	No effect	1
24703622	TLR2	Removal	Surgical - DMM +MM	No effect	No effect	Global	Mouse	2014-04-02	Busso N	Genetic		Surgical	No effect	1
31044181	TLR4	Removal	High Fat Diet	Protective	Detrimental	Global	Mouse	2018-10-04	Humphrey MB	Genetic		High Fat Diet	Ambiguous	3
26245312	TLR4	Removal	Surgical - DMM	No effect	No effect	Global	Mouse	2015-11-01	Malfait AM	Genetic		Surgical	Ambiguous	3
24703622	TLR4	Removal	Surgical - DMM +MM	No effect	No effect	Global	Mouse	2014-04-02	Busso N	Genetic		Surgical	Ambiguous	3
30240938	TLR5	Removal	Spontaneous	No effect	No effect	Global	Mouse	2018-09-18	Hernandez CJ	Genetic		Ageing	No effect	1
24703622	TLR6	Removal	Surgical - DMM +MM	No effect	No effect	Global	Mouse	2014-04-02	Busso N	Genetic		Surgical	No effect	1
19747998	TNC	Removal	Surgical - DMM + ACL	Detrimental	Protective	Global	Mouse	2009-09-06	Uchida A	Genetic		Surgical	Protective	3
19747998	TNC	Removal	Spontaneous	Detrimental	Protective	Global	Mouse	2009-09-06	Uchida A	Genetic		Ageing	Protective	3
29219023	TNC	exogenous	Surgical - DMM + ACLT	Protective	Protective	Articular cavity	Mouse	2016-12-04	Sudo A	Exogenous	Protein	Surgical	Protective	3
29622035	TNF	Removal	Collagenase	No effect	No effect	Global	Mouse	2018-04-05	Cook AD	Genetic		Protease	Ambiguous	5
26713606	TNF	Removal	High Fat Diet	Protective	Detrimental	Global	Mouse	2016-06-01	Mooney RA	Genetic		High Fat Diet	Ambiguous	5
14673992	TNF	exogenous	Spontaneous	Detrimental	Detrimental	Articular cavity	Mouse	2003-12-01	Cawston TE	Exogenous	Protein	Ageing	Ambiguous	5
26108147	TNF	Knockdown	Surgical - DMM + ACL + MM	Protective	Detrimental	Articular cavity	Rabbit	2015-07-20	Liao Q	Exogenous	siRNA	Surgical	Ambiguous	5
26445328	TNF	Inhibition	Surgical - ACLT	Protective	Detrimental	systemic	Rat	2015-07-31	Yi CQ	Exogenous	adalimumab	Surgical	Ambiguous	5
29564448	TNFAIP6	Overexpression	Surgical - DMM	Protective	Protective	Articular cavity	Rat	2018-05-01	Temenoff JS	Exogenous	Exogenous	Surgical	Protective	1
30623241	TNFRSF11B	Removal	Surgical – TMJ	Detrimental	Protective	Global	Mouse	2019-01-08	Wang P	Genetic		Surgical	Protective	8
27541035	TNFRSF11B	Removal	Spontaneous	Detrimental	Protective	Global	Mouse	2016-08-19	Zhang Q	Genetic		Ageing	Protective	8
26018435	TNFRSF11B	Removal	Spontaneous	Detrimental	Protective	Global	Mouse	2015-05-27	Simonet WS	Genetic		Ageing	Protective	8
17907189	TNFRSF11B	Haploinsufficiency	Spontaneous	Detrimental	Protective	Global	Mouse	2007-10-01	Muneta T	Genetic		Ageing	Protective	8
17907189	TNFRSF11B	Haploinsufficiency	Surgical - DMM	Detrimental	Protective	Global	Mouse	2007-10-01	Muneta T	Genetic		Surgical	Protective	8
17907189	TNFRSF11B	exogenous	Surgical - DMM	Protective	Protective	Articular cavity	Mouse	2007-10-01	Muneta T	Exogenous	Protein	Surgical	Protective	8
18668550	TNFRSF11B	exogenous	Surgical - DMM + MM	Protective	Protective	Articular cavity	Mouse	2008-08-01	Cohen-Solal ME	Exogenous	Protein	Surgical	Protective	8
23723320	TNFRSF11B	exogenous	MIA	Protective	Protective	systemic	Rat	2013-05-30	Chapman V	Exogenous	Protein	MIA	Protective	8
28648299	TNFSF11	Activation	MIA	Protective	Protective	Articular cavity	Mouse	2017-06-13	Aoki K	Exogenous	OP3-4	MIA	Protective	1
29415892	TNKS	Inhibition	Surgical - DMM	Protective	Detrimental	Articular cavity	Mouse	2018-02-08	Young PP	Exogenous	XAV-939	Surgical	Detrimental	3
31653858	TNKS	Inhibition	Surgical - DMM	Protective	Detrimental	Articular cavity	Mouse	2019-10-25	Kim JH	Exogenous	XAV939	Surgical	Detrimental	3
31653858	TNKS	Inhibition	Surgical - DMM	Protective	Detrimental	Articular cavity	Mouse	2019-10-25	Kim JH	Exogenous	IWR-1	Surgical	Detrimental	3
31653858	TNKS2	Inhibition	Surgical - DMM	Protective	Detrimental	Articular cavity	Mouse	2019-10-25	Kim JH	Exogenous	XAV939	Surgical	Detrimental	2
31653858	TNKS2	Inhibition	Surgical - DMM	Protective	Detrimental	Articular cavity	Mouse	2019-10-25	Kim JH	Exogenous	IWR-1	Surgical	Detrimental	2
27792866	TP63	Removal	Spontaneous	Protective	Detrimental	Cartilage	Mouse	2017-03-01	Saito T	Genetic		Ageing	Detrimental	2
27792866	TP63	Removal	Surgical - DMM + MM	Protective	Detrimental	Cartilage	Mouse	2017-03-01	Saito T	Genetic		Surgical	Detrimental	2
32431699	TRAF3	Overexpression	Surgical – DMM	Protective	Protective	Global	Mouse	2020-05-05	Cho ML	Genetic		Surgical	Protective	2
32416098	TRAF3	Knockdown	Surgical - DMM	Detrimental	Protective	Articular cavity	Mouse	2020-05-19	Zhang X	Exogenous	siRNA	Surgical	Protective	2
26521748	TRPA1	Removal	MIA	Protective	Detrimental	Global	Mouse	2015-11-01	Moilanen E	Genetic		MIA	Detrimental	1
27388701	TRPV4	Removal	Surgical - DMM	No effect	No effect	Cartilage Inducible	Mouse	2016-07-08	Guilak F	Genetic		Surgical	Ambiguous	4
27388701	TRPV4	Removal	Spontaneous	Protective	Detrimental	Cartilage Inducible	Mouse	2016-07-08	Guilak F	Genetic		Ageing	Ambiguous	4
23178209	TRPV4	Removal	High Fat Diet	Detrimental	Protective	Global	Mouse	2012-11-23	Guilak F	Genetic		High Fat Diet	Ambiguous	4
20583100	TRPV4	Removal	Spontaneous	Detrimental	Protective	Global	Mouse	2010-10-01	Guilak F	Genetic		Ageing	Ambiguous	4
28063212	TRPV6	Removal	Surgical - ACLT	Detrimental	Protective	Global	Mouse	2017-04-10	Ye T	Genetic		Surgical	Protective	1
31007149	TSC1	Removal	Surgical - UAC	Detrimental	Protective	Cartilage	Mouse	2019-04-21	Wang M	Genetic		Surgical	Protective	9
30792936	TSC1	Removal	Surgical - ACLT	Detrimental	Protective	Global	Mouse	2019-02-20	Bai X	Genetic		Surgical	Protective	9
30408629	TSC1	Removal	Surgical - DMM	Detrimental	Protective	B cells	Mouse	2018-11-06	Cai DZ	Genetic		Surgical	Protective	9
30145794	TSC1	Removal	Spontaneous	Detrimental	Protective	Cartilage	Mouse	2018-08-26	Bai X	Genetic		Ageing	Protective	9
29991473	TSC1	Removal	Collagenase	Detrimental	Protective	Macrophage	Mouse	2018-07-10	Bai X	Genetic		Protease	Protective	9
29329496	TSC1	Removal	Surgical - DMM	Detrimental	Protective	Cartilage	Mouse	2018-03-24	Bai X	Genetic		Surgical	Protective	9
29329496	TSC1	Removal	Surgical - DMM	Detrimental	Protective	Cartilage Inducible	Mouse	2018-03-24	Bai X	Genetic		Surgical	Protective	9
28043938	TSC1	Removal	Surgical - DMM	Detrimental	Protective	Cartilage Inducible	Mouse	2016-12-31	Cai D	Genetic		Surgical	Protective	9
28043938	TSC1	Removal	Spontaneous	Detrimental	Protective	Cartilage Inducible	Mouse	2016-12-31	Cai D	Genetic		Ageing	Protective	9
28941045	TTR	Removal	Surgical - DMM	Detrimental	Protective	Global	Mouse	2017-09-22	Lotz MK	Genetic		Surgical	Ambiguous	3
28941045	TTR	Overexpression	Surgical - DMM	Detrimental	Detrimental	Global	Mouse	2017-09-22	Lotz MK	Genetic		Surgical	Ambiguous	3
28941045	TTR	Overexpression	Spontaneous	Detrimental	Detrimental	Global	Mouse	2017-09-22	Lotz MK	Genetic		Ageing	Ambiguous	3
30302948	TUT7	Removal	Surgical - DMM	Protective	Detrimental	Global	Mouse	2019-03-06	Haqqi TM	Genetic		Surgical	Detrimental	1
30258877	TWIST1	Activated	Surgical - DMM	Protective	Protective	Cartilage	Mouse	2016-02-24	Drissi H	Genetic		Surgical	Protective	1
31044181	TYROBP	Removal	High Fat Diet	Detrimental	Protective	Global	Mouse	2018-10-04	Humphrey MB	Genetic		High Fat Diet	Protective	1
32640182	UCMA	Exogenous	MIA	Protective	Protective	Articular cavity	Rat	2020-07-08	Kalaci A	Exogenous	Protein	MIA	Protective	1
22391889	UGCG	Removal	Spontaneous	Detrimental	Protective	Cartilage	Mouse	2012-08-01	Iwasaki N	Genetic		Ageing	Protective	2
22391889	UGCG	Removal	Surgical - DMM + MM	Detrimental	Protective	Cartilage	Mouse	2012-08-01	Iwasaki N	Genetic		Surgical	Protective	2
29026147	VEGFA	Haploinsufficiency	Surgical - DMM	Protective	Detrimental	Cartilage	Mouse	2017-10-12	Olsen BR	Genetic		Surgical	Detrimental	6
25230745	VEGFA	Inhibition	Surgical - ACLT	Protective	Detrimental	Articular cavity	Rabbit	2014-09-18	Mochida J	Exogenous	Bevacizumab	Surgical	Detrimental	6
26531672	VEGFA	exogenous	Spontaneous	Detrimental	Detrimental	Articular cavity	Mouse	2015-11-04	Yang C	Exogenous	Protein	Ageing	Detrimental	6
29026147	VEGFA	Inhibition	Surgical - DMM	Protective	Detrimental	Articular cavity	Mouse	2017-10-12	Olsen BR	Exogenous	Antibody	Surgical	Detrimental	6
29329496	VEGFA	Inhibition	Surgical - DMM	Protective	Detrimental	Articular cavity	Mouse	2018-03-24	Bai X	Exogenous	bevacizumab	Surgical	Detrimental	6
29488610	VEGFA	exogenous	Surgical - ACLT	Detrimental	Detrimental	Articular cavity	Rat	2018-02-28	Weng JQ	Exogenous	Protein	Surgical	Detrimental	6
24999110	VHL	Removal	Spontaneous	Detrimental	Protective	Cartilage Inducible	Mouse	2014-07-04	Chen L	Genetic		Ageing	Protective	2
24999110	VHL	Removal	Surgical - DMM	Detrimental	Protective	Cartilage Inducible	Mouse	2014-07-04	Chen L	Genetic		Surgical	Protective	2
30745310	WNT16	Removal	Surgical - ACLT	Detrimental	Protective	Cartilage	Mouse	2019-02-11	Mak KK	Genetic		Surgical	Ambiguous	5
27147711	WNT16	Removal	Surgical - DMM	Detrimental	Protective	Global	Mouse	2016-05-04	Dell'Accio F	Genetic		Surgical	Ambiguous	5
32140758	WNT16	Overexpression	Surgical - DMM	No effect	No effect	Osteoblasts	Mouse	2020-03-05	Movérare-Skrtic S	Genetic		Surgical	Ambiguous	5
25976248	WNT16	Overexpression	Spontaneous	Detrimental	Detrimental	Articular cavity	Mouse	2015-05-12	van der Kraan PM	Exogenous	Viral	Ageing	Ambiguous	5
30745310	WNT16	Overexpression	Surgical - ACLT	Protective	Protective	Articular cavity	Mouse	2019-02-11	Mak KK	Exogenous	Viral	Surgical	Ambiguous	5
32151961	WNT3A	Inhibition	Surgical - DMM	Protective	Detrimental	Articular cavity	Mouse	2020-03-06	He W	Exogenous	FzD7 CRD	Surgical	Detrimental	1
25976248	WNT5A	Overexpression	Spontaneous	No effect	No effect	Articular cavity	Mouse	2015-05-12	van der Kraan PM	Exogenous	Viral	Ageing	No effect	1
28165497	WNT7A	Overexpression	Surgical - DMM	Protective	Protective	Articular cavity	Mouse	2017-02-06	Zeng L	Exogenous	Viral	Surgical	Protective	1
25976248	WNT8A	Overexpression	Spontaneous	Detrimental	Detrimental	Articular cavity	Mouse	2015-05-12	van der Kraan PM	Exogenous	Viral	Ageing	Detrimental	1
31160553	WWP2	Removal	Spontaneous	Detrimental	Protective	Global	Mouse	2019-06-03	Asahara H	Genetic		Ageing	Protective	3
31160553	WWP2	Removal	Surgical - DMM	Detrimental	Protective	Global	Mouse	2019-06-03	Asahara H	Genetic		Surgical	Protective	3
31160553	WWP2	Overexpression	Surgical - DMM	Protective	Protective	Articular cavity	Mouse	2019-06-03	Asahara H	Exogenous	mRNA	Surgical	Protective	3
26903297	XDH	Inhibition	High Fat Diet	Protective	Detrimental	systemic	Mouse	2016-02-20	Asou Y	Exogenous	febuxostat	High Fat Diet	Detrimental	1
30385786	YAP1	Overexpression	Surgical - ACLT	Detrimental	Protective	Cartilage	Mouse	2018-11-01	Mak KK	Genetic		Surgical	Ambiguous	4
30385786	YAP1	Removal	Surgical - DMM	Protective	Protective	Cartilage	Mouse	2018-11-01	Mak KK	Genetic		Surgical	Ambiguous	4
30465058	YAP1	Knockdown	Surgical - ACLT	Protective	Detrimental	Articular cavity	Mouse	2018-11-21	Yu B	Exogenous	siRNA	Surgical	Ambiguous	4
30933975	YAP1	Overexpression	Surgical - ACLT	Protective	Protective	Articular cavity	Mouse	2019-04-01	Liu GH	Exogenous	Viral	Surgical	Ambiguous	4
30622281	ZFP36L1	Removal	Surgical - DMM	Protective	Detrimental	Global	Mouse	2019-01-08	Chun JS	Genetic		Surgical	Detrimental	2
30622281	ZFP36L1	Knockdown	Surgical - DMM	Protective	Detrimental	Articular cavity	Mouse	2019-01-08	Chun JS	Exogenous	siRNA	Surgical	Detrimental	2

## Sheet: Promising
PMID	Gene	Effect on gene product	Model	Susceptibility observed	Inferred gene effect	Delivery	Species	pub_date	LastAuthor	Type	Intervention	simpleModel	effectConsensus
21337391	ADAMTS5	Removal	Surgical - DMM	Protective	Detrimental	Global	Mouse	2010-10-26	Plaas A	Genetic		Surgical	Detrimental
21337391	ADAMTS5	Removal	TGFB and Treadmill	Protective	Detrimental	Global	Mouse	2010-10-26	Plaas A	Genetic		Exercise	Detrimental
19010693	ADAMTS5	Removal	Surgical - DMM	Protective	Detrimental	Global	Mouse	2008-10-17	van Osch GJ	Genetic		Surgical	Detrimental
17968948	ADAMTS5	Removal	Surgical - DMM	Protective	Detrimental	Global	Mouse	2007-11-01	Glasson SS	Genetic		Surgical	Detrimental
15800624	ADAMTS5	Removal	Surgical - DMM	Protective	Detrimental	Global	Mouse	2005-03-31	Morris EA	Genetic		Surgical	Detrimental
23954517	ADAMTS5	Inhibition	STR/ort	Protective	Detrimental	Articular cavity	Mouse	2013-08-15	Visintin M	Exogenous	Antibody	Surgical	Detrimental
26410555	ADAMTS5	Inhibition	Surgical - DMM	Protective	Detrimental	systemic	Mouse	2015-09-26	Malfait AM	Exogenous	Antibody	Surgical	Detrimental
28120109	ADAMTS5	Knockdown	Surgical - DMM	Protective	Detrimental	Articular cavity	Mouse	2017-01-24	Sasho T	Exogenous	siRNA	Surgical	Detrimental
25889639	BMP7	Removal	Spontaneous	Detrimental	Protective	Forelimb	Mouse	2015-04-15	Tsuji K	Genetic		Ageing	Protective
17977753	BMP7	exogenous	Surgical - ACLT	Protective	Protective	Articular cavity	Rabbit	2007-10-31	Amiel D	Exogenous	Protein	Surgical	Protective
18941854	BMP7	exogenous	Surgical - ACLT	Protective	Protective	Articular cavity	Rabbit	2008-10-22	Amiel D	Exogenous	Protein	Surgical	Protective
19170094	BMP7	exogenous	Exercise	Protective	Protective	Articular cavity	Rat	2009-08-01	Muneta T	Exogenous	Protein	Exercise	Protective
20872588	BMP7	exogenous	Surgical - ACLT	Protective	Protective	Articular cavity	Rabbit	2010-11-01	Sekiya I	Exogenous	Protein	Surgical	Protective
15492776	BMPR1A	Removal	Spontaneous	Detrimental	Protective	Developing Joints	Mouse	2004-10-19	Kingsley DM	Genetic		Ageing	Protective
28420447	BMPR1A	Activation	Surgical - DMM	Protective	Protective	Articular cavity	Mouse	2017-04-18	Nohe A	Exogenous	CK2.1	Surgical	Protective
31222033	CHUK	Removal	Surgical - DMM	Protective	Detrimental	Cartilage Inducible	Mouse	2019-06-20	Otero M	Genetic		Surgical	Detrimental
30405206	CHUK	Inhibition	Surgical - DMM + MM	Protective	Detrimental	Articular cavity	Mouse	2018-11-07	Saito T	Exogenous	BMS-345541	Surgical	Detrimental
30972197	DNMT3B	Removal	Surgical - TMJ	Detrimental	Protective	Cartilage Inducible	Mouse	2019-03-15	Mao JJ	Genetic		Surgical	Protective
28614801	DNMT3B	Loss of function	Spontaneous	Detrimental	Protective	Cartilage Inducible	Mouse	2017-06-15	O'Keefe RJ	Genetic		Ageing	Protective
28614801	DNMT3B	Gain of function	Surgical - DMM	Protective	Protective	Cartilage Inducible	Mouse	2017-06-15	O'Keefe RJ	Genetic		Surgical	Protective
30972197	DNMT3B	Overexpression	MIA	Protective	Protective	Articular cavity	Mouse	2019-03-15	Mao JJ	Exogenous	Viral	MIA	Protective
30513362	DOT1L	Removal	Spontaneous	Detrimental	Protective	Cartilage Inducible	Mouse	2018-12-01	Monteagudo S	Genetic		Ageing	Protective
30513362	DOT1L	Removal	Surgical - DMM	Detrimental	Protective	Cartilage Inducible	Mouse	2018-12-01	Monteagudo S	Genetic		Surgical	Protective
28627522	DOT1L	Inhibition	Spontaneous	Detrimental	Protective	Articular cavity	Mouse	2017-06-19	Lories RJ	Exogenous	EPZ-5676	Ageing	Protective
24347567	EPAS1	Removal	Surgical - DMM	Protective	Detrimental	Cartilage	Mouse	2013-12-17	Chun JS	Genetic		Surgical	Detrimental
21869830	EPAS1	Removal	Surgical - DMM	Protective	Detrimental	Cartilage	Mouse	2011-08-26	Chun JS	Genetic		Surgical	Detrimental
20495569	EPAS1	Overexpression	Spontaneous	Detrimental	Detrimental	Cartilage	Mouse	2010-05-23	Chun JS	Genetic		Ageing	Detrimental
20495569	EPAS1	Haploinsufficiency	Collagenase	Protective	Detrimental	Global	Mouse	2010-05-23	Chun JS	Genetic		Protease	Detrimental
20495569	EPAS1	Haploinsufficiency	Surgical - DMM	Protective	Detrimental	Global	Mouse	2010-05-23	Chun JS	Genetic		Surgical	Detrimental
20495569	EPAS1	Overexpression	Spontaneous	Detrimental	Detrimental	Articular cavity	Mouse	2010-05-23	Chun JS	Exogenous	Viral	Ageing	Detrimental
21869830	EPAS1	Overexpression	Surgical - DMM	Detrimental	Detrimental	Articular cavity	Mouse	2011-08-26	Chun JS	Exogenous	Viral	Surgical	Detrimental
26241779	EPAS1	Overexpression	Spontaneous	Detrimental	Detrimental	Articular cavity	Mouse	2015-08-01	Chun JS	Exogenous	Viral	Ageing	Detrimental
31357086	EPAS1	Knockdown	Surgical - DMM	Protective	Detrimental	Articular cavity	Mouse	2019-07-26	Li X	Exogenous	siRNA	Surgical	Detrimental
26698846	F2RL1	Removal	Surgical - DMM	Protective	Detrimental	Global	Mouse	2015-12-23	Ferrell WR	Genetic		Surgical	Detrimental
25200274	F2RL1	Removal	Surgical - DMM	Protective	Detrimental	Global	Mouse	2014-12-01	Little CB	Genetic		Surgical	Detrimental
21285164	F2RL1	Removal	Surgical - DMM	Protective	Detrimental	Global	Mouse	2011-02-01	Boileau C	Genetic		Surgical	Detrimental
20584806	F2RL1	Removal	Surgical - DMM	Protective	Detrimental	Global	Mouse	2010-06-28	McInnes IB	Genetic		Surgical	Detrimental
20584806	F2RL1	Removal	Surgical - ACLT	Protective	Detrimental	Global	Mouse	2010-06-28	McInnes IB	Genetic		Surgical	Detrimental
20584806	F2RL1	Inhibition	Surgical - DMM	Protective	Detrimental	systemic	Mouse	2010-06-28	McInnes IB	Exogenous	Antibody	Surgical	Detrimental
20584806	F2RL1	Inhibition	Surgical - DMM	Protective	Detrimental	systemic	Mouse	2010-06-28	McInnes IB	Exogenous	p520	Surgical	Detrimental
31841119	F2RL1	Inhibition	Surgical - ACLT	Protective	Detrimental	Articular cavity	Rat	2019-12-16	You H	Exogenous	AZ3451	Surgical	Detrimental
32134473	F2RL1	Activation	Surgical - ACLT + MM	Detrimental	Detrimental	Articular cavity	Rat	2020-03-27	Chen H	Exogenous	SLIGRL-NH2	Surgical	Detrimental
32134473	F2RL1	Inhibition	Surgical - ACLT + MM	Protective	Detrimental	Articular cavity	Rat	2020-03-27	Chen H	Exogenous	FSLLRY-NH2	Surgical	Detrimental
29691281	FGFR1	Removal	Spontaneous	Protective	Detrimental	Cartilage Inducible	Mouse	2018-04-24	Chen L	Genetic		Ageing	Detrimental
29691281	FGFR1	Removal	Surgical - UAC	Protective	Detrimental	Cartilage Inducible	Mouse	2018-04-24	Chen L	Genetic		Surgical	Detrimental
22833219	FGFR1	Removal	Spontaneous	Protective	Detrimental	Cartilage Inducible	Mouse	2012-12-01	Chen L	Genetic		Ageing	Detrimental
22833219	FGFR1	Removal	Surgical - DMM	Protective	Detrimental	Cartilage Inducible	Mouse	2012-12-01	Chen L	Genetic		Surgical	Detrimental
27041213	FGFR1	Inhibition	Surgical - DMM	Protective	Detrimental	Articular cavity	Mouse	2016-04-04	Chen L	Exogenous	G141	Surgical	Detrimental
30201491	FGFR1	Inhibition	Surgical - DMM	Protective	Detrimental	Articular cavity	Mouse	2018-09-08	Chen L	Exogenous	peptide	Surgical	Detrimental
29555825	FYN	Removal	Spontaneous	Protective	Detrimental	Global	Mouse	2018-03-19	Bai X	Genetic		Ageing	Detrimental
29555825	FYN	Removal	Surgical - DMM	Protective	Detrimental	Global	Mouse	2018-03-19	Bai X	Genetic		Surgical	Detrimental
31534047	FYN	Removal	Surgical - DMM	Protective	Detrimental	Global	Mouse	2019-09-19	Robinson WH	Genetic		Surgical	Detrimental
29555825	FYN	Inhibition	Surgical - DMM	Protective	Detrimental	systemic	Mouse	2018-03-19	Bai X	Exogenous	PP1	Surgical	Detrimental
29555825	FYN	Inhibition	Surgical - DMM	Protective	Detrimental	systemic	Mouse	2018-03-19	Bai X	Exogenous	AZD0530	Surgical	Detrimental
32214220	HIF1A	Removal	Surgical – MCL + MM	Detrimental	Protective	Cartilage Inducible	Mouse	2020-03-25	Saito T	Genetic		Surgical	Protective
32587244	HIF1A	Activation	Surgical - DMM	Protective	Protective	Articular cavity	Mouse	2020-06-25	Xiao J	Exogenous	DMOG	Surgical	Protective
24428864	IHH	Removal	Spontaneous	Protective	Detrimental	Cartilage Inducible	Mouse	2014-01-15	Wei L	Genetic		Ageing	Detrimental
29440889	IHH	Inhibition	Surgical - ACLT	Protective	Detrimental	Articular cavity	Rat	2018-01-31	Wei L	Exogenous	siRNA	Surgical	Detrimental
32431699	IL1RN	Removal	MIA	Detrimental	Protective	Global	Mouse	2020-05-05	Cho ML	Genetic		MIA	Protective
20733349	IL1RN	Overexpression	Surgical - ACLT	Protective	Protective	Articular cavity	Rabbit	2010-10-31	Chen L	Exogenous	Viral	Surgical	Protective
25219670	IL1RN	exogenous	Surgical - ACLT	Protective	Protective	Articular cavity	Rat	2014-09-16	Jay GD	Exogenous	Protein	Surgical	Protective
27539076	IL1RN	exogenous	Surgical - ACLT	Protective	Protective	Articular cavity	Rat	2016-08-19	D'Souza G	Exogenous	Protein	Surgical	Protective
14558093	ITGA1	Removal	Spontaneous	Detrimental	Protective	Global	Mouse	2003-10-01	Lotz M	Genetic		Ageing	Protective
27211864	ITGA1	Removal	Surgical - DMM	Detrimental	Protective	Global	Mouse	2016-05-20	Clark AL	Genetic		Surgical	Protective
24018042	ITGA1	Overexpression	Surgical - DMM	Protective	Protective	Articular cavity	Mouse	2013-09-07	Jin EJ	Exogenous	Viral	Surgical	Protective
31160553	mir-140	Removal	Spontaneous	Detrimental	Protective	Global	Mouse	2019-06-03	Asahara H	Genetic		Ageing	Protective
20466812	mir-140	Removal	Spontaneous	Detrimental	Protective	Cartilage	Mouse	2010-05-13	Asahara H	Genetic		Ageing	Protective
20466812	mir-140	Removal	Surgical - DMM	Detrimental	Protective	Cartilage	Mouse	2010-05-13	Asahara H	Genetic		Surgical	Protective
28647469	mir-140	Overexpression	Surgical - ACLT+ MM	Protective	Protective	Articular cavity	Rat	2017-06-21	Shen B	Exogenous	agomir	Surgical	Protective
31790972	mir-140	Overexpression	Surgical - DMM + ACLT	Protective	Protective	Articular cavity	Rat	2019-11-09	Shen B	Exogenous	agomir	Surgical	Protective
30932160	mir-21-5p	Removal	Spontaneous	Protective	Detrimental	Cartilage Inducible	Mouse	2019-04-01	Zheng X	Genetic		Ageing	Detrimental
30932160	mir-21-5p	Removal	Surgical - DMM	Protective	Detrimental	Cartilage Inducible	Mouse	2019-04-01	Zheng X	Genetic		Surgical	Detrimental
32357909	mir-21-5p	Removal	Surgical – UAC	Protective	Detrimental	Global	Mouse	2020-05-01	Zhao H	Genetic		Surgical	Detrimental
30932160	mir-21-5p	Removal	Surgical - DMM	Protective	Detrimental	Articular cavity	Mouse	2019-04-01	Zheng X	Exogenous	Antagomir	Surgical	Detrimental
30145794	mir-483-5p	Overexpression	Spontaneous	Detrimental	Detrimental	Inducible	Mouse	2018-08-26	Bai X	Genetic		Ageing	Detrimental
28139355	mir-483-5p	Overexpression	Surgical - DMM	Detrimental	Detrimental	Inducible	Mouse	2017-01-27	Bai X	Genetic		Surgical	Detrimental
28139355	mir-483-5p	Overexpression	Spontaneous	Detrimental	Detrimental	Articular cavity	Mouse	2017-01-27	Bai X	Exogenous	Viral	Ageing	Detrimental
30145794	mir-483-5p	Overexpression	Surgical - DMM	Detrimental	Detrimental	Articular cavity	Mouse	2018-08-26	Bai X	Exogenous	Viral	Surgical	Detrimental
23298463	MMP13	Removal	Surgical - DMM + MM	Protective	Detrimental	Cartilage Inducible	Mouse	2013-01-08	Chen D	Genetic		Surgical	Detrimental
19950295	MMP13	Removal	Spontaneous	Protective	Detrimental	Global	Mouse	2009-12-01	Thompson EW	Genetic		Ageing	Detrimental
19950295	MMP13	Removal	Surgical - DMM	Protective	Detrimental	Global	Mouse	2009-12-01	Thompson EW	Genetic		Surgical	Detrimental
11134178	MMP13	Overexpression	Spontaneous	Detrimental	Detrimental	Global	Mouse	2001-01-01	DeGennaro LJ	Genetic		Ageing	Detrimental
17623656	MMP13	Inhibition	Surgical - DMM	Protective	Detrimental	systemic	Rabbit	2007-07-10	Dyer RD	Exogenous	MMP13 inhibitor	Surgical	Detrimental
23298463	MMP13	Inhibition	Surgical - MMTL	Protective	Detrimental	systemic	Mouse	2013-01-08	Chen D	Exogenous	CL82198	Surgical	Detrimental
24848439	MMP13	Knockdown	Surgical - DMM	Protective	Detrimental	Articular cavity	Mouse	2014-05-22	Takahashi K	Exogenous	siRNA	Surgical	Detrimental
28120109	MMP13	Knockdown	Surgical - DMM	Protective	Detrimental	Articular cavity	Mouse	2017-01-24	Sasho T	Exogenous	siRNA	Surgical	Detrimental
30345823	MMP13	Knockdown	Surgical - DMM	Protective	Detrimental	Articular cavity	Mouse	2018-10-26	Sasho T	Exogenous	siRNA	Surgical	Detrimental
30842121	MMP13	Removal	Surgical - DMM	Protective	Detrimental	Articular cavity	Mouse	2019-03-06	Chen D	Exogenous	CRISPR	Surgical	Detrimental
24529376	MTF1	Removal	Surgical - DMM	Protective	Detrimental	Cartilage	Mouse	2014-02-13	Chun JS	Genetic		Surgical	Detrimental
26241779	MTF1	Overexpression	Spontaneous	Detrimental	Detrimental	Articular cavity	Mouse	2015-08-01	Chun JS	Exogenous	Viral	Ageing	Detrimental
24651621	MTOR	Removal	Surgical - DMM	Protective	Detrimental	Cartilage Inducible	Mouse	2014-03-20	Kapoor M	Genetic		Surgical	Detrimental
31007149	MTOR	Removal	Surgical - UAC	Protective	Detrimental	Cartilage Inducible	Mouse	2019-04-21	Wang M	Genetic		Surgical	Detrimental
27052304	MTOR	Inhibition	Collagenase	Protective	Detrimental	Articular cavity	Rabbit	2016-04-06	Meng H	Exogenous	Torin 1	Protease	Detrimental
27301478	MTOR	Inhibition	Collagenase	Protective	Detrimental	Articular cavity	Rabbit	2016-06-01	Cui YP	Exogenous	Torin 1	Protease	Detrimental
30145794	MTOR	Inhibition	Surgical - DMM	Protective	Detrimental	systemic	Mouse	2018-08-26	Bai X	Exogenous	Rapamycin	Surgical	Detrimental
31407595	MTOR	Inhibition	Surgical - DMM	Protective	Detrimental	Articular cavity	Mouse	2019-08-13	Jin Q	Exogenous	Rapamycin	Surgical	Detrimental
26408027	NFE2L2	Removal	Surgical - DMM	Detrimental	Protective	Global	Mouse	2015-09-26	Cao W	Genetic		Surgical	Protective
26408027	NFE2L2	Removal	MIA	Detrimental	Protective	Global	Mouse	2015-09-26	Cao W	Genetic		MIA	Protective
32564468	NFE2L2	Activation	Surgical - DMM	Protective	Protective	systemic	Mouse	2020-06-21	Yang Y	Exogenous	Nomilin	Surgical	Protective
28097228	OPRK1	Removal	Surgical - Cartilage Injury	Detrimental	Protective	Global	Mouse	2017-01-12	Evseenko D	Genetic		Surgical	Protective
32249508	OPRK1	Activation	Surgical - PMM	Protective	Protective	Articular cavity	Mouse	2020-04-05	Evseenko D	Exogenous	JT09	Surgical	Protective
25573665	PPARG	Removal	Surgical - DMM	Detrimental	Protective	Cartilage Inducible	Mouse	2015-01-08	Kapoor M	Genetic		Surgical	Protective
23375622	PPARG	Removal	Spontaneous	Detrimental	Protective	Cartilage	Mouse	2013-01-30	Kapoor M	Genetic		Ageing	Protective
31239244	PPARG	Removal	Surgical - DMM	Detrimental	Protective	Inducible	Mouse	2019-06-25	Cao W	Genetic		Surgical	Protective
15692987	PPARG	Activation	Surgical - MM	Protective	Protective	systemic	Guinea pig	2005-02-01	Pelletier JP	Exogenous	Pioglitazone	Surgical	Protective
30629676	PRG4	Overexpression	Dominant-negative TGFBR2	Protective	Protective	Global	Mouse	2019-01-10	Serra R	Genetic		Genetic	Protective
24834922	PRG4	Removal	Spontaneous	Detrimental	Protective	Global	Mouse	2014-05-16	Nah HD	Genetic		Ageing	Protective
23530215	PRG4	Removal	Spontaneous	Detrimental	Protective	Global	Mouse	2013-03-25	Jay GD	Genetic		Ageing	Protective
23486780	PRG4	Overexpression	Spontaneous	Protective	Protective	Global	Mouse	2013-03-13	Lee BH	Genetic		Ageing	Protective
23486780	PRG4	Overexpression	Surgical - ACLT	Protective	Protective	Global	Mouse	2013-03-13	Lee BH	Genetic		Surgical	Protective
31119776	PRG4	Removal	Spontaneous	Detrimental	Protective	Global	Mouse	2019-06-26	Krawetz R	Genetic		Ageing	Protective
20506144	PRG4	exogenous	Surgical - ACLT	Protective	Protective	Articular cavity	Mouse	2010-08-01	Elsaid KA	Exogenous	Protein	Surgical	Protective
28129516	PRG4	exogenous	Surgical - DMM	Protective	Protective	Articular cavity	Rat	2017-01-27	Fleming BC	Exogenous	Protein	Surgical	Protective
30070147	PRG4	Overexpression	Surgical - DMM	Protective	Protective	Articular cavity	Mouse	2018-10-17	Lee BHL	Exogenous	Viral	Surgical	Protective
31113964	RUNX1	Removal	Surgical - MMTL+MCL	Detrimental	Protective	Cartilage	Mouse	2019-05-21	Chung UI	Genetic		Surgical	Protective
26728350	RUNX1	Overexpression	Surgical - DMM + MM	Protective	Protective	Articular cavity	Mouse	2016-01-05	Ohba S	Exogenous	mRNA	Surgical	Protective
23723318	SIRT1	Removal	Surgical - DMM + MM	Detrimental	Protective	Cartilage	Mouse	2013-05-30	Kurosaka M	Genetic		Surgical	Protective
23723318	SIRT1	Removal	Spontaneous	Detrimental	Protective	Cartilage	Mouse	2013-05-30	Kurosaka M	Genetic		Ageing	Protective
23587642	SIRT1	Removal	Spontaneous	Detrimental	Protective	Global	Mouse	2013-04-13	McBurney MW	Genetic		Ageing	Protective
23124828	SIRT1	Inhibition	Spontaneous	Detrimental	Protective	Global	Mouse	2013-01-01	McBurney MW	Genetic		Ageing	Protective
22258484	SIRT1	Haploinsufficiency	Spontaneous	Detrimental	Protective	Global	Mouse	2012-01-17	Dvir-Ginzberg M	Genetic		Ageing	Protective
32665267	SIRT1	Removal	Surgical – DMM	Detrimental	Protective	Cartilage	Mouse	2020-07-14	Dvir-Ginzberg M	Genetic		Surgical	Protective
32499111	SIRT1	Removal	Spontaneous	Detrimental	Protective	Cartilage Inducible	Mouse	2020-06-01	Wu S	Genetic		Ageing	Protective
32499111	SIRT1	Removal	Surgical – DMM	Detrimental	Protective	Cartilage Inducible	Mouse	2020-06-01	Wu S	Genetic		Surgical	Protective
29922443	SIRT1	Activation	Surgical - DMM	Protective	Protective	systemic	Mouse	2018-05-05	Kuroda R	Exogenous	SRT1720	Surgical	Protective
31989845	SIRT1	Activation	Surgical - DMM	Protective	Protective	Articular cavity	Mouse	2020-01-28	Matsushita T	Exogenous	SRT2104	Surgical	Protective
24529376	SLC39A8	Overexpression	Surgical - DMM	Detrimental	Detrimental	Cartilage	Mouse	2014-02-13	Chun JS	Genetic		Surgical	Detrimental
24529376	SLC39A8	Removal	Surgical - DMM	Protective	Detrimental	Cartilage	Mouse	2014-02-13	Chun JS	Genetic		Surgical	Detrimental
24529376	SLC39A8	Overexpression	Spontaneous	Detrimental	Detrimental	Articular cavity	Mouse	2014-02-13	Chun JS	Exogenous	Viral	Ageing	Detrimental
26241779	SLC39A8	Overexpression	Spontaneous	Detrimental	Detrimental	Articular cavity	Mouse	2015-08-01	Chun JS	Exogenous	Viral	Ageing	Detrimental
20479257	SULF1	Removal	Spontaneous	Detrimental	Protective	Global	Mouse	2010-05-17	Lotz MK	Genetic		Ageing	Protective
20479257	SULF1	Removal	Surgical - DMM	Detrimental	Protective	Global	Mouse	2010-05-17	Lotz MK	Genetic		Surgical	Protective
27808352	SULF1	Overexpression	Surgical - DMM	Protective	Protective	Articular cavity	Mouse	2016-11-03	Neo M	Exogenous	Protein	Surgical	Protective
19747998	TNC	Removal	Surgical - DMM + ACL	Detrimental	Protective	Global	Mouse	2009-09-06	Uchida A	Genetic		Surgical	Protective
19747998	TNC	Removal	Spontaneous	Detrimental	Protective	Global	Mouse	2009-09-06	Uchida A	Genetic		Ageing	Protective
29219023	TNC	exogenous	Surgical - DMM + ACLT	Protective	Protective	Articular cavity	Mouse	2016-12-04	Sudo A	Exogenous	Protein	Surgical	Protective
30623241	TNFRSF11B	Removal	Surgical – TMJ	Detrimental	Protective	Global	Mouse	2019-01-08	Wang P	Genetic		Surgical	Protective
27541035	TNFRSF11B	Removal	Spontaneous	Detrimental	Protective	Global	Mouse	2016-08-19	Zhang Q	Genetic		Ageing	Protective
26018435	TNFRSF11B	Removal	Spontaneous	Detrimental	Protective	Global	Mouse	2015-05-27	Simonet WS	Genetic		Ageing	Protective
17907189	TNFRSF11B	Haploinsufficiency	Spontaneous	Detrimental	Protective	Global	Mouse	2007-10-01	Muneta T	Genetic		Ageing	Protective
17907189	TNFRSF11B	Haploinsufficiency	Surgical - DMM	Detrimental	Protective	Global	Mouse	2007-10-01	Muneta T	Genetic		Surgical	Protective
17907189	TNFRSF11B	exogenous	Surgical - DMM	Protective	Protective	Articular cavity	Mouse	2007-10-01	Muneta T	Exogenous	Protein	Surgical	Protective
18668550	TNFRSF11B	exogenous	Surgical - DMM + MM	Protective	Protective	Articular cavity	Mouse	2008-08-01	Cohen-Solal ME	Exogenous	Protein	Surgical	Protective
23723320	TNFRSF11B	exogenous	MIA	Protective	Protective	systemic	Rat	2013-05-30	Chapman V	Exogenous	Protein	MIA	Protective
32431699	TRAF3	Overexpression	Surgical – DMM	Protective	Protective	Global	Mouse	2020-05-05	Cho ML	Genetic		Surgical	Protective
32416098	TRAF3	Knockdown	Surgical - DMM	Detrimental	Protective	Articular cavity	Mouse	2020-05-19	Zhang X	Exogenous	siRNA	Surgical	Protective
29026147	VEGFA	Haploinsufficiency	Surgical - DMM	Protective	Detrimental	Cartilage	Mouse	2017-10-12	Olsen BR	Genetic		Surgical	Detrimental
25230745	VEGFA	Inhibition	Surgical - ACLT	Protective	Detrimental	Articular cavity	Rabbit	2014-09-18	Mochida J	Exogenous	Bevacizumab	Surgical	Detrimental
26531672	VEGFA	exogenous	Spontaneous	Detrimental	Detrimental	Articular cavity	Mouse	2015-11-04	Yang C	Exogenous	Protein	Ageing	Detrimental
29026147	VEGFA	Inhibition	Surgical - DMM	Protective	Detrimental	Articular cavity	Mouse	2017-10-12	Olsen BR	Exogenous	Antibody	Surgical	Detrimental
29329496	VEGFA	Inhibition	Surgical - DMM	Protective	Detrimental	Articular cavity	Mouse	2018-03-24	Bai X	Exogenous	bevacizumab	Surgical	Detrimental
29488610	VEGFA	exogenous	Surgical - ACLT	Detrimental	Detrimental	Articular cavity	Rat	2018-02-28	Weng JQ	Exogenous	Protein	Surgical	Detrimental
